# Supplementary material for: Sequential Route Choice Modeling Based on Dynamic Reference Points and Its Empirical Study
Source: Hindawi journal article supplement (doi:10.1155/2020/8081576), 2020-03-27
Supplement: f1 [file 8081576.f1.xls]

## Sheet: scenario 3
historical travel time information
currentScene	currentEvolve	section 1	section 2	section 3	section 4	section 5	section 6	section 7	section 8	section 9	section 10	currentPersonNo	roadSelect
3	1	0.03	0.12	0.1	0.04	0.1	0.13	0.11	0.1	0.03	0.1	1	2
3	1	0.0300176	0.162556	0.135463	0.0541853	0.100059	0.130076	0.110064	0.135463	0.040639	0.100059	2	1
3	1	0.0378705	0.121316	0.101097	0.0404387	0.126235	0.164106	0.138859	0.101097	0.030329	0.126235	3	1
3	1	0.0300675	0.152592	0.12716	0.0508638	0.100225	0.130293	0.110248	0.12716	0.0381479	0.100225	4	3
3	1	0.0354698	0.122333	0.101944	0.0407776	0.118233	0.153702	0.130056	0.101944	0.0305832	0.118233	5	2
3	1	0.0301152	0.148323	0.123603	0.0494411	0.100384	0.130499	0.110422	0.123603	0.0370808	0.100384	6	3
3	1	0.0336653	0.123849	0.103207	0.0412829	0.112218	0.145883	0.123439	0.103207	0.0309622	0.112218	7	2
3	1	0.0301845	0.144489	0.120407	0.0481629	0.100615	0.1308	0.110677	0.120407	0.0361222	0.100615	8	2
3	1	0.0329525	0.124837	0.104031	0.0416124	0.109842	0.142794	0.120826	0.104031	0.0312093	0.109842	9	3
3	1	0.0302813	0.141057	0.117548	0.0470192	0.100938	0.131219	0.111031	0.117548	0.0352644	0.100938	10	1
3	1	0.03001	0.12	0.1	0.04	0.100033	0.130043	0.110037	0.1	0.03	0.100033	11	3
3	1	0.0300365	0.162556	0.135463	0.0541853	0.100122	0.130158	0.110134	0.135463	0.040639	0.100122	12	1
3	1	0.0378705	0.12177	0.101475	0.0405901	0.126235	0.164106	0.138859	0.101475	0.0304426	0.126235	13	2
3	1	0.0300675	0.157325	0.131104	0.0524416	0.100225	0.130293	0.110248	0.131104	0.0393312	0.100225	14	3
3	1	0.0354698	0.12302	0.102517	0.0410066	0.118233	0.153702	0.130056	0.102517	0.030755	0.118233	15	3
3	1	0.0301152	0.152592	0.12716	0.0508638	0.100384	0.130499	0.110422	0.12716	0.0381479	0.100384	16	3
3	1	0.0336653	0.124837	0.104031	0.0416124	0.112218	0.145883	0.123439	0.104031	0.0312093	0.112218	17	3
3	1	0.0301845	0.148323	0.123603	0.0494411	0.100615	0.1308	0.110677	0.123603	0.0370808	0.100615	18	2
3	1	0.0329525	0.126005	0.105004	0.0420017	0.109842	0.142794	0.120826	0.105004	0.0315013	0.109842	19	3
3	1	0.0304118	0.141057	0.117548	0.0470192	0.101373	0.131784	0.11151	0.117548	0.0352644	0.101373	20	2
3	1	0.03003	0.120001	0.100001	0.0400002	0.1001	0.13013	0.11011	0.100001	0.0300002	0.1001	21	3
3	1	0.0300365	0.168318	0.140265	0.0561061	0.100122	0.130158	0.110134	0.140265	0.0420796	0.100122	22	3
3	1	0.0378705	0.122333	0.101944	0.0407776	0.126235	0.164106	0.138859	0.101944	0.0305832	0.126235	23	5
3	1	0.0300675	0.162556	0.135463	0.0541853	0.100225	0.130293	0.110248	0.135463	0.040639	0.100225	24	2
3	1	0.0354698	0.123849	0.103207	0.0412829	0.118233	0.153702	0.130056	0.103207	0.0309622	0.118233	25	2
3	1	0.0301152	0.157325	0.131104	0.0524416	0.100384	0.130499	0.110422	0.131104	0.0393312	0.100384	26	3
3	1	0.0336653	0.126005	0.105004	0.0420017	0.112218	0.145883	0.123439	0.105004	0.0315013	0.112218	27	6
3	1	0.0301845	0.152592	0.12716	0.0508638	0.100615	0.1308	0.110677	0.12716	0.0381479	0.100615	28	3
3	1	0.0336653	0.126005	0.105004	0.0420017	0.112218	0.145883	0.123439	0.105004	0.0315013	0.112218	29	3
3	1	0.0304118	0.144489	0.120407	0.0481629	0.101373	0.131784	0.11151	0.120407	0.0361222	0.101373	30	2
3	1	0.03005	0.120004	0.100003	0.0400012	0.100167	0.130217	0.110183	0.100003	0.0300009	0.100167	31	2
3	1	0.0300365	0.174647	0.145539	0.0582157	0.100122	0.130158	0.110134	0.145539	0.0436618	0.100122	32	3
3	1	0.0378705	0.12302	0.102517	0.0410066	0.126235	0.164106	0.138859	0.102517	0.030755	0.126235	33	3
3	1	0.0300675	0.168318	0.140265	0.0561061	0.100225	0.130293	0.110248	0.140265	0.0420796	0.100225	34	3
3	1	0.0354698	0.124837	0.104031	0.0416124	0.118233	0.153702	0.130056	0.104031	0.0312093	0.118233	35	6
3	1	0.0301152	0.162556	0.135463	0.0541853	0.100384	0.130499	0.110422	0.135463	0.040639	0.100384	36	1
3	1	0.0336653	0.127373	0.106144	0.0424576	0.112218	0.145883	0.123439	0.106144	0.0318432	0.112218	37	4
3	1	0.0301845	0.157325	0.131104	0.0524416	0.100615	0.1308	0.110677	0.131104	0.0393312	0.100615	38	1
3	1	0.0336653	0.127373	0.106144	0.0424576	0.112218	0.145883	0.123439	0.106144	0.0318432	0.112218	39	5
3	1	0.0304118	0.148323	0.123603	0.0494411	0.101373	0.131784	0.11151	0.123603	0.0370808	0.101373	40	4
3	1	0.031	0.120012	0.10001	0.0400039	0.103333	0.134333	0.113667	0.10001	0.0300029	0.103333	41	2
3	1	0.0300675	0.174647	0.145539	0.0582157	0.100225	0.130293	0.110248	0.145539	0.0436618	0.100225	42	4
3	1	0.0378705	0.123849	0.103207	0.0412829	0.126235	0.164106	0.138859	0.103207	0.0309622	0.126235	43	2
3	1	0.0300675	0.174647	0.145539	0.0582157	0.100225	0.130293	0.110248	0.145539	0.0436618	0.100225	44	1
3	1	0.0354698	0.126005	0.105004	0.0420017	0.118233	0.153702	0.130056	0.105004	0.0315013	0.118233	45	3
3	1	0.0301845	0.162556	0.135463	0.0541853	0.100615	0.1308	0.110677	0.135463	0.040639	0.100615	46	1
3	1	0.0336653	0.128962	0.107468	0.0429872	0.112218	0.145883	0.123439	0.107468	0.0322404	0.112218	47	5
3	1	0.0302812	0.157325	0.131104	0.0524416	0.100937	0.131219	0.111031	0.131104	0.0393312	0.100937	48	3
3	1	0.0345	0.127373	0.106144	0.0424576	0.115	0.1495	0.1265	0.106144	0.0318432	0.115	49	2
3	1	0.0305832	0.148323	0.123603	0.0494411	0.101944	0.132527	0.112138	0.123603	0.0370808	0.101944	50	6
3	1	0.0308	0.120029	0.100024	0.0400096	0.102667	0.133467	0.112933	0.100024	0.0300072	0.102667	51	5
3	1	0.0301152	0.174647	0.145539	0.0582157	0.100384	0.130499	0.110422	0.145539	0.0436618	0.100384	52	1
3	1	0.0378705	0.124837	0.104031	0.0416124	0.126235	0.164106	0.138859	0.104031	0.0312093	0.126235	53	4
3	1	0.0301152	0.174647	0.145539	0.0582157	0.100384	0.130499	0.110422	0.145539	0.0436618	0.100384	54	6
3	1	0.0354698	0.127373	0.106144	0.0424576	0.118233	0.153702	0.130056	0.106144	0.0318432	0.118233	55	2
3	1	0.0302813	0.162556	0.135463	0.0541853	0.100938	0.131219	0.111031	0.135463	0.040639	0.100938	56	1
3	1	0.0336653	0.130795	0.108995	0.0435982	0.112218	0.145883	0.123439	0.108995	0.0326986	0.112218	57	1
3	1	0.0302813	0.162556	0.135463	0.0541853	0.100938	0.131219	0.111031	0.135463	0.040639	0.100938	58	1
3	1	0.0345	0.128962	0.107468	0.0429872	0.115	0.1495	0.1265	0.107468	0.0322404	0.115	59	5
3	1	0.0308033	0.148323	0.123603	0.0494411	0.102678	0.133481	0.112945	0.123603	0.0370808	0.102678	60	2
3	1	0.03	0.120029	0.100024	0.0400096	0.1	0.13	0.11	0.100024	0.0300072	0.1	61	6
3	1	0.0301845	0.174647	0.145539	0.0582157	0.100615	0.1308	0.110677	0.145539	0.0436618	0.100615	62	2
3	1	0.0393312	0.124837	0.104031	0.0416124	0.131104	0.170435	0.144214	0.104031	0.0312093	0.131104	63	3
3	1	0.0301845	0.174647	0.145539	0.0582157	0.100615	0.1308	0.110677	0.145539	0.0436618	0.100615	64	6
3	1	0.0354698	0.128962	0.107468	0.0429872	0.118233	0.153702	0.130056	0.107468	0.0322404	0.118233	65	5
3	1	0.0304118	0.162556	0.135463	0.0541853	0.101373	0.131784	0.11151	0.135463	0.040639	0.101373	66	3
3	1	0.0336653	0.132895	0.110746	0.0442984	0.112218	0.145883	0.123439	0.110746	0.0332238	0.112218	67	1
3	1	0.0304118	0.162556	0.135463	0.0541853	0.101373	0.131784	0.11151	0.135463	0.040639	0.101373	68	3
3	1	0.0345	0.130795	0.108995	0.0435982	0.115	0.1495	0.1265	0.108995	0.0326986	0.115	69	5
3	1	0.0308033	0.152592	0.12716	0.0508638	0.102678	0.133481	0.112945	0.12716	0.0381479	0.102678	70	1
3	1	0.03	0.12006	0.10005	0.0400199	0.1	0.13	0.11	0.10005	0.0300149	0.1	71	6
3	1	0.0301845	0.181578	0.151315	0.0605261	0.100615	0.1308	0.110677	0.151315	0.0453946	0.100615	72	3
3	1	0.0393312	0.126005	0.105004	0.0420017	0.131104	0.170435	0.144214	0.105004	0.0315013	0.131104	73	2
3	1	0.0302812	0.174647	0.145539	0.0582157	0.100937	0.131219	0.111031	0.145539	0.0436618	0.100937	74	1
3	1	0.0354698	0.130795	0.108995	0.0435982	0.118233	0.153702	0.130056	0.108995	0.0326986	0.118233	75	4
3	1	0.0304118	0.168318	0.140265	0.0561061	0.101373	0.131784	0.11151	0.140265	0.0420796	0.101373	76	5
3	1	0.0336653	0.135288	0.11274	0.0450961	0.112218	0.145883	0.123439	0.11274	0.0338221	0.112218	77	3
3	1	0.0304118	0.168318	0.140265	0.0561061	0.101373	0.131784	0.11151	0.140265	0.0420796	0.101373	78	5
3	1	0.0354698	0.130795	0.108995	0.0435982	0.118233	0.153702	0.130056	0.108995	0.0326986	0.118233	79	2
3	1	0.0310804	0.152592	0.12716	0.0508638	0.103601	0.134682	0.113962	0.12716	0.0381479	0.103601	80	1
3	1	0.03	0.120111	0.100092	0.0400369	0.1	0.13	0.11	0.100092	0.0300277	0.1	81	2
3	1	0.0302812	0.181578	0.151315	0.0605261	0.100937	0.131219	0.111031	0.151315	0.0453946	0.100937	82	1
3	1	0.0393312	0.127373	0.106144	0.0424576	0.131104	0.170435	0.144214	0.106144	0.0318432	0.131104	83	5
3	1	0.0304118	0.174647	0.145539	0.0582157	0.101373	0.131784	0.11151	0.145539	0.0436618	0.101373	84	2
3	1	0.0365885	0.130795	0.108995	0.0435982	0.121962	0.15855	0.134158	0.108995	0.0326986	0.121962	85	3
3	1	0.0305832	0.168318	0.140265	0.0561061	0.101944	0.132527	0.112138	0.140265	0.0420796	0.101944	86	3
3	1	0.0336653	0.138	0.115	0.046	0.112218	0.145883	0.123439	0.115	0.0345	0.112218	87	3
3	1	0.0304118	0.174647	0.145539	0.0582157	0.101373	0.131784	0.11151	0.145539	0.0436618	0.101373	88	4
3	1	0.0354698	0.132895	0.110746	0.0442984	0.118233	0.153702	0.130056	0.110746	0.0332238	0.118233	89	2
3	1	0.0310804	0.157325	0.131104	0.0524416	0.103601	0.134682	0.113962	0.131104	0.0393312	0.103601	90	6
3	1	0.03	0.120189	0.100157	0.0400629	0.1	0.13	0.11	0.100157	0.0300472	0.1	91	2
3	1	0.0304118	0.181578	0.151315	0.0605261	0.101373	0.131784	0.11151	0.151315	0.0453946	0.101373	92	6
3	1	0.0393312	0.128962	0.107468	0.0429872	0.131104	0.170435	0.144214	0.107468	0.0322404	0.131104	93	2
3	1	0.0304118	0.181578	0.151315	0.0605261	0.101373	0.131784	0.11151	0.151315	0.0453946	0.101373	94	4
3	1	0.0365885	0.132895	0.110746	0.0442984	0.121962	0.15855	0.134158	0.110746	0.0332238	0.121962	95	3
3	1	0.0305832	0.174647	0.145539	0.0582157	0.101944	0.132527	0.112138	0.145539	0.0436618	0.101944	96	2
3	1	0.0336653	0.141057	0.117548	0.0470192	0.112218	0.145883	0.123439	0.117548	0.0352644	0.112218	97	5
3	1	0.0304118	0.181578	0.151315	0.0605261	0.101373	0.131784	0.11151	0.151315	0.0453946	0.101373	98	1
3	1	0.0354698	0.135288	0.11274	0.0450961	0.118233	0.153702	0.130056	0.11274	0.0338221	0.118233	99	3
3	1	0.0314238	0.157325	0.131104	0.0524416	0.104746	0.13617	0.115221	0.131104	0.0393312	0.104746	100	2
3	1	0.03	0.120302	0.100252	0.0401008	0.1	0.13	0.11	0.100252	0.0300756	0.1	101	3
3	1	0.0304118	0.189149	0.157624	0.0630496	0.101373	0.131784	0.11151	0.157624	0.0472872	0.101373	102	3
3	1	0.0393312	0.130795	0.108995	0.0435982	0.131104	0.170435	0.144214	0.108995	0.0326986	0.131104	103	1
3	1	0.0305832	0.181578	0.151315	0.0605261	0.101944	0.132527	0.112138	0.151315	0.0453946	0.101944	104	1
3	1	0.0365885	0.135288	0.11274	0.0450961	0.121962	0.15855	0.134158	0.11274	0.0338221	0.121962	105	2
3	1	0.0305832	0.181578	0.151315	0.0605261	0.101944	0.132527	0.112138	0.151315	0.0453946	0.101944	106	4
3	1	0.0336653	0.144489	0.120407	0.0481629	0.112218	0.145883	0.123439	0.120407	0.0361222	0.112218	107	5
3	1	0.0305832	0.181578	0.151315	0.0605261	0.101944	0.132527	0.112138	0.151315	0.0453946	0.101944	108	3
3	1	0.0354698	0.138	0.115	0.046	0.118233	0.153702	0.130056	0.115	0.0345	0.118233	109	5
3	1	0.0314238	0.162556	0.135463	0.0541853	0.104746	0.13617	0.115221	0.135463	0.040639	0.104746	110	3
3	1	0.03	0.120461	0.100384	0.0401536	0.1	0.13	0.11	0.100384	0.0301152	0.1	111	2
3	1	0.0305832	0.189149	0.157624	0.0630496	0.101944	0.132527	0.112138	0.157624	0.0472872	0.101944	112	1
3	1	0.0409863	0.130795	0.108995	0.0435982	0.136621	0.177607	0.150283	0.108995	0.0326986	0.136621	113	3
3	1	0.0308033	0.181578	0.151315	0.0605261	0.102678	0.133481	0.112945	0.151315	0.0453946	0.102678	114	1
3	1	0.0365885	0.138	0.115	0.046	0.121962	0.15855	0.134158	0.115	0.0345	0.121962	115	3
3	1	0.0308033	0.181578	0.151315	0.0605261	0.102678	0.133481	0.112945	0.151315	0.0453946	0.102678	116	6
3	1	0.0336653	0.148323	0.123603	0.0494411	0.112218	0.145883	0.123439	0.123603	0.0370808	0.112218	117	6
3	1	0.0308033	0.181578	0.151315	0.0605261	0.102678	0.133481	0.112945	0.151315	0.0453946	0.102678	118	5
3	1	0.0354698	0.141057	0.117548	0.0470192	0.118233	0.153702	0.130056	0.117548	0.0352644	0.118233	119	2
3	1	0.0314238	0.168318	0.140265	0.0561061	0.104746	0.13617	0.115221	0.140265	0.0420796	0.104746	120	2
3	1	0.03	0.120675	0.100562	0.0402249	0.1	0.13	0.11	0.100562	0.0301687	0.1	121	5
3	1	0.0308033	0.189149	0.157624	0.0630496	0.102678	0.133481	0.112945	0.157624	0.0472872	0.102678	122	4
3	1	0.0409863	0.132895	0.110746	0.0442984	0.136621	0.177607	0.150283	0.110746	0.0332238	0.136621	123	4
3	1	0.0310805	0.181578	0.151315	0.0605261	0.103602	0.134682	0.113962	0.151315	0.0453946	0.103602	124	1
3	1	0.0365885	0.141057	0.117548	0.0470192	0.121962	0.15855	0.134158	0.117548	0.0352644	0.121962	125	2
3	1	0.0308033	0.189149	0.157624	0.0630496	0.102678	0.133481	0.112945	0.157624	0.0472872	0.102678	126	6
3	1	0.0336653	0.152592	0.12716	0.0508638	0.112218	0.145883	0.123439	0.12716	0.0381479	0.112218	127	3
3	1	0.0310805	0.181578	0.151315	0.0605261	0.103602	0.134682	0.113962	0.151315	0.0453946	0.103602	128	5
3	1	0.0354698	0.144489	0.120407	0.0481629	0.118233	0.153702	0.130056	0.120407	0.0361222	0.118233	129	2
3	1	0.0314238	0.174647	0.145539	0.0582157	0.104746	0.13617	0.115221	0.145539	0.0436618	0.104746	130	3
3	1	0.03	0.120956	0.100796	0.0403185	0.1	0.13	0.11	0.100796	0.0302389	0.1	131	3
3	1	0.0310805	0.189149	0.157624	0.0630496	0.103602	0.134682	0.113962	0.157624	0.0472872	0.103602	132	6
3	1	0.0409863	0.135288	0.11274	0.0450961	0.136621	0.177607	0.150283	0.11274	0.0338221	0.136621	133	2
3	1	0.0314238	0.181578	0.151315	0.0605261	0.104746	0.13617	0.115221	0.151315	0.0453946	0.104746	134	1
3	1	0.0365885	0.144489	0.120407	0.0481629	0.121962	0.15855	0.134158	0.120407	0.0361222	0.121962	135	3
3	1	0.0310805	0.189149	0.157624	0.0630496	0.103602	0.134682	0.113962	0.157624	0.0472872	0.103602	136	1
3	1	0.0336653	0.157325	0.131104	0.0524416	0.112218	0.145883	0.123439	0.131104	0.0393312	0.112218	137	3
3	1	0.0314238	0.181578	0.151315	0.0605261	0.104746	0.13617	0.115221	0.151315	0.0453946	0.104746	138	2
3	1	0.0354698	0.148323	0.123603	0.0494411	0.118233	0.153702	0.130056	0.123603	0.0370808	0.118233	139	4
3	1	0.0314238	0.181578	0.151315	0.0605261	0.104746	0.13617	0.115221	0.151315	0.0453946	0.104746	140	4
3	1	0.03	0.121316	0.101097	0.0404387	0.1	0.13	0.11	0.101097	0.030329	0.1	141	2
3	1	0.0310805	0.197397	0.164497	0.0657989	0.103602	0.134682	0.113962	0.164497	0.0493492	0.103602	142	3
3	1	0.0409863	0.138	0.115	0.046	0.136621	0.177607	0.150283	0.115	0.0345	0.136621	143	1
3	1	0.0318432	0.181578	0.151315	0.0605261	0.106144	0.137987	0.116758	0.151315	0.0453946	0.106144	144	5
3	1	0.0365885	0.148323	0.123603	0.0494411	0.121962	0.15855	0.134158	0.123603	0.0370808	0.121962	145	3
3	1	0.0314238	0.189149	0.157624	0.0630496	0.104746	0.13617	0.115221	0.157624	0.0472872	0.104746	146	1
3	1	0.0336653	0.162556	0.135463	0.0541853	0.112218	0.145883	0.123439	0.135463	0.040639	0.112218	147	5
3	1	0.0314238	0.189149	0.157624	0.0630496	0.104746	0.13617	0.115221	0.157624	0.0472872	0.104746	148	1
3	1	0.0354698	0.152592	0.12716	0.0508638	0.118233	0.153702	0.130056	0.12716	0.0381479	0.118233	149	5
3	1	0.0314238	0.189149	0.157624	0.0630496	0.104746	0.13617	0.115221	0.157624	0.0472872	0.104746	150	6
3	1	0.03	0.12177	0.101475	0.0405901	0.1	0.13	0.11	0.101475	0.0304426	0.1	151	1
3	1	0.0314238	0.197397	0.164497	0.0657989	0.104746	0.13617	0.115221	0.164497	0.0493492	0.104746	152	5
3	1	0.0428525	0.138	0.115	0.046	0.142842	0.185694	0.157126	0.115	0.0345	0.142842	153	2
3	1	0.032349	0.181578	0.151315	0.0605261	0.10783	0.140179	0.118613	0.151315	0.0453946	0.10783	154	3
3	1	0.0365885	0.152592	0.12716	0.0508638	0.121962	0.15855	0.134158	0.12716	0.0381479	0.121962	155	1
3	1	0.0318432	0.189149	0.157624	0.0630496	0.106144	0.137987	0.116758	0.157624	0.0472872	0.106144	156	4
3	1	0.0345	0.162556	0.135463	0.0541853	0.115	0.1495	0.1265	0.135463	0.040639	0.115	157	5
3	1	0.0318432	0.189149	0.157624	0.0630496	0.106144	0.137987	0.116758	0.157624	0.0472872	0.106144	158	1
3	1	0.0365885	0.152592	0.12716	0.0508638	0.121962	0.15855	0.134158	0.12716	0.0381479	0.121962	159	1
3	1	0.0318432	0.189149	0.157624	0.0630496	0.106144	0.137987	0.116758	0.157624	0.0472872	0.106144	160	5
3	1	0.0300005	0.12177	0.101475	0.0405901	0.100002	0.130002	0.110002	0.101475	0.0304426	0.100002	161	3
3	1	0.0318432	0.197397	0.164497	0.0657989	0.106144	0.137987	0.116758	0.164497	0.0493492	0.106144	162	3
3	1	0.0428525	0.141057	0.117548	0.0470192	0.142842	0.185694	0.157126	0.117548	0.0352644	0.142842	163	2
3	1	0.0329525	0.181578	0.151315	0.0605261	0.109842	0.142794	0.120826	0.151315	0.0453946	0.109842	164	2
3	1	0.0378705	0.152592	0.12716	0.0508638	0.126235	0.164106	0.138859	0.12716	0.0381479	0.126235	165	4
3	1	0.032349	0.189149	0.157624	0.0630496	0.10783	0.140179	0.118613	0.157624	0.0472872	0.10783	166	3
3	1	0.0354698	0.162556	0.135463	0.0541853	0.118233	0.153702	0.130056	0.135463	0.040639	0.118233	167	2
3	1	0.032349	0.189149	0.157624	0.0630496	0.10783	0.140179	0.118613	0.157624	0.0472872	0.10783	168	5
3	1	0.0378705	0.152592	0.12716	0.0508638	0.126235	0.164106	0.138859	0.12716	0.0381479	0.126235	169	3
3	1	0.032349	0.189149	0.157624	0.0630496	0.10783	0.140179	0.118613	0.157624	0.0472872	0.10783	170	3
3	1	0.0300005	0.122333	0.101944	0.0407776	0.100002	0.130002	0.110002	0.101944	0.0305832	0.100002	171	6
3	1	0.0318432	0.206361	0.171968	0.0687871	0.106144	0.137987	0.116758	0.171968	0.0515903	0.106144	172	3
3	1	0.0428525	0.144489	0.120407	0.0481629	0.142842	0.185694	0.157126	0.120407	0.0361222	0.142842	173	2
3	1	0.0329525	0.189149	0.157624	0.0630496	0.109842	0.142794	0.120826	0.157624	0.0472872	0.109842	174	3
3	1	0.0378705	0.157325	0.131104	0.0524416	0.126235	0.164106	0.138859	0.131104	0.0393312	0.126235	175	6
3	1	0.032349	0.197397	0.164497	0.0657989	0.10783	0.140179	0.118613	0.164497	0.0493492	0.10783	176	2
3	1	0.0354698	0.168318	0.140265	0.0561061	0.118233	0.153702	0.130056	0.140265	0.0420796	0.118233	177	1
3	1	0.032349	0.197397	0.164497	0.0657989	0.10783	0.140179	0.118613	0.164497	0.0493492	0.10783	178	6
3	1	0.0378705	0.157325	0.131104	0.0524416	0.126235	0.164106	0.138859	0.131104	0.0393312	0.126235	179	3
3	1	0.032349	0.197397	0.164497	0.0657989	0.10783	0.140179	0.118613	0.164497	0.0493492	0.10783	180	2
3	1	0.0300005	0.12302	0.102517	0.0410066	0.100002	0.130002	0.110002	0.102517	0.030755	0.100002	181	4
3	1	0.0318432	0.216083	0.180069	0.0720277	0.106144	0.137987	0.116758	0.180069	0.0540208	0.106144	182	1
3	1	0.0428525	0.148323	0.123603	0.0494411	0.142842	0.185694	0.157126	0.123603	0.0370808	0.142842	183	1
3	1	0.0336653	0.189149	0.157624	0.0630496	0.112218	0.145883	0.123439	0.157624	0.0472872	0.112218	184	2
3	1	0.0378705	0.162556	0.135463	0.0541853	0.126235	0.164106	0.138859	0.135463	0.040639	0.126235	185	2
3	1	0.032349	0.206361	0.171968	0.0687871	0.10783	0.140179	0.118613	0.171968	0.0515903	0.10783	186	5
3	1	0.0354698	0.174647	0.145539	0.0582157	0.118233	0.153702	0.130056	0.145539	0.0436618	0.118233	187	3
3	1	0.032349	0.206361	0.171968	0.0687871	0.10783	0.140179	0.118613	0.171968	0.0515903	0.10783	188	5
3	1	0.0378705	0.162556	0.135463	0.0541853	0.126235	0.164106	0.138859	0.135463	0.040639	0.126235	189	1
3	1	0.032349	0.206361	0.171968	0.0687871	0.10783	0.140179	0.118613	0.171968	0.0515903	0.10783	190	1
3	1	0.0300005	0.123849	0.103207	0.0412829	0.100002	0.130002	0.110002	0.103207	0.0309622	0.100002	191	5
3	1	0.032349	0.216083	0.180069	0.0720277	0.10783	0.140179	0.118613	0.180069	0.0540208	0.10783	192	5
3	1	0.0449468	0.148323	0.123603	0.0494411	0.149823	0.194769	0.164805	0.123603	0.0370808	0.149823	193	1
3	1	0.0336653	0.197397	0.164497	0.0657989	0.112218	0.145883	0.123439	0.164497	0.0493492	0.112218	194	3
3	1	0.0378705	0.168318	0.140265	0.0561061	0.126235	0.164106	0.138859	0.140265	0.0420796	0.126235	195	1
3	1	0.0329525	0.206361	0.171968	0.0687871	0.109842	0.142794	0.120826	0.171968	0.0515903	0.109842	196	1
3	1	0.0354698	0.181578	0.151315	0.0605261	0.118233	0.153702	0.130056	0.151315	0.0453946	0.118233	197	3
3	1	0.0329525	0.206361	0.171968	0.0687871	0.109842	0.142794	0.120826	0.171968	0.0515903	0.109842	198	6
3	1	0.0393312	0.162556	0.135463	0.0541853	0.131104	0.170435	0.144214	0.135463	0.040639	0.131104	199	2
3	1	0.0329525	0.206361	0.171968	0.0687871	0.109842	0.142794	0.120826	0.171968	0.0515903	0.109842	200	6
3	1	0.0300005	0.124837	0.104031	0.0416124	0.100002	0.130002	0.110002	0.104031	0.0312093	0.100002	201	2
3	1	0.0329525	0.216083	0.180069	0.0720277	0.109842	0.142794	0.120826	0.180069	0.0540208	0.109842	202	1
3	1	0.0449468	0.152592	0.12716	0.0508638	0.149823	0.194769	0.164805	0.12716	0.0381479	0.149823	203	6
3	1	0.0345	0.197397	0.164497	0.0657989	0.115	0.1495	0.1265	0.164497	0.0493492	0.115	204	3
3	1	0.0393312	0.168318	0.140265	0.0561061	0.131104	0.170435	0.144214	0.140265	0.0420796	0.131104	205	1
3	1	0.0336653	0.206361	0.171968	0.0687871	0.112218	0.145883	0.123439	0.171968	0.0515903	0.112218	206	2
3	1	0.0354698	0.189149	0.157624	0.0630496	0.118233	0.153702	0.130056	0.157624	0.0472872	0.118233	207	1
3	1	0.0336653	0.206361	0.171968	0.0687871	0.112218	0.145883	0.123439	0.171968	0.0515903	0.112218	208	3
3	1	0.0393312	0.168318	0.140265	0.0561061	0.131104	0.170435	0.144214	0.140265	0.0420796	0.131104	209	6
3	1	0.0329525	0.216083	0.180069	0.0720277	0.109842	0.142794	0.120826	0.180069	0.0540208	0.109842	210	1
3	1	0.0300005	0.126005	0.105004	0.0420017	0.100002	0.130002	0.110002	0.105004	0.0315013	0.100002	211	3
3	1	0.0329525	0.226603	0.188836	0.0755345	0.109842	0.142794	0.120826	0.188836	0.0566508	0.109842	212	5
3	1	0.0449468	0.157325	0.131104	0.0524416	0.149823	0.194769	0.164805	0.131104	0.0393312	0.149823	213	2
3	1	0.0345	0.206361	0.171968	0.0687871	0.115	0.1495	0.1265	0.171968	0.0515903	0.115	214	3
3	1	0.0409863	0.168318	0.140265	0.0561061	0.136621	0.177607	0.150283	0.140265	0.0420796	0.136621	215	6
3	1	0.0336653	0.216083	0.180069	0.0720277	0.112218	0.145883	0.123439	0.180069	0.0540208	0.112218	216	1
3	2	0.0365885	0.189149	0.157624	0.0630496	0.121962	0.15855	0.134158	0.157624	0.0472872	0.121962	1	5
3	2	0.0336653	0.216083	0.180069	0.0720277	0.112218	0.145883	0.123439	0.180069	0.0540208	0.112218	2	3
3	2	0.0393312	0.174647	0.145539	0.0582157	0.131104	0.170435	0.144214	0.145539	0.0436618	0.131104	3	2
3	2	0.0329525	0.226603	0.188836	0.0755345	0.109842	0.142794	0.120826	0.188836	0.0566508	0.109842	4	1
3	2	0.0300005	0.127373	0.106144	0.0424576	0.100002	0.130002	0.110002	0.106144	0.0318432	0.100002	5	5
3	2	0.0336653	0.226603	0.188836	0.0755345	0.112218	0.145883	0.123439	0.188836	0.0566508	0.112218	6	5
3	2	0.0449468	0.162556	0.135463	0.0541853	0.149823	0.194769	0.164805	0.135463	0.040639	0.149823	7	3
3	2	0.0354698	0.206361	0.171968	0.0687871	0.118233	0.153702	0.130056	0.171968	0.0515903	0.118233	8	1
3	2	0.0409863	0.174647	0.145539	0.0582157	0.136621	0.177607	0.150283	0.145539	0.0436618	0.136621	9	5
3	2	0.0345	0.216083	0.180069	0.0720277	0.115	0.1495	0.1265	0.180069	0.0540208	0.115	10	1
3	2	0.0365885	0.197397	0.164497	0.0657989	0.121962	0.15855	0.134158	0.164497	0.0493492	0.121962	11	6
3	2	0.0336653	0.226603	0.188836	0.0755345	0.112218	0.145883	0.123439	0.188836	0.0566508	0.112218	12	1
3	2	0.0393312	0.181578	0.151315	0.0605261	0.131104	0.170435	0.144214	0.151315	0.0453946	0.131104	13	5
3	2	0.0336653	0.226603	0.188836	0.0755345	0.112218	0.145883	0.123439	0.188836	0.0566508	0.112218	14	1
3	2	0.0300023	0.127373	0.106144	0.0424576	0.100008	0.13001	0.110008	0.106144	0.0318432	0.100008	15	6
3	2	0.0345	0.226603	0.188836	0.0755345	0.115	0.1495	0.1265	0.188836	0.0566508	0.115	16	4
3	2	0.0472872	0.162556	0.135463	0.0541853	0.157624	0.204911	0.173386	0.135463	0.040639	0.157624	17	6
3	2	0.0365885	0.206361	0.171968	0.0687871	0.121962	0.15855	0.134158	0.171968	0.0515903	0.121962	18	5
3	2	0.0428525	0.174647	0.145539	0.0582157	0.142842	0.185694	0.157126	0.145539	0.0436618	0.142842	19	3
3	2	0.0354698	0.216083	0.180069	0.0720277	0.118233	0.153702	0.130056	0.180069	0.0540208	0.118233	20	1
3	2	0.0378705	0.197397	0.164497	0.0657989	0.126235	0.164106	0.138859	0.164497	0.0493492	0.126235	21	1
3	2	0.0345	0.226603	0.188836	0.0755345	0.115	0.1495	0.1265	0.188836	0.0566508	0.115	22	6
3	2	0.0409863	0.181578	0.151315	0.0605261	0.136621	0.177607	0.150283	0.151315	0.0453946	0.136621	23	4
3	2	0.0345	0.226603	0.188836	0.0755345	0.115	0.1495	0.1265	0.188836	0.0566508	0.115	24	4
3	2	0.0300023	0.128962	0.107468	0.0429872	0.100008	0.13001	0.110008	0.107468	0.0322404	0.100008	25	3
3	2	0.0354698	0.226603	0.188836	0.0755345	0.118233	0.153702	0.130056	0.188836	0.0566508	0.118233	26	5
3	2	0.0472872	0.168318	0.140265	0.0561061	0.157624	0.204911	0.173386	0.140265	0.0420796	0.157624	27	6
3	2	0.0378705	0.206361	0.171968	0.0687871	0.126235	0.164106	0.138859	0.171968	0.0515903	0.126235	28	6
3	2	0.0428525	0.181578	0.151315	0.0605261	0.142842	0.185694	0.157126	0.151315	0.0453946	0.142842	29	2
3	2	0.0365885	0.216083	0.180069	0.0720277	0.121962	0.15855	0.134158	0.180069	0.0540208	0.121962	30	6
3	2	0.0393312	0.197397	0.164497	0.0657989	0.131104	0.170435	0.144214	0.164497	0.0493492	0.131104	31	3
3	2	0.0345	0.237965	0.198304	0.0793216	0.115	0.1495	0.1265	0.198304	0.0594912	0.115	32	6
3	2	0.0428525	0.181578	0.151315	0.0605261	0.142842	0.185694	0.157126	0.151315	0.0453946	0.142842	33	3
3	2	0.0345	0.237965	0.198304	0.0793216	0.115	0.1495	0.1265	0.198304	0.0594912	0.115	34	1
3	2	0.0300023	0.130795	0.108995	0.0435982	0.100008	0.13001	0.110008	0.108995	0.0326986	0.100008	35	2
3	2	0.0365885	0.226603	0.188836	0.0755345	0.121962	0.15855	0.134158	0.188836	0.0566508	0.121962	36	5
3	2	0.0472872	0.174647	0.145539	0.0582157	0.157624	0.204911	0.173386	0.145539	0.0436618	0.157624	37	6
3	2	0.0378705	0.216083	0.180069	0.0720277	0.126235	0.164106	0.138859	0.180069	0.0540208	0.126235	38	6
3	2	0.0428525	0.189149	0.157624	0.0630496	0.142842	0.185694	0.157126	0.157624	0.0472872	0.142842	39	3
3	2	0.0365885	0.226603	0.188836	0.0755345	0.121962	0.15855	0.134158	0.188836	0.0566508	0.121962	40	2
3	2	0.0393312	0.206361	0.171968	0.0687871	0.131104	0.170435	0.144214	0.171968	0.0515903	0.131104	41	5
3	2	0.0345	0.250211	0.208509	0.0834037	0.115	0.1495	0.1265	0.208509	0.0625528	0.115	42	5
3	2	0.0428525	0.189149	0.157624	0.0630496	0.142842	0.185694	0.157126	0.157624	0.0472872	0.142842	43	2
3	2	0.0354698	0.237965	0.198304	0.0793216	0.118233	0.153702	0.130056	0.198304	0.0594912	0.118233	44	3
3	2	0.0300023	0.132895	0.110746	0.0442984	0.100008	0.13001	0.110008	0.110746	0.0332238	0.100008	45	6
3	2	0.0378705	0.226603	0.188836	0.0755345	0.126235	0.164106	0.138859	0.188836	0.0566508	0.126235	46	1
3	2	0.0472872	0.181578	0.151315	0.0605261	0.157624	0.204911	0.173386	0.151315	0.0453946	0.157624	47	3
3	2	0.0378705	0.226603	0.188836	0.0755345	0.126235	0.164106	0.138859	0.188836	0.0566508	0.126235	48	6
3	2	0.0428525	0.197397	0.164497	0.0657989	0.142842	0.185694	0.157126	0.164497	0.0493492	0.142842	49	5
3	2	0.0365885	0.237965	0.198304	0.0793216	0.121962	0.15855	0.134158	0.198304	0.0594912	0.121962	50	1
3	2	0.0393312	0.216083	0.180069	0.0720277	0.131104	0.170435	0.144214	0.180069	0.0540208	0.131104	51	2
3	2	0.0354698	0.250211	0.208509	0.0834037	0.118233	0.153702	0.130056	0.208509	0.0625528	0.118233	52	5
3	2	0.0428525	0.197397	0.164497	0.0657989	0.142842	0.185694	0.157126	0.164497	0.0493492	0.142842	53	5
3	2	0.0365885	0.237965	0.198304	0.0793216	0.121962	0.15855	0.134158	0.198304	0.0594912	0.121962	54	3
3	2	0.0300023	0.135288	0.11274	0.0450961	0.100008	0.13001	0.110008	0.11274	0.0338221	0.100008	55	2
3	2	0.0393312	0.226603	0.188836	0.0755345	0.131104	0.170435	0.144214	0.188836	0.0566508	0.131104	56	1
3	2	0.0472872	0.189149	0.157624	0.0630496	0.157624	0.204911	0.173386	0.157624	0.0472872	0.157624	57	5
3	2	0.0393312	0.226603	0.188836	0.0755345	0.131104	0.170435	0.144214	0.188836	0.0566508	0.131104	58	3
3	2	0.0428525	0.206361	0.171968	0.0687871	0.142842	0.185694	0.157126	0.171968	0.0515903	0.142842	59	3
3	2	0.0378705	0.237965	0.198304	0.0793216	0.126235	0.164106	0.138859	0.198304	0.0594912	0.126235	60	5
3	2	0.0393312	0.226603	0.188836	0.0755345	0.131104	0.170435	0.144214	0.188836	0.0566508	0.131104	61	3
3	2	0.0354698	0.263387	0.219489	0.0877957	0.118233	0.153702	0.130056	0.219489	0.0658467	0.118233	62	3
3	2	0.0428525	0.206361	0.171968	0.0687871	0.142842	0.185694	0.157126	0.171968	0.0515903	0.142842	63	6
3	2	0.0378705	0.237965	0.198304	0.0793216	0.126235	0.164106	0.138859	0.198304	0.0594912	0.126235	64	1
3	2	0.0300023	0.138	0.115	0.046	0.100008	0.13001	0.110008	0.115	0.0345	0.100008	65	4
3	2	0.0409863	0.226603	0.188836	0.0755345	0.136621	0.177607	0.150283	0.188836	0.0566508	0.136621	66	5
3	2	0.0472872	0.197397	0.164497	0.0657989	0.157624	0.204911	0.173386	0.164497	0.0493492	0.157624	67	1
3	2	0.0393312	0.237965	0.198304	0.0793216	0.131104	0.170435	0.144214	0.198304	0.0594912	0.131104	68	3
3	2	0.0449468	0.206361	0.171968	0.0687871	0.149823	0.194769	0.164805	0.171968	0.0515903	0.149823	69	2
3	2	0.0378705	0.250211	0.208509	0.0834037	0.126235	0.164106	0.138859	0.208509	0.0625528	0.126235	70	3
3	2	0.0393312	0.237965	0.198304	0.0793216	0.131104	0.170435	0.144214	0.198304	0.0594912	0.131104	71	5
3	2	0.0365885	0.263387	0.219489	0.0877957	0.121962	0.15855	0.134158	0.219489	0.0658467	0.121962	72	1
3	2	0.0428525	0.216083	0.180069	0.0720277	0.142842	0.185694	0.157126	0.180069	0.0540208	0.142842	73	6
3	2	0.0393312	0.237965	0.198304	0.0793216	0.131104	0.170435	0.144214	0.198304	0.0594912	0.131104	74	5
3	2	0.0300072	0.138	0.115	0.046	0.100024	0.130031	0.110026	0.115	0.0345	0.100024	75	2
3	2	0.0409863	0.237965	0.198304	0.0793216	0.136621	0.177607	0.150283	0.198304	0.0594912	0.136621	76	5
3	2	0.0498923	0.197397	0.164497	0.0657989	0.166308	0.2162	0.182938	0.164497	0.0493492	0.166308	77	3
3	2	0.0409863	0.237965	0.198304	0.0793216	0.136621	0.177607	0.150283	0.198304	0.0594912	0.136621	78	1
3	2	0.0449468	0.216083	0.180069	0.0720277	0.149823	0.194769	0.164805	0.180069	0.0540208	0.149823	79	4
3	2	0.0378705	0.263387	0.219489	0.0877957	0.126235	0.164106	0.138859	0.219489	0.0658467	0.126235	80	3
3	2	0.0409863	0.237965	0.198304	0.0793216	0.136621	0.177607	0.150283	0.198304	0.0594912	0.136621	81	1
3	2	0.0378705	0.263387	0.219489	0.0877957	0.126235	0.164106	0.138859	0.219489	0.0658467	0.126235	82	1
3	2	0.0449468	0.216083	0.180069	0.0720277	0.149823	0.194769	0.164805	0.180069	0.0540208	0.149823	83	5
3	2	0.0393312	0.250211	0.208509	0.0834037	0.131104	0.170435	0.144214	0.208509	0.0625528	0.131104	84	2
3	2	0.0300072	0.141057	0.117548	0.0470192	0.100024	0.130031	0.110026	0.117548	0.0352644	0.100024	85	3
3	2	0.0409863	0.250211	0.208509	0.0834037	0.136621	0.177607	0.150283	0.208509	0.0625528	0.136621	86	1
3	2	0.0498923	0.206361	0.171968	0.0687871	0.166308	0.2162	0.182938	0.171968	0.0515903	0.166308	87	5
3	2	0.0428525	0.237965	0.198304	0.0793216	0.142842	0.185694	0.157126	0.198304	0.0594912	0.142842	88	4
3	2	0.0472872	0.216083	0.180069	0.0720277	0.157624	0.204911	0.173386	0.180069	0.0540208	0.157624	89	3
3	2	0.0393312	0.263387	0.219489	0.0877957	0.131104	0.170435	0.144214	0.219489	0.0658467	0.131104	90	5
3	2	0.0428525	0.237965	0.198304	0.0793216	0.142842	0.185694	0.157126	0.198304	0.0594912	0.142842	91	3
3	2	0.0378705	0.277538	0.231282	0.0925128	0.126235	0.164106	0.138859	0.231282	0.0693846	0.126235	92	1
3	2	0.0449468	0.226603	0.188836	0.0755345	0.149823	0.194769	0.164805	0.188836	0.0566508	0.149823	93	2
3	2	0.0393312	0.263387	0.219489	0.0877957	0.131104	0.170435	0.144214	0.219489	0.0658467	0.131104	94	4
3	2	0.0300072	0.144489	0.120407	0.0481629	0.100024	0.130031	0.110026	0.120407	0.0361222	0.100024	95	2
3	2	0.0428525	0.250211	0.208509	0.0834037	0.142842	0.185694	0.157126	0.208509	0.0625528	0.142842	96	5
3	2	0.0498923	0.216083	0.180069	0.0720277	0.166308	0.2162	0.182938	0.180069	0.0540208	0.166308	97	3
3	2	0.0449468	0.237965	0.198304	0.0793216	0.149823	0.194769	0.164805	0.198304	0.0594912	0.149823	98	3
3	2	0.0472872	0.226603	0.188836	0.0755345	0.157624	0.204911	0.173386	0.188836	0.0566508	0.157624	99	2
3	2	0.0409863	0.263387	0.219489	0.0877957	0.136621	0.177607	0.150283	0.219489	0.0658467	0.136621	100	4
3	2	0.0428525	0.250211	0.208509	0.0834037	0.142842	0.185694	0.157126	0.208509	0.0625528	0.142842	101	4
3	2	0.0393312	0.277538	0.231282	0.0925128	0.131104	0.170435	0.144214	0.231282	0.0693846	0.131104	102	3
3	2	0.0449468	0.237965	0.198304	0.0793216	0.149823	0.194769	0.164805	0.198304	0.0594912	0.149823	103	3
3	2	0.0393312	0.277538	0.231282	0.0925128	0.131104	0.170435	0.144214	0.231282	0.0693846	0.131104	104	4
3	2	0.0300072	0.148323	0.123603	0.0494411	0.100024	0.130031	0.110026	0.123603	0.0370808	0.100024	105	2
3	2	0.0449468	0.250211	0.208509	0.0834037	0.149823	0.194769	0.164805	0.208509	0.0625528	0.149823	106	3
3	2	0.0498923	0.226603	0.188836	0.0755345	0.166308	0.2162	0.182938	0.188836	0.0566508	0.166308	107	4
3	2	0.0449468	0.250211	0.208509	0.0834037	0.149823	0.194769	0.164805	0.208509	0.0625528	0.149823	108	1
3	2	0.0472872	0.237965	0.198304	0.0793216	0.157624	0.204911	0.173386	0.198304	0.0594912	0.157624	109	2
3	2	0.0428525	0.263387	0.219489	0.0877957	0.142842	0.185694	0.157126	0.219489	0.0658467	0.142842	110	4
3	2	0.0428525	0.263387	0.219489	0.0877957	0.142842	0.185694	0.157126	0.219489	0.0658467	0.142842	111	5
3	2	0.0393312	0.292712	0.243927	0.0975708	0.131104	0.170435	0.144214	0.243927	0.0731781	0.131104	112	6
3	2	0.0449468	0.250211	0.208509	0.0834037	0.149823	0.194769	0.164805	0.208509	0.0625528	0.149823	113	2
3	2	0.0393312	0.292712	0.243927	0.0975708	0.131104	0.170435	0.144214	0.243927	0.0731781	0.131104	114	5
3	2	0.0300072	0.152592	0.12716	0.0508638	0.100024	0.130031	0.110026	0.12716	0.0381479	0.100024	115	1
3	2	0.0449468	0.263387	0.219489	0.0877957	0.149823	0.194769	0.164805	0.219489	0.0658467	0.149823	116	3
3	2	0.0498923	0.237965	0.198304	0.0793216	0.166308	0.2162	0.182938	0.198304	0.0594912	0.166308	117	3
3	2	0.0472872	0.250211	0.208509	0.0834037	0.157624	0.204911	0.173386	0.208509	0.0625528	0.157624	118	6
3	2	0.0472872	0.250211	0.208509	0.0834037	0.157624	0.204911	0.173386	0.208509	0.0625528	0.157624	119	1
3	2	0.0428525	0.277538	0.231282	0.0925128	0.142842	0.185694	0.157126	0.231282	0.0693846	0.142842	120	4
3	2	0.0428525	0.277538	0.231282	0.0925128	0.142842	0.185694	0.157126	0.231282	0.0693846	0.142842	121	5
3	2	0.0409863	0.292712	0.243927	0.0975708	0.136621	0.177607	0.150283	0.243927	0.0731781	0.136621	122	3
3	2	0.0449468	0.263387	0.219489	0.0877957	0.149823	0.194769	0.164805	0.219489	0.0658467	0.149823	123	1
3	2	0.0409863	0.292712	0.243927	0.0975708	0.136621	0.177607	0.150283	0.243927	0.0731781	0.136621	124	6
3	2	0.0300176	0.152592	0.12716	0.0508638	0.100059	0.130076	0.110064	0.12716	0.0381479	0.100059	125	4
3	2	0.0472872	0.263387	0.219489	0.0877957	0.157624	0.204911	0.173386	0.219489	0.0658467	0.157624	126	6
3	2	0.0498923	0.250211	0.208509	0.0834037	0.166308	0.2162	0.182938	0.208509	0.0625528	0.166308	127	2
3	2	0.0472872	0.263387	0.219489	0.0877957	0.157624	0.204911	0.173386	0.219489	0.0658467	0.157624	128	3
3	2	0.0498923	0.250211	0.208509	0.0834037	0.166308	0.2162	0.182938	0.208509	0.0625528	0.166308	129	2
3	2	0.0428525	0.292712	0.243927	0.0975708	0.142842	0.185694	0.157126	0.243927	0.0731781	0.142842	130	4
3	2	0.0428525	0.292712	0.243927	0.0975708	0.142842	0.185694	0.157126	0.243927	0.0731781	0.142842	131	4
3	2	0.0409863	0.308957	0.257464	0.102986	0.136621	0.177607	0.150283	0.257464	0.0772392	0.136621	132	1
3	2	0.0472872	0.263387	0.219489	0.0877957	0.157624	0.204911	0.173386	0.219489	0.0658467	0.157624	133	5
3	2	0.0428525	0.292712	0.243927	0.0975708	0.142842	0.185694	0.157126	0.243927	0.0731781	0.142842	134	3
3	2	0.0300176	0.157325	0.131104	0.0524416	0.100059	0.130076	0.110064	0.131104	0.0393312	0.100059	135	4
3	2	0.0472872	0.277538	0.231282	0.0925128	0.157624	0.204911	0.173386	0.231282	0.0693846	0.157624	136	3
3	2	0.0498923	0.263387	0.219489	0.0877957	0.166308	0.2162	0.182938	0.219489	0.0658467	0.166308	137	4
3	2	0.0472872	0.277538	0.231282	0.0925128	0.157624	0.204911	0.173386	0.231282	0.0693846	0.157624	138	2
3	2	0.0498923	0.263387	0.219489	0.0877957	0.166308	0.2162	0.182938	0.219489	0.0658467	0.166308	139	4
3	2	0.0428525	0.308957	0.257464	0.102986	0.142842	0.185694	0.157126	0.257464	0.0772392	0.142842	140	1
3	2	0.0449468	0.292712	0.243927	0.0975708	0.149823	0.194769	0.164805	0.243927	0.0731781	0.149823	141	5
3	2	0.0428525	0.308957	0.257464	0.102986	0.142842	0.185694	0.157126	0.257464	0.0772392	0.142842	142	1
3	2	0.0472872	0.277538	0.231282	0.0925128	0.157624	0.204911	0.173386	0.231282	0.0693846	0.157624	143	4
3	2	0.0428525	0.308957	0.257464	0.102986	0.142842	0.185694	0.157126	0.257464	0.0772392	0.142842	144	6
3	2	0.03	0.12	0.1	0.04	0.1	0.13	0.11	0.1	0.03	0.1	145	2
3	2	0.0300176	0.162556	0.135463	0.0541853	0.100059	0.130076	0.110064	0.135463	0.040639	0.100059	146	5
3	2	0.0378705	0.121316	0.101097	0.0404387	0.126235	0.164106	0.138859	0.101097	0.030329	0.126235	147	3
3	2	0.0300675	0.152592	0.12716	0.0508638	0.100225	0.130293	0.110248	0.12716	0.0381479	0.100225	148	3
3	2	0.0354698	0.122333	0.101944	0.0407776	0.118233	0.153702	0.130056	0.101944	0.0305832	0.118233	149	4
3	2	0.0301152	0.148323	0.123603	0.0494411	0.100384	0.130499	0.110422	0.123603	0.0370808	0.100384	150	2
3	2	0.0336653	0.123849	0.103207	0.0412829	0.112218	0.145883	0.123439	0.103207	0.0309622	0.112218	151	4
3	2	0.0301845	0.144489	0.120407	0.0481629	0.100615	0.1308	0.110677	0.120407	0.0361222	0.100615	152	2
3	2	0.0329525	0.124837	0.104031	0.0416124	0.109842	0.142794	0.120826	0.104031	0.0312093	0.109842	153	4
3	2	0.0302813	0.141057	0.117548	0.0470192	0.100938	0.131219	0.111031	0.117548	0.0352644	0.100938	154	1
3	2	0.03	0.12	0.1	0.04	0.1	0.13	0.11	0.1	0.03	0.1	155	5
3	2	0.0300365	0.162556	0.135463	0.0541853	0.100122	0.130158	0.110134	0.135463	0.040639	0.100122	156	2
3	2	0.0378705	0.12177	0.101475	0.0405901	0.126235	0.164106	0.138859	0.101475	0.0304426	0.126235	157	4
3	2	0.0300675	0.157325	0.131104	0.0524416	0.100225	0.130293	0.110248	0.131104	0.0393312	0.100225	158	6
3	2	0.0354698	0.12302	0.102517	0.0410066	0.118233	0.153702	0.130056	0.102517	0.030755	0.118233	159	4
3	2	0.0301152	0.152592	0.12716	0.0508638	0.100384	0.130499	0.110422	0.12716	0.0381479	0.100384	160	4
3	2	0.0336653	0.124837	0.104031	0.0416124	0.112218	0.145883	0.123439	0.104031	0.0312093	0.112218	161	2
3	2	0.0301845	0.148323	0.123603	0.0494411	0.100615	0.1308	0.110677	0.123603	0.0370808	0.100615	162	2
3	2	0.0329525	0.126005	0.105004	0.0420017	0.109842	0.142794	0.120826	0.105004	0.0315013	0.109842	163	1
3	2	0.0304118	0.141057	0.117548	0.0470192	0.101373	0.131784	0.11151	0.117548	0.0352644	0.101373	164	1
3	2	0.03	0.120001	0.100001	0.0400002	0.1	0.13	0.11	0.100001	0.0300002	0.1	165	4
3	2	0.0300365	0.168318	0.140265	0.0561061	0.100122	0.130158	0.110134	0.140265	0.0420796	0.100122	166	4
3	2	0.0378705	0.122333	0.101944	0.0407776	0.126235	0.164106	0.138859	0.101944	0.0305832	0.126235	167	2
3	2	0.0300675	0.162556	0.135463	0.0541853	0.100225	0.130293	0.110248	0.135463	0.040639	0.100225	168	2
3	2	0.0354698	0.123849	0.103207	0.0412829	0.118233	0.153702	0.130056	0.103207	0.0309622	0.118233	169	4
3	2	0.0301152	0.157325	0.131104	0.0524416	0.100384	0.130499	0.110422	0.131104	0.0393312	0.100384	170	4
3	2	0.0336653	0.126005	0.105004	0.0420017	0.112218	0.145883	0.123439	0.105004	0.0315013	0.112218	171	1
3	2	0.0301845	0.152592	0.12716	0.0508638	0.100615	0.1308	0.110677	0.12716	0.0381479	0.100615	172	2
3	2	0.0336653	0.126005	0.105004	0.0420017	0.112218	0.145883	0.123439	0.105004	0.0315013	0.112218	173	4
3	2	0.0304118	0.144489	0.120407	0.0481629	0.101373	0.131784	0.11151	0.120407	0.0361222	0.101373	174	5
3	2	0.03	0.120004	0.100003	0.0400012	0.1	0.13	0.11	0.100003	0.0300009	0.1	175	2
3	2	0.0300365	0.174647	0.145539	0.0582157	0.100122	0.130158	0.110134	0.145539	0.0436618	0.100122	176	5
3	2	0.0378705	0.12302	0.102517	0.0410066	0.126235	0.164106	0.138859	0.102517	0.030755	0.126235	177	4
3	2	0.0300675	0.168318	0.140265	0.0561061	0.100225	0.130293	0.110248	0.140265	0.0420796	0.100225	178	5
3	2	0.0354698	0.124837	0.104031	0.0416124	0.118233	0.153702	0.130056	0.104031	0.0312093	0.118233	179	1
3	2	0.0301152	0.162556	0.135463	0.0541853	0.100384	0.130499	0.110422	0.135463	0.040639	0.100384	180	3
3	2	0.0336653	0.127373	0.106144	0.0424576	0.112218	0.145883	0.123439	0.106144	0.0318432	0.112218	181	2
3	2	0.0301845	0.157325	0.131104	0.0524416	0.100615	0.1308	0.110677	0.131104	0.0393312	0.100615	182	1
3	2	0.0336653	0.127373	0.106144	0.0424576	0.112218	0.145883	0.123439	0.106144	0.0318432	0.112218	183	4
3	2	0.0304118	0.148323	0.123603	0.0494411	0.101373	0.131784	0.11151	0.123603	0.0370808	0.101373	184	6
3	2	0.03	0.120012	0.10001	0.0400039	0.1	0.13	0.11	0.10001	0.0300029	0.1	185	4
3	2	0.0300675	0.174647	0.145539	0.0582157	0.100225	0.130293	0.110248	0.145539	0.0436618	0.100225	186	1
3	2	0.0378705	0.123849	0.103207	0.0412829	0.126235	0.164106	0.138859	0.103207	0.0309622	0.126235	187	1
3	2	0.0300675	0.174647	0.145539	0.0582157	0.100225	0.130293	0.110248	0.145539	0.0436618	0.100225	188	1
3	2	0.0354698	0.126005	0.105004	0.0420017	0.118233	0.153702	0.130056	0.105004	0.0315013	0.118233	189	5
3	2	0.0301845	0.162556	0.135463	0.0541853	0.100615	0.1308	0.110677	0.135463	0.040639	0.100615	190	4
3	2	0.0336653	0.128962	0.107468	0.0429872	0.112218	0.145883	0.123439	0.107468	0.0322404	0.112218	191	4
3	2	0.0302813	0.157325	0.131104	0.0524416	0.100938	0.131219	0.111031	0.131104	0.0393312	0.100938	192	2
3	2	0.0345	0.127373	0.106144	0.0424576	0.115	0.1495	0.1265	0.106144	0.0318432	0.115	193	4
3	2	0.0305832	0.148323	0.123603	0.0494411	0.101944	0.132527	0.112138	0.123603	0.0370808	0.101944	194	5
3	2	0.03	0.120029	0.100024	0.0400096	0.1	0.13	0.11	0.100024	0.0300072	0.1	195	1
3	2	0.0301152	0.174647	0.145539	0.0582157	0.100384	0.130499	0.110422	0.145539	0.0436618	0.100384	196	6
3	2	0.0378705	0.124837	0.104031	0.0416124	0.126235	0.164106	0.138859	0.104031	0.0312093	0.126235	197	5
3	2	0.0301152	0.174647	0.145539	0.0582157	0.100384	0.130499	0.110422	0.145539	0.0436618	0.100384	198	1
3	2	0.0354698	0.127373	0.106144	0.0424576	0.118233	0.153702	0.130056	0.106144	0.0318432	0.118233	199	2
3	2	0.0302813	0.162556	0.135463	0.0541853	0.100938	0.131219	0.111031	0.135463	0.040639	0.100938	200	1
3	2	0.0336653	0.130795	0.108995	0.0435982	0.112218	0.145883	0.123439	0.108995	0.0326986	0.112218	201	6
3	2	0.0302813	0.162556	0.135463	0.0541853	0.100938	0.131219	0.111031	0.135463	0.040639	0.100938	202	6
3	2	0.0345	0.128962	0.107468	0.0429872	0.115	0.1495	0.1265	0.107468	0.0322404	0.115	203	5
3	2	0.0308033	0.148323	0.123603	0.0494411	0.102678	0.133481	0.112945	0.123603	0.0370808	0.102678	204	3
3	2	0.03	0.120029	0.100024	0.0400096	0.1	0.13	0.11	0.100024	0.0300072	0.1	205	2
3	2	0.0301845	0.174647	0.145539	0.0582157	0.100615	0.1308	0.110677	0.145539	0.0436618	0.100615	206	5
3	2	0.0393312	0.124837	0.104031	0.0416124	0.131104	0.170435	0.144214	0.104031	0.0312093	0.131104	207	6
3	2	0.0301845	0.174647	0.145539	0.0582157	0.100615	0.1308	0.110677	0.145539	0.0436618	0.100615	208	3
3	2	0.0354698	0.128962	0.107468	0.0429872	0.118233	0.153702	0.130056	0.107468	0.0322404	0.118233	209	3
3	2	0.0304118	0.162556	0.135463	0.0541853	0.101373	0.131784	0.11151	0.135463	0.040639	0.101373	210	5
3	2	0.0336653	0.132895	0.110746	0.0442984	0.112218	0.145883	0.123439	0.110746	0.0332238	0.112218	211	2
3	2	0.0304118	0.162556	0.135463	0.0541853	0.101373	0.131784	0.11151	0.135463	0.040639	0.101373	212	3
3	2	0.0345	0.130795	0.108995	0.0435982	0.115	0.1495	0.1265	0.108995	0.0326986	0.115	213	1
3	2	0.0308033	0.152592	0.12716	0.0508638	0.102678	0.133481	0.112945	0.12716	0.0381479	0.102678	214	4
3	2	0.03	0.12006	0.10005	0.0400199	0.1	0.13	0.11	0.10005	0.0300149	0.1	215	3
3	2	0.0301845	0.181578	0.151315	0.0605261	0.100615	0.1308	0.110677	0.151315	0.0453946	0.100615	216	5
3	3	0.0393312	0.126005	0.105004	0.0420017	0.131104	0.170435	0.144214	0.105004	0.0315013	0.131104	1	5
3	3	0.0302813	0.174647	0.145539	0.0582157	0.100938	0.131219	0.111031	0.145539	0.0436618	0.100938	2	1
3	3	0.0354698	0.130795	0.108995	0.0435982	0.118233	0.153702	0.130056	0.108995	0.0326986	0.118233	3	5
3	3	0.0304118	0.168318	0.140265	0.0561061	0.101373	0.131784	0.11151	0.140265	0.0420796	0.101373	4	6
3	3	0.0336653	0.135288	0.11274	0.0450961	0.112218	0.145883	0.123439	0.11274	0.0338221	0.112218	5	2
3	3	0.0304118	0.168318	0.140265	0.0561061	0.101373	0.131784	0.11151	0.140265	0.0420796	0.101373	6	5
3	3	0.0354698	0.130795	0.108995	0.0435982	0.118233	0.153702	0.130056	0.108995	0.0326986	0.118233	7	6
3	3	0.0310805	0.152592	0.12716	0.0508638	0.103602	0.134682	0.113962	0.12716	0.0381479	0.103602	8	3
3	3	0.03	0.120111	0.100092	0.0400369	0.1	0.13	0.11	0.100092	0.0300277	0.1	9	2
3	3	0.0302813	0.181578	0.151315	0.0605261	0.100938	0.131219	0.111031	0.151315	0.0453946	0.100938	10	1
3	3	0.0393312	0.127373	0.106144	0.0424576	0.131104	0.170435	0.144214	0.106144	0.0318432	0.131104	11	6
3	3	0.0304118	0.174647	0.145539	0.0582157	0.101373	0.131784	0.11151	0.145539	0.0436618	0.101373	12	6
3	3	0.0365885	0.130795	0.108995	0.0435982	0.121962	0.15855	0.134158	0.108995	0.0326986	0.121962	13	5
3	3	0.0305832	0.168318	0.140265	0.0561061	0.101944	0.132527	0.112138	0.140265	0.0420796	0.101944	14	6
3	3	0.0336653	0.138	0.115	0.046	0.112218	0.145883	0.123439	0.115	0.0345	0.112218	15	2
3	3	0.0304118	0.174647	0.145539	0.0582157	0.101373	0.131784	0.11151	0.145539	0.0436618	0.101373	16	5
3	3	0.0354698	0.132895	0.110746	0.0442984	0.118233	0.153702	0.130056	0.110746	0.0332238	0.118233	17	2
3	3	0.0310805	0.157325	0.131104	0.0524416	0.103602	0.134682	0.113962	0.131104	0.0393312	0.103602	18	1
3	3	0.03	0.120189	0.100157	0.0400629	0.1	0.13	0.11	0.100157	0.0300472	0.1	19	5
3	3	0.0304118	0.181578	0.151315	0.0605261	0.101373	0.131784	0.11151	0.151315	0.0453946	0.101373	20	6
3	3	0.0393312	0.128962	0.107468	0.0429872	0.131104	0.170435	0.144214	0.107468	0.0322404	0.131104	21	1
3	3	0.0304118	0.181578	0.151315	0.0605261	0.101373	0.131784	0.11151	0.151315	0.0453946	0.101373	22	5
3	3	0.0365885	0.132895	0.110746	0.0442984	0.121962	0.15855	0.134158	0.110746	0.0332238	0.121962	23	5
3	3	0.0305832	0.174647	0.145539	0.0582157	0.101944	0.132527	0.112138	0.145539	0.0436618	0.101944	24	2
3	3	0.0336653	0.141057	0.117548	0.0470192	0.112218	0.145883	0.123439	0.117548	0.0352644	0.112218	25	6
3	3	0.0304118	0.181578	0.151315	0.0605261	0.101373	0.131784	0.11151	0.151315	0.0453946	0.101373	26	4
3	3	0.0354698	0.135288	0.11274	0.0450961	0.118233	0.153702	0.130056	0.11274	0.0338221	0.118233	27	2
3	3	0.0314238	0.157325	0.131104	0.0524416	0.104746	0.13617	0.115221	0.131104	0.0393312	0.104746	28	3
3	3	0.03	0.120302	0.100252	0.0401008	0.1	0.13	0.11	0.100252	0.0300756	0.1	29	2
3	3	0.0304118	0.189149	0.157624	0.0630496	0.101373	0.131784	0.11151	0.157624	0.0472872	0.101373	30	1
3	3	0.0393312	0.130795	0.108995	0.0435982	0.131104	0.170435	0.144214	0.108995	0.0326986	0.131104	31	3
3	3	0.0305832	0.181578	0.151315	0.0605261	0.101944	0.132527	0.112138	0.151315	0.0453946	0.101944	32	6
3	3	0.0365885	0.135288	0.11274	0.0450961	0.121962	0.15855	0.134158	0.11274	0.0338221	0.121962	33	1
3	3	0.0305832	0.181578	0.151315	0.0605261	0.101944	0.132527	0.112138	0.151315	0.0453946	0.101944	34	1
3	3	0.0336653	0.144489	0.120407	0.0481629	0.112218	0.145883	0.123439	0.120407	0.0361222	0.112218	35	6
3	3	0.0305832	0.181578	0.151315	0.0605261	0.101944	0.132527	0.112138	0.151315	0.0453946	0.101944	36	1
3	3	0.0354698	0.138	0.115	0.046	0.118233	0.153702	0.130056	0.115	0.0345	0.118233	37	3
3	3	0.0314238	0.162556	0.135463	0.0541853	0.104746	0.13617	0.115221	0.135463	0.040639	0.104746	38	2
3	3	0.03	0.120461	0.100384	0.0401536	0.1	0.13	0.11	0.100384	0.0301152	0.1	39	6
3	3	0.0305832	0.189149	0.157624	0.0630496	0.101944	0.132527	0.112138	0.157624	0.0472872	0.101944	40	5
3	3	0.0409863	0.130795	0.108995	0.0435982	0.136621	0.177607	0.150283	0.108995	0.0326986	0.136621	41	2
3	3	0.0308033	0.181578	0.151315	0.0605261	0.102678	0.133481	0.112945	0.151315	0.0453946	0.102678	42	4
3	3	0.0365885	0.138	0.115	0.046	0.121962	0.15855	0.134158	0.115	0.0345	0.121962	43	1
3	3	0.0308033	0.181578	0.151315	0.0605261	0.102678	0.133481	0.112945	0.151315	0.0453946	0.102678	44	3
3	3	0.0336653	0.148323	0.123603	0.0494411	0.112218	0.145883	0.123439	0.123603	0.0370808	0.112218	45	6
3	3	0.0308033	0.181578	0.151315	0.0605261	0.102678	0.133481	0.112945	0.151315	0.0453946	0.102678	46	1
3	3	0.0354698	0.141057	0.117548	0.0470192	0.118233	0.153702	0.130056	0.117548	0.0352644	0.118233	47	2
3	3	0.0314238	0.168318	0.140265	0.0561061	0.104746	0.13617	0.115221	0.140265	0.0420796	0.104746	48	2
3	3	0.03	0.120675	0.100562	0.0402249	0.1	0.13	0.11	0.100562	0.0301687	0.1	49	6
3	3	0.0308033	0.189149	0.157624	0.0630496	0.102678	0.133481	0.112945	0.157624	0.0472872	0.102678	50	1
3	3	0.0409863	0.132895	0.110746	0.0442984	0.136621	0.177607	0.150283	0.110746	0.0332238	0.136621	51	4
3	3	0.0310805	0.181578	0.151315	0.0605261	0.103602	0.134682	0.113962	0.151315	0.0453946	0.103602	52	4
3	3	0.0365885	0.141057	0.117548	0.0470192	0.121962	0.15855	0.134158	0.117548	0.0352644	0.121962	53	1
3	3	0.0308033	0.189149	0.157624	0.0630496	0.102678	0.133481	0.112945	0.157624	0.0472872	0.102678	54	6
3	3	0.0336653	0.152592	0.12716	0.0508638	0.112218	0.145883	0.123439	0.12716	0.0381479	0.112218	55	6
3	3	0.0310805	0.181578	0.151315	0.0605261	0.103602	0.134682	0.113962	0.151315	0.0453946	0.103602	56	1
3	3	0.0354698	0.144489	0.120407	0.0481629	0.118233	0.153702	0.130056	0.120407	0.0361222	0.118233	57	2
3	3	0.0314238	0.174647	0.145539	0.0582157	0.104746	0.13617	0.115221	0.145539	0.0436618	0.104746	58	2
3	3	0.03	0.120956	0.100796	0.0403185	0.1	0.13	0.11	0.100796	0.0302389	0.1	59	4
3	3	0.0310805	0.189149	0.157624	0.0630496	0.103602	0.134682	0.113962	0.157624	0.0472872	0.103602	60	6
3	3	0.0409863	0.135288	0.11274	0.0450961	0.136621	0.177607	0.150283	0.11274	0.0338221	0.136621	61	1
3	3	0.0314238	0.181578	0.151315	0.0605261	0.104746	0.13617	0.115221	0.151315	0.0453946	0.104746	62	1
3	3	0.0365885	0.144489	0.120407	0.0481629	0.121962	0.15855	0.134158	0.120407	0.0361222	0.121962	63	4
3	3	0.0310805	0.189149	0.157624	0.0630496	0.103602	0.134682	0.113962	0.157624	0.0472872	0.103602	64	5
3	3	0.0336653	0.157325	0.131104	0.0524416	0.112218	0.145883	0.123439	0.131104	0.0393312	0.112218	65	2
3	3	0.0314238	0.181578	0.151315	0.0605261	0.104746	0.13617	0.115221	0.151315	0.0453946	0.104746	66	5
3	3	0.0354698	0.148323	0.123603	0.0494411	0.118233	0.153702	0.130056	0.123603	0.0370808	0.118233	67	3
3	3	0.0314238	0.181578	0.151315	0.0605261	0.104746	0.13617	0.115221	0.151315	0.0453946	0.104746	68	2
3	3	0.03	0.121316	0.101097	0.0404387	0.1	0.13	0.11	0.101097	0.030329	0.1	69	5
3	3	0.0310805	0.197397	0.164497	0.0657989	0.103602	0.134682	0.113962	0.164497	0.0493492	0.103602	70	6
3	3	0.0409863	0.138	0.115	0.046	0.136621	0.177607	0.150283	0.115	0.0345	0.136621	71	6
3	3	0.0318432	0.181578	0.151315	0.0605261	0.106144	0.137987	0.116758	0.151315	0.0453946	0.106144	72	6
3	3	0.0365885	0.148323	0.123603	0.0494411	0.121962	0.15855	0.134158	0.123603	0.0370808	0.121962	73	1
3	3	0.0314238	0.189149	0.157624	0.0630496	0.104746	0.13617	0.115221	0.157624	0.0472872	0.104746	74	5
3	3	0.0336653	0.162556	0.135463	0.0541853	0.112218	0.145883	0.123439	0.135463	0.040639	0.112218	75	1
3	3	0.0314238	0.189149	0.157624	0.0630496	0.104746	0.13617	0.115221	0.157624	0.0472872	0.104746	76	1
3	3	0.0354698	0.152592	0.12716	0.0508638	0.118233	0.153702	0.130056	0.12716	0.0381479	0.118233	77	6
3	3	0.0314238	0.189149	0.157624	0.0630496	0.104746	0.13617	0.115221	0.157624	0.0472872	0.104746	78	5
3	3	0.03	0.12177	0.101475	0.0405901	0.1	0.13	0.11	0.101475	0.0304426	0.1	79	1
3	3	0.0314238	0.197397	0.164497	0.0657989	0.104746	0.13617	0.115221	0.164497	0.0493492	0.104746	80	1
3	3	0.0428525	0.138	0.115	0.046	0.142842	0.185694	0.157126	0.115	0.0345	0.142842	81	2
3	3	0.032349	0.181578	0.151315	0.0605261	0.10783	0.140179	0.118613	0.151315	0.0453946	0.10783	82	6
3	3	0.0365885	0.152592	0.12716	0.0508638	0.121962	0.15855	0.134158	0.12716	0.0381479	0.121962	83	6
3	3	0.0318432	0.189149	0.157624	0.0630496	0.106144	0.137987	0.116758	0.157624	0.0472872	0.106144	84	1
3	3	0.0345	0.162556	0.135463	0.0541853	0.115	0.1495	0.1265	0.135463	0.040639	0.115	85	1
3	3	0.0318432	0.189149	0.157624	0.0630496	0.106144	0.137987	0.116758	0.157624	0.0472872	0.106144	86	4
3	3	0.0365885	0.152592	0.12716	0.0508638	0.121962	0.15855	0.134158	0.12716	0.0381479	0.121962	87	4
3	3	0.0318432	0.189149	0.157624	0.0630496	0.106144	0.137987	0.116758	0.157624	0.0472872	0.106144	88	1
3	3	0.0300005	0.12177	0.101475	0.0405901	0.100002	0.130002	0.110002	0.101475	0.0304426	0.100002	89	5
3	3	0.0318432	0.197397	0.164497	0.0657989	0.106144	0.137987	0.116758	0.164497	0.0493492	0.106144	90	5
3	3	0.0428525	0.141057	0.117548	0.0470192	0.142842	0.185694	0.157126	0.117548	0.0352644	0.142842	91	1
3	3	0.0329525	0.181578	0.151315	0.0605261	0.109842	0.142794	0.120826	0.151315	0.0453946	0.109842	92	2
3	3	0.0378705	0.152592	0.12716	0.0508638	0.126235	0.164106	0.138859	0.12716	0.0381479	0.126235	93	2
3	3	0.032349	0.189149	0.157624	0.0630496	0.10783	0.140179	0.118613	0.157624	0.0472872	0.10783	94	5
3	3	0.0354698	0.162556	0.135463	0.0541853	0.118233	0.153702	0.130056	0.135463	0.040639	0.118233	95	6
3	3	0.032349	0.189149	0.157624	0.0630496	0.10783	0.140179	0.118613	0.157624	0.0472872	0.10783	96	1
3	3	0.0378705	0.152592	0.12716	0.0508638	0.126235	0.164106	0.138859	0.12716	0.0381479	0.126235	97	2
3	3	0.032349	0.189149	0.157624	0.0630496	0.10783	0.140179	0.118613	0.157624	0.0472872	0.10783	98	5
3	3	0.0300005	0.122333	0.101944	0.0407776	0.100002	0.130002	0.110002	0.101944	0.0305832	0.100002	99	4
3	3	0.0318432	0.206361	0.171968	0.0687871	0.106144	0.137987	0.116758	0.171968	0.0515903	0.106144	100	2
3	3	0.0428525	0.144489	0.120407	0.0481629	0.142842	0.185694	0.157126	0.120407	0.0361222	0.142842	101	1
3	3	0.0329525	0.189149	0.157624	0.0630496	0.109842	0.142794	0.120826	0.157624	0.0472872	0.109842	102	1
3	3	0.0378705	0.157325	0.131104	0.0524416	0.126235	0.164106	0.138859	0.131104	0.0393312	0.126235	103	6
3	3	0.032349	0.197397	0.164497	0.0657989	0.10783	0.140179	0.118613	0.164497	0.0493492	0.10783	104	3
3	3	0.0354698	0.168318	0.140265	0.0561061	0.118233	0.153702	0.130056	0.140265	0.0420796	0.118233	105	2
3	3	0.032349	0.197397	0.164497	0.0657989	0.10783	0.140179	0.118613	0.164497	0.0493492	0.10783	106	6
3	3	0.0378705	0.157325	0.131104	0.0524416	0.126235	0.164106	0.138859	0.131104	0.0393312	0.126235	107	2
3	3	0.032349	0.197397	0.164497	0.0657989	0.10783	0.140179	0.118613	0.164497	0.0493492	0.10783	108	5
3	3	0.0300005	0.12302	0.102517	0.0410066	0.100002	0.130002	0.110002	0.102517	0.030755	0.100002	109	5
3	3	0.0318432	0.216083	0.180069	0.0720277	0.106144	0.137987	0.116758	0.180069	0.0540208	0.106144	110	5
3	3	0.0428525	0.148323	0.123603	0.0494411	0.142842	0.185694	0.157126	0.123603	0.0370808	0.142842	111	1
3	3	0.0336653	0.189149	0.157624	0.0630496	0.112218	0.145883	0.123439	0.157624	0.0472872	0.112218	112	2
3	3	0.0378705	0.162556	0.135463	0.0541853	0.126235	0.164106	0.138859	0.135463	0.040639	0.126235	113	4
3	3	0.032349	0.206361	0.171968	0.0687871	0.10783	0.140179	0.118613	0.171968	0.0515903	0.10783	114	4
3	3	0.0354698	0.174647	0.145539	0.0582157	0.118233	0.153702	0.130056	0.145539	0.0436618	0.118233	115	6
3	3	0.032349	0.206361	0.171968	0.0687871	0.10783	0.140179	0.118613	0.171968	0.0515903	0.10783	116	6
3	3	0.0378705	0.162556	0.135463	0.0541853	0.126235	0.164106	0.138859	0.135463	0.040639	0.126235	117	1
3	3	0.032349	0.206361	0.171968	0.0687871	0.10783	0.140179	0.118613	0.171968	0.0515903	0.10783	118	4
3	3	0.0300005	0.123849	0.103207	0.0412829	0.100002	0.130002	0.110002	0.103207	0.0309622	0.100002	119	6
3	3	0.032349	0.216083	0.180069	0.0720277	0.10783	0.140179	0.118613	0.180069	0.0540208	0.10783	120	4
3	3	0.0449468	0.148323	0.123603	0.0494411	0.149823	0.194769	0.164805	0.123603	0.0370808	0.149823	121	2
3	3	0.0336653	0.197397	0.164497	0.0657989	0.112218	0.145883	0.123439	0.164497	0.0493492	0.112218	122	1
3	3	0.0378705	0.168318	0.140265	0.0561061	0.126235	0.164106	0.138859	0.140265	0.0420796	0.126235	123	6
3	3	0.0329525	0.206361	0.171968	0.0687871	0.109842	0.142794	0.120826	0.171968	0.0515903	0.109842	124	1
3	3	0.0354698	0.181578	0.151315	0.0605261	0.118233	0.153702	0.130056	0.151315	0.0453946	0.118233	125	3
3	3	0.0329525	0.206361	0.171968	0.0687871	0.109842	0.142794	0.120826	0.171968	0.0515903	0.109842	126	5
3	3	0.0393312	0.162556	0.135463	0.0541853	0.131104	0.170435	0.144214	0.135463	0.040639	0.131104	127	5
3	3	0.0329525	0.206361	0.171968	0.0687871	0.109842	0.142794	0.120826	0.171968	0.0515903	0.109842	128	3
3	3	0.0300005	0.124837	0.104031	0.0416124	0.100002	0.130002	0.110002	0.104031	0.0312093	0.100002	129	2
3	3	0.0329525	0.216083	0.180069	0.0720277	0.109842	0.142794	0.120826	0.180069	0.0540208	0.109842	130	6
3	3	0.0449468	0.152592	0.12716	0.0508638	0.149823	0.194769	0.164805	0.12716	0.0381479	0.149823	131	2
3	3	0.0345	0.197397	0.164497	0.0657989	0.115	0.1495	0.1265	0.164497	0.0493492	0.115	132	4
3	3	0.0393312	0.168318	0.140265	0.0561061	0.131104	0.170435	0.144214	0.140265	0.0420796	0.131104	133	1
3	3	0.0336653	0.206361	0.171968	0.0687871	0.112218	0.145883	0.123439	0.171968	0.0515903	0.112218	134	4
3	3	0.0354698	0.189149	0.157624	0.0630496	0.118233	0.153702	0.130056	0.157624	0.0472872	0.118233	135	5
3	3	0.0336653	0.206361	0.171968	0.0687871	0.112218	0.145883	0.123439	0.171968	0.0515903	0.112218	136	6
3	3	0.0393312	0.168318	0.140265	0.0561061	0.131104	0.170435	0.144214	0.140265	0.0420796	0.131104	137	5
3	3	0.0329525	0.216083	0.180069	0.0720277	0.109842	0.142794	0.120826	0.180069	0.0540208	0.109842	138	2
3	3	0.0300005	0.126005	0.105004	0.0420017	0.100002	0.130002	0.110002	0.105004	0.0315013	0.100002	139	6
3	3	0.0329525	0.226603	0.188836	0.0755345	0.109842	0.142794	0.120826	0.188836	0.0566508	0.109842	140	1
3	3	0.0449468	0.157325	0.131104	0.0524416	0.149823	0.194769	0.164805	0.131104	0.0393312	0.149823	141	5
3	3	0.0345	0.206361	0.171968	0.0687871	0.115	0.1495	0.1265	0.171968	0.0515903	0.115	142	5
3	3	0.0409863	0.168318	0.140265	0.0561061	0.136621	0.177607	0.150283	0.140265	0.0420796	0.136621	143	2
3	3	0.0336653	0.216083	0.180069	0.0720277	0.112218	0.145883	0.123439	0.180069	0.0540208	0.112218	144	1
3	3	0.0365885	0.189149	0.157624	0.0630496	0.121962	0.15855	0.134158	0.157624	0.0472872	0.121962	145	6
3	3	0.0336653	0.216083	0.180069	0.0720277	0.112218	0.145883	0.123439	0.180069	0.0540208	0.112218	146	3
3	3	0.0393312	0.174647	0.145539	0.0582157	0.131104	0.170435	0.144214	0.145539	0.0436618	0.131104	147	4
3	3	0.0329525	0.226603	0.188836	0.0755345	0.109842	0.142794	0.120826	0.188836	0.0566508	0.109842	148	6
3	3	0.0300005	0.127373	0.106144	0.0424576	0.100002	0.130002	0.110002	0.106144	0.0318432	0.100002	149	1
3	3	0.0336653	0.226603	0.188836	0.0755345	0.112218	0.145883	0.123439	0.188836	0.0566508	0.112218	150	5
3	3	0.0449468	0.162556	0.135463	0.0541853	0.149823	0.194769	0.164805	0.135463	0.040639	0.149823	151	1
3	3	0.0354698	0.206361	0.171968	0.0687871	0.118233	0.153702	0.130056	0.171968	0.0515903	0.118233	152	4
3	3	0.0409863	0.174647	0.145539	0.0582157	0.136621	0.177607	0.150283	0.145539	0.0436618	0.136621	153	1
3	3	0.0345	0.216083	0.180069	0.0720277	0.115	0.1495	0.1265	0.180069	0.0540208	0.115	154	6
3	3	0.0365885	0.197397	0.164497	0.0657989	0.121962	0.15855	0.134158	0.164497	0.0493492	0.121962	155	5
3	3	0.0336653	0.226603	0.188836	0.0755345	0.112218	0.145883	0.123439	0.188836	0.0566508	0.112218	156	1
3	3	0.0393312	0.181578	0.151315	0.0605261	0.131104	0.170435	0.144214	0.151315	0.0453946	0.131104	157	6
3	3	0.0336653	0.226603	0.188836	0.0755345	0.112218	0.145883	0.123439	0.188836	0.0566508	0.112218	158	6
3	3	0.0300023	0.127373	0.106144	0.0424576	0.100008	0.13001	0.110008	0.106144	0.0318432	0.100008	159	2
3	3	0.0345	0.226603	0.188836	0.0755345	0.115	0.1495	0.1265	0.188836	0.0566508	0.115	160	1
3	3	0.0472872	0.162556	0.135463	0.0541853	0.157624	0.204911	0.173386	0.135463	0.040639	0.157624	161	5
3	3	0.0365885	0.206361	0.171968	0.0687871	0.121962	0.15855	0.134158	0.171968	0.0515903	0.121962	162	1
3	3	0.0428525	0.174647	0.145539	0.0582157	0.142842	0.185694	0.157126	0.145539	0.0436618	0.142842	163	3
3	3	0.0354698	0.216083	0.180069	0.0720277	0.118233	0.153702	0.130056	0.180069	0.0540208	0.118233	164	1
3	3	0.0378705	0.197397	0.164497	0.0657989	0.126235	0.164106	0.138859	0.164497	0.0493492	0.126235	165	4
3	3	0.0345	0.226603	0.188836	0.0755345	0.115	0.1495	0.1265	0.188836	0.0566508	0.115	166	4
3	3	0.0409863	0.181578	0.151315	0.0605261	0.136621	0.177607	0.150283	0.151315	0.0453946	0.136621	167	1
3	3	0.0345	0.226603	0.188836	0.0755345	0.115	0.1495	0.1265	0.188836	0.0566508	0.115	168	6
3	3	0.0300023	0.128962	0.107468	0.0429872	0.100008	0.13001	0.110008	0.107468	0.0322404	0.100008	169	2
3	3	0.0354698	0.226603	0.188836	0.0755345	0.118233	0.153702	0.130056	0.188836	0.0566508	0.118233	170	1
3	3	0.0472872	0.168318	0.140265	0.0561061	0.157624	0.204911	0.173386	0.140265	0.0420796	0.157624	171	4
3	3	0.0378705	0.206361	0.171968	0.0687871	0.126235	0.164106	0.138859	0.171968	0.0515903	0.126235	172	5
3	3	0.0428525	0.181578	0.151315	0.0605261	0.142842	0.185694	0.157126	0.151315	0.0453946	0.142842	173	5
3	3	0.0365885	0.216083	0.180069	0.0720277	0.121962	0.15855	0.134158	0.180069	0.0540208	0.121962	174	2
3	3	0.0393312	0.197397	0.164497	0.0657989	0.131104	0.170435	0.144214	0.164497	0.0493492	0.131104	175	5
3	3	0.0345	0.237965	0.198304	0.0793216	0.115	0.1495	0.1265	0.198304	0.0594912	0.115	176	1
3	3	0.0428525	0.181578	0.151315	0.0605261	0.142842	0.185694	0.157126	0.151315	0.0453946	0.142842	177	6
3	3	0.0345	0.237965	0.198304	0.0793216	0.115	0.1495	0.1265	0.198304	0.0594912	0.115	178	5
3	3	0.0300023	0.130795	0.108995	0.0435982	0.100008	0.13001	0.110008	0.108995	0.0326986	0.100008	179	2
3	3	0.0365885	0.226603	0.188836	0.0755345	0.121962	0.15855	0.134158	0.188836	0.0566508	0.121962	180	1
3	3	0.0472872	0.174647	0.145539	0.0582157	0.157624	0.204911	0.173386	0.145539	0.0436618	0.157624	181	2
3	3	0.0378705	0.216083	0.180069	0.0720277	0.126235	0.164106	0.138859	0.180069	0.0540208	0.126235	182	3
3	3	0.0428525	0.189149	0.157624	0.0630496	0.142842	0.185694	0.157126	0.157624	0.0472872	0.142842	183	6
3	3	0.0365885	0.226603	0.188836	0.0755345	0.121962	0.15855	0.134158	0.188836	0.0566508	0.121962	184	1
3	3	0.0393312	0.206361	0.171968	0.0687871	0.131104	0.170435	0.144214	0.171968	0.0515903	0.131104	185	4
3	3	0.0345	0.250211	0.208509	0.0834037	0.115	0.1495	0.1265	0.208509	0.0625528	0.115	186	1
3	3	0.0428525	0.189149	0.157624	0.0630496	0.142842	0.185694	0.157126	0.157624	0.0472872	0.142842	187	2
3	3	0.0354698	0.237965	0.198304	0.0793216	0.118233	0.153702	0.130056	0.198304	0.0594912	0.118233	188	5
3	3	0.0300023	0.132895	0.110746	0.0442984	0.100008	0.13001	0.110008	0.110746	0.0332238	0.100008	189	3
3	3	0.0378705	0.226603	0.188836	0.0755345	0.126235	0.164106	0.138859	0.188836	0.0566508	0.126235	190	6
3	3	0.0472872	0.181578	0.151315	0.0605261	0.157624	0.204911	0.173386	0.151315	0.0453946	0.157624	191	3
3	3	0.0378705	0.226603	0.188836	0.0755345	0.126235	0.164106	0.138859	0.188836	0.0566508	0.126235	192	1
3	3	0.0428525	0.197397	0.164497	0.0657989	0.142842	0.185694	0.157126	0.164497	0.0493492	0.142842	193	2
3	3	0.0365885	0.237965	0.198304	0.0793216	0.121962	0.15855	0.134158	0.198304	0.0594912	0.121962	194	1
3	3	0.0393312	0.216083	0.180069	0.0720277	0.131104	0.170435	0.144214	0.180069	0.0540208	0.131104	195	1
3	3	0.0354698	0.250211	0.208509	0.0834037	0.118233	0.153702	0.130056	0.208509	0.0625528	0.118233	196	3
3	3	0.0428525	0.197397	0.164497	0.0657989	0.142842	0.185694	0.157126	0.164497	0.0493492	0.142842	197	5
3	3	0.0365885	0.237965	0.198304	0.0793216	0.121962	0.15855	0.134158	0.198304	0.0594912	0.121962	198	5
3	3	0.0300023	0.135288	0.11274	0.0450961	0.100008	0.13001	0.110008	0.11274	0.0338221	0.100008	199	2
3	3	0.0393312	0.226603	0.188836	0.0755345	0.131104	0.170435	0.144214	0.188836	0.0566508	0.131104	200	6
3	3	0.0472872	0.189149	0.157624	0.0630496	0.157624	0.204911	0.173386	0.157624	0.0472872	0.157624	201	3
3	3	0.0393312	0.226603	0.188836	0.0755345	0.131104	0.170435	0.144214	0.188836	0.0566508	0.131104	202	1
3	3	0.0428525	0.206361	0.171968	0.0687871	0.142842	0.185694	0.157126	0.171968	0.0515903	0.142842	203	1
3	3	0.0378705	0.237965	0.198304	0.0793216	0.126235	0.164106	0.138859	0.198304	0.0594912	0.126235	204	6
3	3	0.0393312	0.226603	0.188836	0.0755345	0.131104	0.170435	0.144214	0.188836	0.0566508	0.131104	205	2
3	3	0.0354698	0.263387	0.219489	0.0877957	0.118233	0.153702	0.130056	0.219489	0.0658467	0.118233	206	4
3	3	0.0428525	0.206361	0.171968	0.0687871	0.142842	0.185694	0.157126	0.171968	0.0515903	0.142842	207	3
3	3	0.0378705	0.237965	0.198304	0.0793216	0.126235	0.164106	0.138859	0.198304	0.0594912	0.126235	208	6
3	3	0.0300023	0.138	0.115	0.046	0.100008	0.13001	0.110008	0.115	0.0345	0.100008	209	1
3	3	0.0409863	0.226603	0.188836	0.0755345	0.136621	0.177607	0.150283	0.188836	0.0566508	0.136621	210	2
3	3	0.0472872	0.197397	0.164497	0.0657989	0.157624	0.204911	0.173386	0.164497	0.0493492	0.157624	211	1
3	3	0.0393312	0.237965	0.198304	0.0793216	0.131104	0.170435	0.144214	0.198304	0.0594912	0.131104	212	5
3	3	0.0449468	0.206361	0.171968	0.0687871	0.149823	0.194769	0.164805	0.171968	0.0515903	0.149823	213	4
3	3	0.0378705	0.250211	0.208509	0.0834037	0.126235	0.164106	0.138859	0.208509	0.0625528	0.126235	214	3
3	3	0.0393312	0.237965	0.198304	0.0793216	0.131104	0.170435	0.144214	0.198304	0.0594912	0.131104	215	4
3	3	0.0365885	0.263387	0.219489	0.0877957	0.121962	0.15855	0.134158	0.219489	0.0658467	0.121962	216	1
3	4	0.0428525	0.216083	0.180069	0.0720277	0.142842	0.185694	0.157126	0.180069	0.0540208	0.142842	1	1
3	4	0.0393312	0.237965	0.198304	0.0793216	0.131104	0.170435	0.144214	0.198304	0.0594912	0.131104	2	3
3	4	0.0300072	0.138	0.115	0.046	0.100024	0.130031	0.110026	0.115	0.0345	0.100024	3	3
3	4	0.0409863	0.237965	0.198304	0.0793216	0.136621	0.177607	0.150283	0.198304	0.0594912	0.136621	4	2
3	4	0.0498923	0.197397	0.164497	0.0657989	0.166308	0.2162	0.182938	0.164497	0.0493492	0.166308	5	6
3	4	0.0409863	0.237965	0.198304	0.0793216	0.136621	0.177607	0.150283	0.198304	0.0594912	0.136621	6	6
3	4	0.0449468	0.216083	0.180069	0.0720277	0.149823	0.194769	0.164805	0.180069	0.0540208	0.149823	7	4
3	4	0.0378705	0.263387	0.219489	0.0877957	0.126235	0.164106	0.138859	0.219489	0.0658467	0.126235	8	1
3	4	0.0409863	0.237965	0.198304	0.0793216	0.136621	0.177607	0.150283	0.198304	0.0594912	0.136621	9	1
3	4	0.0378705	0.263387	0.219489	0.0877957	0.126235	0.164106	0.138859	0.219489	0.0658467	0.126235	10	4
3	4	0.0449468	0.216083	0.180069	0.0720277	0.149823	0.194769	0.164805	0.180069	0.0540208	0.149823	11	2
3	4	0.0393312	0.250211	0.208509	0.0834037	0.131104	0.170435	0.144214	0.208509	0.0625528	0.131104	12	3
3	4	0.0300072	0.141057	0.117548	0.0470192	0.100024	0.130031	0.110026	0.117548	0.0352644	0.100024	13	4
3	4	0.0409863	0.250211	0.208509	0.0834037	0.136621	0.177607	0.150283	0.208509	0.0625528	0.136621	14	4
3	4	0.0498923	0.206361	0.171968	0.0687871	0.166308	0.2162	0.182938	0.171968	0.0515903	0.166308	15	5
3	4	0.0428525	0.237965	0.198304	0.0793216	0.142842	0.185694	0.157126	0.198304	0.0594912	0.142842	16	4
3	4	0.0472872	0.216083	0.180069	0.0720277	0.157624	0.204911	0.173386	0.180069	0.0540208	0.157624	17	2
3	4	0.0393312	0.263387	0.219489	0.0877957	0.131104	0.170435	0.144214	0.219489	0.0658467	0.131104	18	1
3	4	0.0428525	0.237965	0.198304	0.0793216	0.142842	0.185694	0.157126	0.198304	0.0594912	0.142842	19	3
3	4	0.0378705	0.277538	0.231282	0.0925128	0.126235	0.164106	0.138859	0.231282	0.0693846	0.126235	20	5
3	4	0.0449468	0.226603	0.188836	0.0755345	0.149823	0.194769	0.164805	0.188836	0.0566508	0.149823	21	3
3	4	0.0393312	0.263387	0.219489	0.0877957	0.131104	0.170435	0.144214	0.219489	0.0658467	0.131104	22	5
3	4	0.0300072	0.144489	0.120407	0.0481629	0.100024	0.130031	0.110026	0.120407	0.0361222	0.100024	23	3
3	4	0.0428525	0.250211	0.208509	0.0834037	0.142842	0.185694	0.157126	0.208509	0.0625528	0.142842	24	1
3	4	0.0498923	0.216083	0.180069	0.0720277	0.166308	0.2162	0.182938	0.180069	0.0540208	0.166308	25	2
3	4	0.0449468	0.237965	0.198304	0.0793216	0.149823	0.194769	0.164805	0.198304	0.0594912	0.149823	26	5
3	4	0.0472872	0.226603	0.188836	0.0755345	0.157624	0.204911	0.173386	0.188836	0.0566508	0.157624	27	5
3	4	0.0409863	0.263387	0.219489	0.0877957	0.136621	0.177607	0.150283	0.219489	0.0658467	0.136621	28	5
3	4	0.0428525	0.250211	0.208509	0.0834037	0.142842	0.185694	0.157126	0.208509	0.0625528	0.142842	29	2
3	4	0.0393312	0.277538	0.231282	0.0925128	0.131104	0.170435	0.144214	0.231282	0.0693846	0.131104	30	6
3	4	0.0449468	0.237965	0.198304	0.0793216	0.149823	0.194769	0.164805	0.198304	0.0594912	0.149823	31	6
3	4	0.0393312	0.277538	0.231282	0.0925128	0.131104	0.170435	0.144214	0.231282	0.0693846	0.131104	32	4
3	4	0.0300072	0.148323	0.123603	0.0494411	0.100024	0.130031	0.110026	0.123603	0.0370808	0.100024	33	5
3	4	0.0449468	0.250211	0.208509	0.0834037	0.149823	0.194769	0.164805	0.208509	0.0625528	0.149823	34	2
3	4	0.0498923	0.226603	0.188836	0.0755345	0.166308	0.2162	0.182938	0.188836	0.0566508	0.166308	35	4
3	4	0.0449468	0.250211	0.208509	0.0834037	0.149823	0.194769	0.164805	0.208509	0.0625528	0.149823	36	5
3	4	0.0472872	0.237965	0.198304	0.0793216	0.157624	0.204911	0.173386	0.198304	0.0594912	0.157624	37	3
3	4	0.0428525	0.263387	0.219489	0.0877957	0.142842	0.185694	0.157126	0.219489	0.0658467	0.142842	38	2
3	4	0.0428525	0.263387	0.219489	0.0877957	0.142842	0.185694	0.157126	0.219489	0.0658467	0.142842	39	5
3	4	0.0393312	0.292712	0.243927	0.0975708	0.131104	0.170435	0.144214	0.243927	0.0731781	0.131104	40	1
3	4	0.0449468	0.250211	0.208509	0.0834037	0.149823	0.194769	0.164805	0.208509	0.0625528	0.149823	41	6
3	4	0.0393312	0.292712	0.243927	0.0975708	0.131104	0.170435	0.144214	0.243927	0.0731781	0.131104	42	6
3	4	0.0300072	0.152592	0.12716	0.0508638	0.100024	0.130031	0.110026	0.12716	0.0381479	0.100024	43	1
3	4	0.0449468	0.263387	0.219489	0.0877957	0.149823	0.194769	0.164805	0.219489	0.0658467	0.149823	44	1
3	4	0.0498923	0.237965	0.198304	0.0793216	0.166308	0.2162	0.182938	0.198304	0.0594912	0.166308	45	5
3	4	0.0472872	0.250211	0.208509	0.0834037	0.157624	0.204911	0.173386	0.208509	0.0625528	0.157624	46	2
3	4	0.0472872	0.250211	0.208509	0.0834037	0.157624	0.204911	0.173386	0.208509	0.0625528	0.157624	47	6
3	4	0.0428525	0.277538	0.231282	0.0925128	0.142842	0.185694	0.157126	0.231282	0.0693846	0.142842	48	6
3	4	0.0428525	0.277538	0.231282	0.0925128	0.142842	0.185694	0.157126	0.231282	0.0693846	0.142842	49	1
3	4	0.0409863	0.292712	0.243927	0.0975708	0.136621	0.177607	0.150283	0.243927	0.0731781	0.136621	50	4
3	4	0.0449468	0.263387	0.219489	0.0877957	0.149823	0.194769	0.164805	0.219489	0.0658467	0.149823	51	6
3	4	0.0409863	0.292712	0.243927	0.0975708	0.136621	0.177607	0.150283	0.243927	0.0731781	0.136621	52	1
3	4	0.0300176	0.152592	0.12716	0.0508638	0.100059	0.130076	0.110064	0.12716	0.0381479	0.100059	53	2
3	4	0.0472872	0.263387	0.219489	0.0877957	0.157624	0.204911	0.173386	0.219489	0.0658467	0.157624	54	3
3	4	0.0498923	0.250211	0.208509	0.0834037	0.166308	0.2162	0.182938	0.208509	0.0625528	0.166308	55	5
3	4	0.0472872	0.263387	0.219489	0.0877957	0.157624	0.204911	0.173386	0.219489	0.0658467	0.157624	56	2
3	4	0.0498923	0.250211	0.208509	0.0834037	0.166308	0.2162	0.182938	0.208509	0.0625528	0.166308	57	2
3	4	0.0428525	0.292712	0.243927	0.0975708	0.142842	0.185694	0.157126	0.243927	0.0731781	0.142842	58	6
3	4	0.0428525	0.292712	0.243927	0.0975708	0.142842	0.185694	0.157126	0.243927	0.0731781	0.142842	59	5
3	4	0.0409863	0.308957	0.257464	0.102986	0.136621	0.177607	0.150283	0.257464	0.0772392	0.136621	60	3
3	4	0.0472872	0.263387	0.219489	0.0877957	0.157624	0.204911	0.173386	0.219489	0.0658467	0.157624	61	5
3	4	0.0428525	0.292712	0.243927	0.0975708	0.142842	0.185694	0.157126	0.243927	0.0731781	0.142842	62	1
3	4	0.0300176	0.157325	0.131104	0.0524416	0.100059	0.130076	0.110064	0.131104	0.0393312	0.100059	63	4
3	4	0.0472872	0.277538	0.231282	0.0925128	0.157624	0.204911	0.173386	0.231282	0.0693846	0.157624	64	2
3	4	0.0498923	0.263387	0.219489	0.0877957	0.166308	0.2162	0.182938	0.219489	0.0658467	0.166308	65	1
3	4	0.0472872	0.277538	0.231282	0.0925128	0.157624	0.204911	0.173386	0.231282	0.0693846	0.157624	66	6
3	4	0.0498923	0.263387	0.219489	0.0877957	0.166308	0.2162	0.182938	0.219489	0.0658467	0.166308	67	2
3	4	0.0428525	0.308957	0.257464	0.102986	0.142842	0.185694	0.157126	0.257464	0.0772392	0.142842	68	5
3	4	0.0449468	0.292712	0.243927	0.0975708	0.149823	0.194769	0.164805	0.243927	0.0731781	0.149823	69	1
3	4	0.0428525	0.308957	0.257464	0.102986	0.142842	0.185694	0.157126	0.257464	0.0772392	0.142842	70	6
3	4	0.0472872	0.277538	0.231282	0.0925128	0.157624	0.204911	0.173386	0.231282	0.0693846	0.157624	71	5
3	4	0.0428525	0.308957	0.257464	0.102986	0.142842	0.185694	0.157126	0.257464	0.0772392	0.142842	72	6
3	4	0.03	0.12	0.1	0.04	0.1	0.13	0.11	0.1	0.03	0.1	73	2
3	4	0.0300176	0.162556	0.135463	0.0541853	0.100059	0.130076	0.110064	0.135463	0.040639	0.100059	74	1
3	4	0.0378705	0.121316	0.101097	0.0404387	0.126235	0.164106	0.138859	0.101097	0.030329	0.126235	75	3
3	4	0.0300675	0.152592	0.12716	0.0508638	0.100225	0.130293	0.110248	0.12716	0.0381479	0.100225	76	1
3	4	0.0354698	0.122333	0.101944	0.0407776	0.118233	0.153702	0.130056	0.101944	0.0305832	0.118233	77	2
3	4	0.0301152	0.148323	0.123603	0.0494411	0.100384	0.130499	0.110422	0.123603	0.0370808	0.100384	78	5
3	4	0.0336653	0.123849	0.103207	0.0412829	0.112218	0.145883	0.123439	0.103207	0.0309622	0.112218	79	3
3	4	0.0301845	0.144489	0.120407	0.0481629	0.100615	0.1308	0.110677	0.120407	0.0361222	0.100615	80	2
3	4	0.0329525	0.124837	0.104031	0.0416124	0.109842	0.142794	0.120826	0.104031	0.0312093	0.109842	81	2
3	4	0.0302813	0.141057	0.117548	0.0470192	0.100938	0.131219	0.111031	0.117548	0.0352644	0.100938	82	1
3	4	0.03	0.12	0.1	0.04	0.1	0.13	0.11	0.1	0.03	0.1	83	4
3	4	0.0300365	0.162556	0.135463	0.0541853	0.100122	0.130158	0.110134	0.135463	0.040639	0.100122	84	5
3	4	0.0378705	0.12177	0.101475	0.0405901	0.126235	0.164106	0.138859	0.101475	0.0304426	0.126235	85	1
3	4	0.0300675	0.157325	0.131104	0.0524416	0.100225	0.130293	0.110248	0.131104	0.0393312	0.100225	86	6
3	4	0.0354698	0.12302	0.102517	0.0410066	0.118233	0.153702	0.130056	0.102517	0.030755	0.118233	87	4
3	4	0.0301152	0.152592	0.12716	0.0508638	0.100384	0.130499	0.110422	0.12716	0.0381479	0.100384	88	2
3	4	0.0336653	0.124837	0.104031	0.0416124	0.112218	0.145883	0.123439	0.104031	0.0312093	0.112218	89	3
3	4	0.0301845	0.148323	0.123603	0.0494411	0.100615	0.1308	0.110677	0.123603	0.0370808	0.100615	90	6
3	4	0.0329525	0.126005	0.105004	0.0420017	0.109842	0.142794	0.120826	0.105004	0.0315013	0.109842	91	4
3	4	0.0304118	0.141057	0.117548	0.0470192	0.101373	0.131784	0.11151	0.117548	0.0352644	0.101373	92	2
3	4	0.03	0.120001	0.100001	0.0400002	0.1	0.13	0.11	0.100001	0.0300002	0.1	93	2
3	4	0.0300365	0.168318	0.140265	0.0561061	0.100122	0.130158	0.110134	0.140265	0.0420796	0.100122	94	4
3	4	0.0378705	0.122333	0.101944	0.0407776	0.126235	0.164106	0.138859	0.101944	0.0305832	0.126235	95	3
3	4	0.0300675	0.162556	0.135463	0.0541853	0.100225	0.130293	0.110248	0.135463	0.040639	0.100225	96	2
3	4	0.0354698	0.123849	0.103207	0.0412829	0.118233	0.153702	0.130056	0.103207	0.0309622	0.118233	97	6
3	4	0.0301152	0.157325	0.131104	0.0524416	0.100384	0.130499	0.110422	0.131104	0.0393312	0.100384	98	6
3	4	0.0336653	0.126005	0.105004	0.0420017	0.112218	0.145883	0.123439	0.105004	0.0315013	0.112218	99	1
3	4	0.0301845	0.152592	0.12716	0.0508638	0.100615	0.1308	0.110677	0.12716	0.0381479	0.100615	100	4
3	4	0.0336653	0.126005	0.105004	0.0420017	0.112218	0.145883	0.123439	0.105004	0.0315013	0.112218	101	3
3	4	0.0304118	0.144489	0.120407	0.0481629	0.101373	0.131784	0.11151	0.120407	0.0361222	0.101373	102	2
3	4	0.03	0.120004	0.100003	0.0400012	0.1	0.13	0.11	0.100003	0.0300009	0.1	103	5
3	4	0.0300365	0.174647	0.145539	0.0582157	0.100122	0.130158	0.110134	0.145539	0.0436618	0.100122	104	4
3	4	0.0378705	0.12302	0.102517	0.0410066	0.126235	0.164106	0.138859	0.102517	0.030755	0.126235	105	3
3	4	0.0300675	0.168318	0.140265	0.0561061	0.100225	0.130293	0.110248	0.140265	0.0420796	0.100225	106	2
3	4	0.0354698	0.124837	0.104031	0.0416124	0.118233	0.153702	0.130056	0.104031	0.0312093	0.118233	107	3
3	4	0.0301152	0.162556	0.135463	0.0541853	0.100384	0.130499	0.110422	0.135463	0.040639	0.100384	108	1
3	4	0.0336653	0.127373	0.106144	0.0424576	0.112218	0.145883	0.123439	0.106144	0.0318432	0.112218	109	6
3	4	0.0301845	0.157325	0.131104	0.0524416	0.100615	0.1308	0.110677	0.131104	0.0393312	0.100615	110	1
3	4	0.0336653	0.127373	0.106144	0.0424576	0.112218	0.145883	0.123439	0.106144	0.0318432	0.112218	111	5
3	4	0.0304118	0.148323	0.123603	0.0494411	0.101373	0.131784	0.11151	0.123603	0.0370808	0.101373	112	5
3	4	0.03	0.120012	0.10001	0.0400039	0.1	0.13	0.11	0.10001	0.0300029	0.1	113	1
3	4	0.0300675	0.174647	0.145539	0.0582157	0.100225	0.130293	0.110248	0.145539	0.0436618	0.100225	114	1
3	4	0.0378705	0.123849	0.103207	0.0412829	0.126235	0.164106	0.138859	0.103207	0.0309622	0.126235	115	3
3	4	0.0300675	0.174647	0.145539	0.0582157	0.100225	0.130293	0.110248	0.145539	0.0436618	0.100225	116	1
3	4	0.0354698	0.126005	0.105004	0.0420017	0.118233	0.153702	0.130056	0.105004	0.0315013	0.118233	117	2
3	4	0.0301845	0.162556	0.135463	0.0541853	0.100615	0.1308	0.110677	0.135463	0.040639	0.100615	118	6
3	4	0.0336653	0.128962	0.107468	0.0429872	0.112218	0.145883	0.123439	0.107468	0.0322404	0.112218	119	3
3	4	0.0302813	0.157325	0.131104	0.0524416	0.100938	0.131219	0.111031	0.131104	0.0393312	0.100938	120	2
3	4	0.0345	0.127373	0.106144	0.0424576	0.115	0.1495	0.1265	0.106144	0.0318432	0.115	121	6
3	4	0.0305832	0.148323	0.123603	0.0494411	0.101944	0.132527	0.112138	0.123603	0.0370808	0.101944	122	6
3	4	0.03	0.120029	0.100024	0.0400096	0.1	0.13	0.11	0.100024	0.0300072	0.1	123	1
3	4	0.0301152	0.174647	0.145539	0.0582157	0.100384	0.130499	0.110422	0.145539	0.0436618	0.100384	124	1
3	4	0.0378705	0.124837	0.104031	0.0416124	0.126235	0.164106	0.138859	0.104031	0.0312093	0.126235	125	4
3	4	0.0301152	0.174647	0.145539	0.0582157	0.100384	0.130499	0.110422	0.145539	0.0436618	0.100384	126	4
3	4	0.0354698	0.127373	0.106144	0.0424576	0.118233	0.153702	0.130056	0.106144	0.0318432	0.118233	127	1
3	4	0.0302813	0.162556	0.135463	0.0541853	0.100938	0.131219	0.111031	0.135463	0.040639	0.100938	128	1
3	4	0.0336653	0.130795	0.108995	0.0435982	0.112218	0.145883	0.123439	0.108995	0.0326986	0.112218	129	3
3	4	0.0302813	0.162556	0.135463	0.0541853	0.100938	0.131219	0.111031	0.135463	0.040639	0.100938	130	1
3	4	0.0345	0.128962	0.107468	0.0429872	0.115	0.1495	0.1265	0.107468	0.0322404	0.115	131	5
3	4	0.0308033	0.148323	0.123603	0.0494411	0.102678	0.133481	0.112945	0.123603	0.0370808	0.102678	132	2
3	4	0.03	0.120029	0.100024	0.0400096	0.1	0.13	0.11	0.100024	0.0300072	0.1	133	2
3	4	0.0301845	0.174647	0.145539	0.0582157	0.100615	0.1308	0.110677	0.145539	0.0436618	0.100615	134	3
3	4	0.0393312	0.124837	0.104031	0.0416124	0.131104	0.170435	0.144214	0.104031	0.0312093	0.131104	135	4
3	4	0.0301845	0.174647	0.145539	0.0582157	0.100615	0.1308	0.110677	0.145539	0.0436618	0.100615	136	5
3	4	0.0354698	0.128962	0.107468	0.0429872	0.118233	0.153702	0.130056	0.107468	0.0322404	0.118233	137	1
3	4	0.0304118	0.162556	0.135463	0.0541853	0.101373	0.131784	0.11151	0.135463	0.040639	0.101373	138	2
3	4	0.0336653	0.132895	0.110746	0.0442984	0.112218	0.145883	0.123439	0.110746	0.0332238	0.112218	139	2
3	4	0.0304118	0.162556	0.135463	0.0541853	0.101373	0.131784	0.11151	0.135463	0.040639	0.101373	140	4
3	4	0.0345	0.130795	0.108995	0.0435982	0.115	0.1495	0.1265	0.108995	0.0326986	0.115	141	6
3	4	0.0308033	0.152592	0.12716	0.0508638	0.102678	0.133481	0.112945	0.12716	0.0381479	0.102678	142	1
3	4	0.03	0.12006	0.10005	0.0400199	0.1	0.13	0.11	0.10005	0.0300149	0.1	143	4
3	4	0.0301845	0.181578	0.151315	0.0605261	0.100615	0.1308	0.110677	0.151315	0.0453946	0.100615	144	5
3	4	0.0393312	0.126005	0.105004	0.0420017	0.131104	0.170435	0.144214	0.105004	0.0315013	0.131104	145	3
3	4	0.0302813	0.174647	0.145539	0.0582157	0.100938	0.131219	0.111031	0.145539	0.0436618	0.100938	146	1
3	4	0.0354698	0.130795	0.108995	0.0435982	0.118233	0.153702	0.130056	0.108995	0.0326986	0.118233	147	4
3	4	0.0304118	0.168318	0.140265	0.0561061	0.101373	0.131784	0.11151	0.140265	0.0420796	0.101373	148	1
3	4	0.0336653	0.135288	0.11274	0.0450961	0.112218	0.145883	0.123439	0.11274	0.0338221	0.112218	149	4
3	4	0.0304118	0.168318	0.140265	0.0561061	0.101373	0.131784	0.11151	0.140265	0.0420796	0.101373	150	2
3	4	0.0354698	0.130795	0.108995	0.0435982	0.118233	0.153702	0.130056	0.108995	0.0326986	0.118233	151	4
3	4	0.0310805	0.152592	0.12716	0.0508638	0.103602	0.134682	0.113962	0.12716	0.0381479	0.103602	152	5
3	4	0.03	0.120111	0.100092	0.0400369	0.1	0.13	0.11	0.100092	0.0300277	0.1	153	6
3	4	0.0302813	0.181578	0.151315	0.0605261	0.100938	0.131219	0.111031	0.151315	0.0453946	0.100938	154	4
3	4	0.0393312	0.127373	0.106144	0.0424576	0.131104	0.170435	0.144214	0.106144	0.0318432	0.131104	155	4
3	4	0.0304118	0.174647	0.145539	0.0582157	0.101373	0.131784	0.11151	0.145539	0.0436618	0.101373	156	5
3	4	0.0365885	0.130795	0.108995	0.0435982	0.121962	0.15855	0.134158	0.108995	0.0326986	0.121962	157	3
3	4	0.0305832	0.168318	0.140265	0.0561061	0.101944	0.132527	0.112138	0.140265	0.0420796	0.101944	158	2
3	4	0.0336653	0.138	0.115	0.046	0.112218	0.145883	0.123439	0.115	0.0345	0.112218	159	4
3	4	0.0304118	0.174647	0.145539	0.0582157	0.101373	0.131784	0.11151	0.145539	0.0436618	0.101373	160	6
3	4	0.0354698	0.132895	0.110746	0.0442984	0.118233	0.153702	0.130056	0.110746	0.0332238	0.118233	161	2
3	4	0.0310805	0.157325	0.131104	0.0524416	0.103602	0.134682	0.113962	0.131104	0.0393312	0.103602	162	1
3	4	0.03	0.120189	0.100157	0.0400629	0.1	0.13	0.11	0.100157	0.0300472	0.1	163	5
3	4	0.0304118	0.181578	0.151315	0.0605261	0.101373	0.131784	0.11151	0.151315	0.0453946	0.101373	164	2
3	4	0.0393312	0.128962	0.107468	0.0429872	0.131104	0.170435	0.144214	0.107468	0.0322404	0.131104	165	3
3	4	0.0304118	0.181578	0.151315	0.0605261	0.101373	0.131784	0.11151	0.151315	0.0453946	0.101373	166	1
3	4	0.0365885	0.132895	0.110746	0.0442984	0.121962	0.15855	0.134158	0.110746	0.0332238	0.121962	167	3
3	4	0.0305832	0.174647	0.145539	0.0582157	0.101944	0.132527	0.112138	0.145539	0.0436618	0.101944	168	2
3	4	0.0336653	0.141057	0.117548	0.0470192	0.112218	0.145883	0.123439	0.117548	0.0352644	0.112218	169	5
3	4	0.0304118	0.181578	0.151315	0.0605261	0.101373	0.131784	0.11151	0.151315	0.0453946	0.101373	170	3
3	4	0.0354698	0.135288	0.11274	0.0450961	0.118233	0.153702	0.130056	0.11274	0.0338221	0.118233	171	4
3	4	0.0314238	0.157325	0.131104	0.0524416	0.104746	0.13617	0.115221	0.131104	0.0393312	0.104746	172	2
3	4	0.03	0.120302	0.100252	0.0401008	0.1	0.13	0.11	0.100252	0.0300756	0.1	173	5
3	4	0.0304118	0.189149	0.157624	0.0630496	0.101373	0.131784	0.11151	0.157624	0.0472872	0.101373	174	6
3	4	0.0393312	0.130795	0.108995	0.0435982	0.131104	0.170435	0.144214	0.108995	0.0326986	0.131104	175	1
3	4	0.0305832	0.181578	0.151315	0.0605261	0.101944	0.132527	0.112138	0.151315	0.0453946	0.101944	176	1
3	4	0.0365885	0.135288	0.11274	0.0450961	0.121962	0.15855	0.134158	0.11274	0.0338221	0.121962	177	5
3	4	0.0305832	0.181578	0.151315	0.0605261	0.101944	0.132527	0.112138	0.151315	0.0453946	0.101944	178	5
3	4	0.0336653	0.144489	0.120407	0.0481629	0.112218	0.145883	0.123439	0.120407	0.0361222	0.112218	179	5
3	4	0.0305832	0.181578	0.151315	0.0605261	0.101944	0.132527	0.112138	0.151315	0.0453946	0.101944	180	4
3	4	0.0354698	0.138	0.115	0.046	0.118233	0.153702	0.130056	0.115	0.0345	0.118233	181	6
3	4	0.0314238	0.162556	0.135463	0.0541853	0.104746	0.13617	0.115221	0.135463	0.040639	0.104746	182	4
3	4	0.03	0.120461	0.100384	0.0401536	0.1	0.13	0.11	0.100384	0.0301152	0.1	183	5
3	4	0.0305832	0.189149	0.157624	0.0630496	0.101944	0.132527	0.112138	0.157624	0.0472872	0.101944	184	1
3	4	0.0409863	0.130795	0.108995	0.0435982	0.136621	0.177607	0.150283	0.108995	0.0326986	0.136621	185	2
3	4	0.0308033	0.181578	0.151315	0.0605261	0.102678	0.133481	0.112945	0.151315	0.0453946	0.102678	186	1
3	4	0.0365885	0.138	0.115	0.046	0.121962	0.15855	0.134158	0.115	0.0345	0.121962	187	5
3	4	0.0308033	0.181578	0.151315	0.0605261	0.102678	0.133481	0.112945	0.151315	0.0453946	0.102678	188	6
3	4	0.0336653	0.148323	0.123603	0.0494411	0.112218	0.145883	0.123439	0.123603	0.0370808	0.112218	189	2
3	4	0.0308033	0.181578	0.151315	0.0605261	0.102678	0.133481	0.112945	0.151315	0.0453946	0.102678	190	5
3	4	0.0354698	0.141057	0.117548	0.0470192	0.118233	0.153702	0.130056	0.117548	0.0352644	0.118233	191	5
3	4	0.0314238	0.168318	0.140265	0.0561061	0.104746	0.13617	0.115221	0.140265	0.0420796	0.104746	192	3
3	4	0.03	0.120675	0.100562	0.0402249	0.1	0.13	0.11	0.100562	0.0301687	0.1	193	2
3	4	0.0308033	0.189149	0.157624	0.0630496	0.102678	0.133481	0.112945	0.157624	0.0472872	0.102678	194	6
3	4	0.0409863	0.132895	0.110746	0.0442984	0.136621	0.177607	0.150283	0.110746	0.0332238	0.136621	195	5
3	4	0.0310805	0.181578	0.151315	0.0605261	0.103602	0.134682	0.113962	0.151315	0.0453946	0.103602	196	1
3	4	0.0365885	0.141057	0.117548	0.0470192	0.121962	0.15855	0.134158	0.117548	0.0352644	0.121962	197	4
3	4	0.0308033	0.189149	0.157624	0.0630496	0.102678	0.133481	0.112945	0.157624	0.0472872	0.102678	198	3
3	4	0.0336653	0.152592	0.12716	0.0508638	0.112218	0.145883	0.123439	0.12716	0.0381479	0.112218	199	5
3	4	0.0310805	0.181578	0.151315	0.0605261	0.103602	0.134682	0.113962	0.151315	0.0453946	0.103602	200	1
3	4	0.0354698	0.144489	0.120407	0.0481629	0.118233	0.153702	0.130056	0.120407	0.0361222	0.118233	201	6
3	4	0.0314238	0.174647	0.145539	0.0582157	0.104746	0.13617	0.115221	0.145539	0.0436618	0.104746	202	2
3	4	0.03	0.120956	0.100796	0.0403185	0.1	0.13	0.11	0.100796	0.0302389	0.1	203	6
3	4	0.0310805	0.189149	0.157624	0.0630496	0.103602	0.134682	0.113962	0.157624	0.0472872	0.103602	204	6
3	4	0.0409863	0.135288	0.11274	0.0450961	0.136621	0.177607	0.150283	0.11274	0.0338221	0.136621	205	2
3	4	0.0314238	0.181578	0.151315	0.0605261	0.104746	0.13617	0.115221	0.151315	0.0453946	0.104746	206	3
3	4	0.0365885	0.144489	0.120407	0.0481629	0.121962	0.15855	0.134158	0.120407	0.0361222	0.121962	207	3
3	4	0.0310805	0.189149	0.157624	0.0630496	0.103602	0.134682	0.113962	0.157624	0.0472872	0.103602	208	1
3	4	0.0336653	0.157325	0.131104	0.0524416	0.112218	0.145883	0.123439	0.131104	0.0393312	0.112218	209	6
3	4	0.0314238	0.181578	0.151315	0.0605261	0.104746	0.13617	0.115221	0.151315	0.0453946	0.104746	210	2
3	4	0.0354698	0.148323	0.123603	0.0494411	0.118233	0.153702	0.130056	0.123603	0.0370808	0.118233	211	4
3	4	0.0314238	0.181578	0.151315	0.0605261	0.104746	0.13617	0.115221	0.151315	0.0453946	0.104746	212	6
3	4	0.03	0.121316	0.101097	0.0404387	0.1	0.13	0.11	0.101097	0.030329	0.1	213	3
3	4	0.0310805	0.197397	0.164497	0.0657989	0.103602	0.134682	0.113962	0.164497	0.0493492	0.103602	214	1
3	4	0.0409863	0.138	0.115	0.046	0.136621	0.177607	0.150283	0.115	0.0345	0.136621	215	3
3	4	0.0318432	0.181578	0.151315	0.0605261	0.106144	0.137987	0.116758	0.151315	0.0453946	0.106144	216	4
3	5	0.0365885	0.148323	0.123603	0.0494411	0.121962	0.15855	0.134158	0.123603	0.0370808	0.121962	1	2
3	5	0.0314238	0.189149	0.157624	0.0630496	0.104746	0.13617	0.115221	0.157624	0.0472872	0.104746	2	1
3	5	0.0336653	0.162556	0.135463	0.0541853	0.112218	0.145883	0.123439	0.135463	0.040639	0.112218	3	6
3	5	0.0314238	0.189149	0.157624	0.0630496	0.104746	0.13617	0.115221	0.157624	0.0472872	0.104746	4	1
3	5	0.0354698	0.152592	0.12716	0.0508638	0.118233	0.153702	0.130056	0.12716	0.0381479	0.118233	5	5
3	5	0.0314238	0.189149	0.157624	0.0630496	0.104746	0.13617	0.115221	0.157624	0.0472872	0.104746	6	1
3	5	0.03	0.12177	0.101475	0.0405901	0.1	0.13	0.11	0.101475	0.0304426	0.1	7	3
3	5	0.0314238	0.197397	0.164497	0.0657989	0.104746	0.13617	0.115221	0.164497	0.0493492	0.104746	8	5
3	5	0.0428525	0.138	0.115	0.046	0.142842	0.185694	0.157126	0.115	0.0345	0.142842	9	6
3	5	0.032349	0.181578	0.151315	0.0605261	0.10783	0.140179	0.118613	0.151315	0.0453946	0.10783	10	1
3	5	0.0365885	0.152592	0.12716	0.0508638	0.121962	0.15855	0.134158	0.12716	0.0381479	0.121962	11	1
3	5	0.0318432	0.189149	0.157624	0.0630496	0.106144	0.137987	0.116758	0.157624	0.0472872	0.106144	12	6
3	5	0.0345	0.162556	0.135463	0.0541853	0.115	0.1495	0.1265	0.135463	0.040639	0.115	13	6
3	5	0.0318432	0.189149	0.157624	0.0630496	0.106144	0.137987	0.116758	0.157624	0.0472872	0.106144	14	1
3	5	0.0365885	0.152592	0.12716	0.0508638	0.121962	0.15855	0.134158	0.12716	0.0381479	0.121962	15	1
3	5	0.0318432	0.189149	0.157624	0.0630496	0.106144	0.137987	0.116758	0.157624	0.0472872	0.106144	16	5
3	5	0.0300005	0.12177	0.101475	0.0405901	0.100002	0.130002	0.110002	0.101475	0.0304426	0.100002	17	2
3	5	0.0318432	0.197397	0.164497	0.0657989	0.106144	0.137987	0.116758	0.164497	0.0493492	0.106144	18	6
3	5	0.0428525	0.141057	0.117548	0.0470192	0.142842	0.185694	0.157126	0.117548	0.0352644	0.142842	19	2
3	5	0.0329525	0.181578	0.151315	0.0605261	0.109842	0.142794	0.120826	0.151315	0.0453946	0.109842	20	6
3	5	0.0378705	0.152592	0.12716	0.0508638	0.126235	0.164106	0.138859	0.12716	0.0381479	0.126235	21	5
3	5	0.032349	0.189149	0.157624	0.0630496	0.10783	0.140179	0.118613	0.157624	0.0472872	0.10783	22	2
3	5	0.0354698	0.162556	0.135463	0.0541853	0.118233	0.153702	0.130056	0.135463	0.040639	0.118233	23	6
3	5	0.032349	0.189149	0.157624	0.0630496	0.10783	0.140179	0.118613	0.157624	0.0472872	0.10783	24	2
3	5	0.0378705	0.152592	0.12716	0.0508638	0.126235	0.164106	0.138859	0.12716	0.0381479	0.126235	25	6
3	5	0.032349	0.189149	0.157624	0.0630496	0.10783	0.140179	0.118613	0.157624	0.0472872	0.10783	26	5
3	5	0.0300005	0.122333	0.101944	0.0407776	0.100002	0.130002	0.110002	0.101944	0.0305832	0.100002	27	6
3	5	0.0318432	0.206361	0.171968	0.0687871	0.106144	0.137987	0.116758	0.171968	0.0515903	0.106144	28	2
3	5	0.0428525	0.144489	0.120407	0.0481629	0.142842	0.185694	0.157126	0.120407	0.0361222	0.142842	29	2
3	5	0.0329525	0.189149	0.157624	0.0630496	0.109842	0.142794	0.120826	0.157624	0.0472872	0.109842	30	1
3	5	0.0378705	0.157325	0.131104	0.0524416	0.126235	0.164106	0.138859	0.131104	0.0393312	0.126235	31	3
3	5	0.032349	0.197397	0.164497	0.0657989	0.10783	0.140179	0.118613	0.164497	0.0493492	0.10783	32	2
3	5	0.0354698	0.168318	0.140265	0.0561061	0.118233	0.153702	0.130056	0.140265	0.0420796	0.118233	33	3
3	5	0.032349	0.197397	0.164497	0.0657989	0.10783	0.140179	0.118613	0.164497	0.0493492	0.10783	34	1
3	5	0.0378705	0.157325	0.131104	0.0524416	0.126235	0.164106	0.138859	0.131104	0.0393312	0.126235	35	2
3	5	0.032349	0.197397	0.164497	0.0657989	0.10783	0.140179	0.118613	0.164497	0.0493492	0.10783	36	3
3	5	0.0300005	0.12302	0.102517	0.0410066	0.100002	0.130002	0.110002	0.102517	0.030755	0.100002	37	4
3	5	0.0318432	0.216083	0.180069	0.0720277	0.106144	0.137987	0.116758	0.180069	0.0540208	0.106144	38	1
3	5	0.0428525	0.148323	0.123603	0.0494411	0.142842	0.185694	0.157126	0.123603	0.0370808	0.142842	39	4
3	5	0.0336653	0.189149	0.157624	0.0630496	0.112218	0.145883	0.123439	0.157624	0.0472872	0.112218	40	2
3	5	0.0378705	0.162556	0.135463	0.0541853	0.126235	0.164106	0.138859	0.135463	0.040639	0.126235	41	2
3	5	0.032349	0.206361	0.171968	0.0687871	0.10783	0.140179	0.118613	0.171968	0.0515903	0.10783	42	6
3	5	0.0354698	0.174647	0.145539	0.0582157	0.118233	0.153702	0.130056	0.145539	0.0436618	0.118233	43	4
3	5	0.032349	0.206361	0.171968	0.0687871	0.10783	0.140179	0.118613	0.171968	0.0515903	0.10783	44	6
3	5	0.0378705	0.162556	0.135463	0.0541853	0.126235	0.164106	0.138859	0.135463	0.040639	0.126235	45	6
3	5	0.032349	0.206361	0.171968	0.0687871	0.10783	0.140179	0.118613	0.171968	0.0515903	0.10783	46	5
3	5	0.0300005	0.123849	0.103207	0.0412829	0.100002	0.130002	0.110002	0.103207	0.0309622	0.100002	47	2
3	5	0.032349	0.216083	0.180069	0.0720277	0.10783	0.140179	0.118613	0.180069	0.0540208	0.10783	48	1
3	5	0.0449468	0.148323	0.123603	0.0494411	0.149823	0.194769	0.164805	0.123603	0.0370808	0.149823	49	1
3	5	0.0336653	0.197397	0.164497	0.0657989	0.112218	0.145883	0.123439	0.164497	0.0493492	0.112218	50	1
3	5	0.0378705	0.168318	0.140265	0.0561061	0.126235	0.164106	0.138859	0.140265	0.0420796	0.126235	51	6
3	5	0.0329525	0.206361	0.171968	0.0687871	0.109842	0.142794	0.120826	0.171968	0.0515903	0.109842	52	3
3	5	0.0354698	0.181578	0.151315	0.0605261	0.118233	0.153702	0.130056	0.151315	0.0453946	0.118233	53	5
3	5	0.0329525	0.206361	0.171968	0.0687871	0.109842	0.142794	0.120826	0.171968	0.0515903	0.109842	54	6
3	5	0.0393312	0.162556	0.135463	0.0541853	0.131104	0.170435	0.144214	0.135463	0.040639	0.131104	55	2
3	5	0.0329525	0.206361	0.171968	0.0687871	0.109842	0.142794	0.120826	0.171968	0.0515903	0.109842	56	5
3	5	0.0300005	0.124837	0.104031	0.0416124	0.100002	0.130002	0.110002	0.104031	0.0312093	0.100002	57	6
3	5	0.0329525	0.216083	0.180069	0.0720277	0.109842	0.142794	0.120826	0.180069	0.0540208	0.109842	58	2
3	5	0.0449468	0.152592	0.12716	0.0508638	0.149823	0.194769	0.164805	0.12716	0.0381479	0.149823	59	2
3	5	0.0345	0.197397	0.164497	0.0657989	0.115	0.1495	0.1265	0.164497	0.0493492	0.115	60	6
3	5	0.0393312	0.168318	0.140265	0.0561061	0.131104	0.170435	0.144214	0.140265	0.0420796	0.131104	61	5
3	5	0.0336653	0.206361	0.171968	0.0687871	0.112218	0.145883	0.123439	0.171968	0.0515903	0.112218	62	3
3	5	0.0354698	0.189149	0.157624	0.0630496	0.118233	0.153702	0.130056	0.157624	0.0472872	0.118233	63	2
3	5	0.0336653	0.206361	0.171968	0.0687871	0.112218	0.145883	0.123439	0.171968	0.0515903	0.112218	64	4
3	5	0.0393312	0.168318	0.140265	0.0561061	0.131104	0.170435	0.144214	0.140265	0.0420796	0.131104	65	1
3	5	0.0329525	0.216083	0.180069	0.0720277	0.109842	0.142794	0.120826	0.180069	0.0540208	0.109842	66	5
3	5	0.0300005	0.126005	0.105004	0.0420017	0.100002	0.130002	0.110002	0.105004	0.0315013	0.100002	67	1
3	5	0.0329525	0.226603	0.188836	0.0755345	0.109842	0.142794	0.120826	0.188836	0.0566508	0.109842	68	1
3	5	0.0449468	0.157325	0.131104	0.0524416	0.149823	0.194769	0.164805	0.131104	0.0393312	0.149823	69	2
3	5	0.0345	0.206361	0.171968	0.0687871	0.115	0.1495	0.1265	0.171968	0.0515903	0.115	70	2
3	5	0.0409863	0.168318	0.140265	0.0561061	0.136621	0.177607	0.150283	0.140265	0.0420796	0.136621	71	4
3	5	0.0336653	0.216083	0.180069	0.0720277	0.112218	0.145883	0.123439	0.180069	0.0540208	0.112218	72	3
3	5	0.0365885	0.189149	0.157624	0.0630496	0.121962	0.15855	0.134158	0.157624	0.0472872	0.121962	73	3
3	5	0.0336653	0.216083	0.180069	0.0720277	0.112218	0.145883	0.123439	0.180069	0.0540208	0.112218	74	2
3	5	0.0393312	0.174647	0.145539	0.0582157	0.131104	0.170435	0.144214	0.145539	0.0436618	0.131104	75	1
3	5	0.0329525	0.226603	0.188836	0.0755345	0.109842	0.142794	0.120826	0.188836	0.0566508	0.109842	76	4
3	5	0.0300005	0.127373	0.106144	0.0424576	0.100002	0.130002	0.110002	0.106144	0.0318432	0.100002	77	1
3	5	0.0336653	0.226603	0.188836	0.0755345	0.112218	0.145883	0.123439	0.188836	0.0566508	0.112218	78	1
3	5	0.0449468	0.162556	0.135463	0.0541853	0.149823	0.194769	0.164805	0.135463	0.040639	0.149823	79	5
3	5	0.0354698	0.206361	0.171968	0.0687871	0.118233	0.153702	0.130056	0.171968	0.0515903	0.118233	80	5
3	5	0.0409863	0.174647	0.145539	0.0582157	0.136621	0.177607	0.150283	0.145539	0.0436618	0.136621	81	1
3	5	0.0345	0.216083	0.180069	0.0720277	0.115	0.1495	0.1265	0.180069	0.0540208	0.115	82	6
3	5	0.0365885	0.197397	0.164497	0.0657989	0.121962	0.15855	0.134158	0.164497	0.0493492	0.121962	83	1
3	5	0.0336653	0.226603	0.188836	0.0755345	0.112218	0.145883	0.123439	0.188836	0.0566508	0.112218	84	3
3	5	0.0393312	0.181578	0.151315	0.0605261	0.131104	0.170435	0.144214	0.151315	0.0453946	0.131104	85	4
3	5	0.0336653	0.226603	0.188836	0.0755345	0.112218	0.145883	0.123439	0.188836	0.0566508	0.112218	86	1
3	5	0.0300023	0.127373	0.106144	0.0424576	0.100008	0.13001	0.110008	0.106144	0.0318432	0.100008	87	4
3	5	0.0345	0.226603	0.188836	0.0755345	0.115	0.1495	0.1265	0.188836	0.0566508	0.115	88	1
3	5	0.0472872	0.162556	0.135463	0.0541853	0.157624	0.204911	0.173386	0.135463	0.040639	0.157624	89	5
3	5	0.0365885	0.206361	0.171968	0.0687871	0.121962	0.15855	0.134158	0.171968	0.0515903	0.121962	90	4
3	5	0.0428525	0.174647	0.145539	0.0582157	0.142842	0.185694	0.157126	0.145539	0.0436618	0.142842	91	2
3	5	0.0354698	0.216083	0.180069	0.0720277	0.118233	0.153702	0.130056	0.180069	0.0540208	0.118233	92	5
3	5	0.0378705	0.197397	0.164497	0.0657989	0.126235	0.164106	0.138859	0.164497	0.0493492	0.126235	93	3
3	5	0.0345	0.226603	0.188836	0.0755345	0.115	0.1495	0.1265	0.188836	0.0566508	0.115	94	2
3	5	0.0409863	0.181578	0.151315	0.0605261	0.136621	0.177607	0.150283	0.151315	0.0453946	0.136621	95	1
3	5	0.0345	0.226603	0.188836	0.0755345	0.115	0.1495	0.1265	0.188836	0.0566508	0.115	96	4
3	5	0.0300023	0.128962	0.107468	0.0429872	0.100008	0.13001	0.110008	0.107468	0.0322404	0.100008	97	4
3	5	0.0354698	0.226603	0.188836	0.0755345	0.118233	0.153702	0.130056	0.188836	0.0566508	0.118233	98	1
3	5	0.0472872	0.168318	0.140265	0.0561061	0.157624	0.204911	0.173386	0.140265	0.0420796	0.157624	99	2
3	5	0.0378705	0.206361	0.171968	0.0687871	0.126235	0.164106	0.138859	0.171968	0.0515903	0.126235	100	5
3	5	0.0428525	0.181578	0.151315	0.0605261	0.142842	0.185694	0.157126	0.151315	0.0453946	0.142842	101	2
3	5	0.0365885	0.216083	0.180069	0.0720277	0.121962	0.15855	0.134158	0.180069	0.0540208	0.121962	102	6
3	5	0.0393312	0.197397	0.164497	0.0657989	0.131104	0.170435	0.144214	0.164497	0.0493492	0.131104	103	5
3	5	0.0345	0.237965	0.198304	0.0793216	0.115	0.1495	0.1265	0.198304	0.0594912	0.115	104	1
3	5	0.0428525	0.181578	0.151315	0.0605261	0.142842	0.185694	0.157126	0.151315	0.0453946	0.142842	105	2
3	5	0.0345	0.237965	0.198304	0.0793216	0.115	0.1495	0.1265	0.198304	0.0594912	0.115	106	5
3	5	0.0300023	0.130795	0.108995	0.0435982	0.100008	0.13001	0.110008	0.108995	0.0326986	0.100008	107	5
3	5	0.0365885	0.226603	0.188836	0.0755345	0.121962	0.15855	0.134158	0.188836	0.0566508	0.121962	108	5
3	5	0.0472872	0.174647	0.145539	0.0582157	0.157624	0.204911	0.173386	0.145539	0.0436618	0.157624	109	3
3	5	0.0378705	0.216083	0.180069	0.0720277	0.126235	0.164106	0.138859	0.180069	0.0540208	0.126235	110	2
3	5	0.0428525	0.189149	0.157624	0.0630496	0.142842	0.185694	0.157126	0.157624	0.0472872	0.142842	111	1
3	5	0.0365885	0.226603	0.188836	0.0755345	0.121962	0.15855	0.134158	0.188836	0.0566508	0.121962	112	6
3	5	0.0393312	0.206361	0.171968	0.0687871	0.131104	0.170435	0.144214	0.171968	0.0515903	0.131104	113	5
3	5	0.0345	0.250211	0.208509	0.0834037	0.115	0.1495	0.1265	0.208509	0.0625528	0.115	114	1
3	5	0.0428525	0.189149	0.157624	0.0630496	0.142842	0.185694	0.157126	0.157624	0.0472872	0.142842	115	2
3	5	0.0354698	0.237965	0.198304	0.0793216	0.118233	0.153702	0.130056	0.198304	0.0594912	0.118233	116	6
3	5	0.0300023	0.132895	0.110746	0.0442984	0.100008	0.13001	0.110008	0.110746	0.0332238	0.100008	117	6
3	5	0.0378705	0.226603	0.188836	0.0755345	0.126235	0.164106	0.138859	0.188836	0.0566508	0.126235	118	4
3	5	0.0472872	0.181578	0.151315	0.0605261	0.157624	0.204911	0.173386	0.151315	0.0453946	0.157624	119	3
3	5	0.0378705	0.226603	0.188836	0.0755345	0.126235	0.164106	0.138859	0.188836	0.0566508	0.126235	120	1
3	5	0.0428525	0.197397	0.164497	0.0657989	0.142842	0.185694	0.157126	0.164497	0.0493492	0.142842	121	5
3	5	0.0365885	0.237965	0.198304	0.0793216	0.121962	0.15855	0.134158	0.198304	0.0594912	0.121962	122	1
3	5	0.0393312	0.216083	0.180069	0.0720277	0.131104	0.170435	0.144214	0.180069	0.0540208	0.131104	123	5
3	5	0.0354698	0.250211	0.208509	0.0834037	0.118233	0.153702	0.130056	0.208509	0.0625528	0.118233	124	2
3	5	0.0428525	0.197397	0.164497	0.0657989	0.142842	0.185694	0.157126	0.164497	0.0493492	0.142842	125	3
3	5	0.0365885	0.237965	0.198304	0.0793216	0.121962	0.15855	0.134158	0.198304	0.0594912	0.121962	126	6
3	5	0.0300023	0.135288	0.11274	0.0450961	0.100008	0.13001	0.110008	0.11274	0.0338221	0.100008	127	6
3	5	0.0393312	0.226603	0.188836	0.0755345	0.131104	0.170435	0.144214	0.188836	0.0566508	0.131104	128	3
3	5	0.0472872	0.189149	0.157624	0.0630496	0.157624	0.204911	0.173386	0.157624	0.0472872	0.157624	129	5
3	5	0.0393312	0.226603	0.188836	0.0755345	0.131104	0.170435	0.144214	0.188836	0.0566508	0.131104	130	5
3	5	0.0428525	0.206361	0.171968	0.0687871	0.142842	0.185694	0.157126	0.171968	0.0515903	0.142842	131	1
3	5	0.0378705	0.237965	0.198304	0.0793216	0.126235	0.164106	0.138859	0.198304	0.0594912	0.126235	132	5
3	5	0.0393312	0.226603	0.188836	0.0755345	0.131104	0.170435	0.144214	0.188836	0.0566508	0.131104	133	5
3	5	0.0354698	0.263387	0.219489	0.0877957	0.118233	0.153702	0.130056	0.219489	0.0658467	0.118233	134	3
3	5	0.0428525	0.206361	0.171968	0.0687871	0.142842	0.185694	0.157126	0.171968	0.0515903	0.142842	135	6
3	5	0.0378705	0.237965	0.198304	0.0793216	0.126235	0.164106	0.138859	0.198304	0.0594912	0.126235	136	3
3	5	0.0300023	0.138	0.115	0.046	0.100008	0.13001	0.110008	0.115	0.0345	0.100008	137	1
3	5	0.0409863	0.226603	0.188836	0.0755345	0.136621	0.177607	0.150283	0.188836	0.0566508	0.136621	138	3
3	5	0.0472872	0.197397	0.164497	0.0657989	0.157624	0.204911	0.173386	0.164497	0.0493492	0.157624	139	1
3	5	0.0393312	0.237965	0.198304	0.0793216	0.131104	0.170435	0.144214	0.198304	0.0594912	0.131104	140	3
3	5	0.0449468	0.206361	0.171968	0.0687871	0.149823	0.194769	0.164805	0.171968	0.0515903	0.149823	141	2
3	5	0.0378705	0.250211	0.208509	0.0834037	0.126235	0.164106	0.138859	0.208509	0.0625528	0.126235	142	6
3	5	0.0393312	0.237965	0.198304	0.0793216	0.131104	0.170435	0.144214	0.198304	0.0594912	0.131104	143	5
3	5	0.0365885	0.263387	0.219489	0.0877957	0.121962	0.15855	0.134158	0.219489	0.0658467	0.121962	144	1
3	5	0.0428525	0.216083	0.180069	0.0720277	0.142842	0.185694	0.157126	0.180069	0.0540208	0.142842	145	5
3	5	0.0393312	0.237965	0.198304	0.0793216	0.131104	0.170435	0.144214	0.198304	0.0594912	0.131104	146	4
3	5	0.0300072	0.138	0.115	0.046	0.100024	0.130031	0.110026	0.115	0.0345	0.100024	147	2
3	5	0.0409863	0.237965	0.198304	0.0793216	0.136621	0.177607	0.150283	0.198304	0.0594912	0.136621	148	4
3	5	0.0498923	0.197397	0.164497	0.0657989	0.166308	0.2162	0.182938	0.164497	0.0493492	0.166308	149	4
3	5	0.0409863	0.237965	0.198304	0.0793216	0.136621	0.177607	0.150283	0.198304	0.0594912	0.136621	150	4
3	5	0.0449468	0.216083	0.180069	0.0720277	0.149823	0.194769	0.164805	0.180069	0.0540208	0.149823	151	1
3	5	0.0378705	0.263387	0.219489	0.0877957	0.126235	0.164106	0.138859	0.219489	0.0658467	0.126235	152	4
3	5	0.0409863	0.237965	0.198304	0.0793216	0.136621	0.177607	0.150283	0.198304	0.0594912	0.136621	153	1
3	5	0.0378705	0.263387	0.219489	0.0877957	0.126235	0.164106	0.138859	0.219489	0.0658467	0.126235	154	2
3	5	0.0449468	0.216083	0.180069	0.0720277	0.149823	0.194769	0.164805	0.180069	0.0540208	0.149823	155	6
3	5	0.0393312	0.250211	0.208509	0.0834037	0.131104	0.170435	0.144214	0.208509	0.0625528	0.131104	156	5
3	5	0.0300072	0.141057	0.117548	0.0470192	0.100024	0.130031	0.110026	0.117548	0.0352644	0.100024	157	2
3	5	0.0409863	0.250211	0.208509	0.0834037	0.136621	0.177607	0.150283	0.208509	0.0625528	0.136621	158	4
3	5	0.0498923	0.206361	0.171968	0.0687871	0.166308	0.2162	0.182938	0.171968	0.0515903	0.166308	159	6
3	5	0.0428525	0.237965	0.198304	0.0793216	0.142842	0.185694	0.157126	0.198304	0.0594912	0.142842	160	1
3	5	0.0472872	0.216083	0.180069	0.0720277	0.157624	0.204911	0.173386	0.180069	0.0540208	0.157624	161	2
3	5	0.0393312	0.263387	0.219489	0.0877957	0.131104	0.170435	0.144214	0.219489	0.0658467	0.131104	162	5
3	5	0.0428525	0.237965	0.198304	0.0793216	0.142842	0.185694	0.157126	0.198304	0.0594912	0.142842	163	6
3	5	0.0378705	0.277538	0.231282	0.0925128	0.126235	0.164106	0.138859	0.231282	0.0693846	0.126235	164	3
3	5	0.0449468	0.226603	0.188836	0.0755345	0.149823	0.194769	0.164805	0.188836	0.0566508	0.149823	165	1
3	5	0.0393312	0.263387	0.219489	0.0877957	0.131104	0.170435	0.144214	0.219489	0.0658467	0.131104	166	6
3	5	0.0300072	0.144489	0.120407	0.0481629	0.100024	0.130031	0.110026	0.120407	0.0361222	0.100024	167	2
3	5	0.0428525	0.250211	0.208509	0.0834037	0.142842	0.185694	0.157126	0.208509	0.0625528	0.142842	168	1
3	5	0.0498923	0.216083	0.180069	0.0720277	0.166308	0.2162	0.182938	0.180069	0.0540208	0.166308	169	3
3	5	0.0449468	0.237965	0.198304	0.0793216	0.149823	0.194769	0.164805	0.198304	0.0594912	0.149823	170	6
3	5	0.0472872	0.226603	0.188836	0.0755345	0.157624	0.204911	0.173386	0.188836	0.0566508	0.157624	171	2
3	5	0.0409863	0.263387	0.219489	0.0877957	0.136621	0.177607	0.150283	0.219489	0.0658467	0.136621	172	1
3	5	0.0428525	0.250211	0.208509	0.0834037	0.142842	0.185694	0.157126	0.208509	0.0625528	0.142842	173	1
3	5	0.0393312	0.277538	0.231282	0.0925128	0.131104	0.170435	0.144214	0.231282	0.0693846	0.131104	174	6
3	5	0.0449468	0.237965	0.198304	0.0793216	0.149823	0.194769	0.164805	0.198304	0.0594912	0.149823	175	4
3	5	0.0393312	0.277538	0.231282	0.0925128	0.131104	0.170435	0.144214	0.231282	0.0693846	0.131104	176	2
3	5	0.0300072	0.148323	0.123603	0.0494411	0.100024	0.130031	0.110026	0.123603	0.0370808	0.100024	177	5
3	5	0.0449468	0.250211	0.208509	0.0834037	0.149823	0.194769	0.164805	0.208509	0.0625528	0.149823	178	3
3	5	0.0498923	0.226603	0.188836	0.0755345	0.166308	0.2162	0.182938	0.188836	0.0566508	0.166308	179	2
3	5	0.0449468	0.250211	0.208509	0.0834037	0.149823	0.194769	0.164805	0.208509	0.0625528	0.149823	180	3
3	5	0.0472872	0.237965	0.198304	0.0793216	0.157624	0.204911	0.173386	0.198304	0.0594912	0.157624	181	5
3	5	0.0428525	0.263387	0.219489	0.0877957	0.142842	0.185694	0.157126	0.219489	0.0658467	0.142842	182	6
3	5	0.0428525	0.263387	0.219489	0.0877957	0.142842	0.185694	0.157126	0.219489	0.0658467	0.142842	183	4
3	5	0.0393312	0.292712	0.243927	0.0975708	0.131104	0.170435	0.144214	0.243927	0.0731781	0.131104	184	5
3	5	0.0449468	0.250211	0.208509	0.0834037	0.149823	0.194769	0.164805	0.208509	0.0625528	0.149823	185	2
3	5	0.0393312	0.292712	0.243927	0.0975708	0.131104	0.170435	0.144214	0.243927	0.0731781	0.131104	186	1
3	5	0.0300072	0.152592	0.12716	0.0508638	0.100024	0.130031	0.110026	0.12716	0.0381479	0.100024	187	6
3	5	0.0449468	0.263387	0.219489	0.0877957	0.149823	0.194769	0.164805	0.219489	0.0658467	0.149823	188	3
3	5	0.0498923	0.237965	0.198304	0.0793216	0.166308	0.2162	0.182938	0.198304	0.0594912	0.166308	189	2
3	5	0.0472872	0.250211	0.208509	0.0834037	0.157624	0.204911	0.173386	0.208509	0.0625528	0.157624	190	5
3	5	0.0472872	0.250211	0.208509	0.0834037	0.157624	0.204911	0.173386	0.208509	0.0625528	0.157624	191	1
3	5	0.0428525	0.277538	0.231282	0.0925128	0.142842	0.185694	0.157126	0.231282	0.0693846	0.142842	192	5
3	5	0.0428525	0.277538	0.231282	0.0925128	0.142842	0.185694	0.157126	0.231282	0.0693846	0.142842	193	5
3	5	0.0409863	0.292712	0.243927	0.0975708	0.136621	0.177607	0.150283	0.243927	0.0731781	0.136621	194	1
3	5	0.0449468	0.263387	0.219489	0.0877957	0.149823	0.194769	0.164805	0.219489	0.0658467	0.149823	195	3
3	5	0.0409863	0.292712	0.243927	0.0975708	0.136621	0.177607	0.150283	0.243927	0.0731781	0.136621	196	1
3	5	0.0300176	0.152592	0.12716	0.0508638	0.100059	0.130076	0.110064	0.12716	0.0381479	0.100059	197	4
3	5	0.0472872	0.263387	0.219489	0.0877957	0.157624	0.204911	0.173386	0.219489	0.0658467	0.157624	198	6
3	5	0.0498923	0.250211	0.208509	0.0834037	0.166308	0.2162	0.182938	0.208509	0.0625528	0.166308	199	2
3	5	0.0472872	0.263387	0.219489	0.0877957	0.157624	0.204911	0.173386	0.219489	0.0658467	0.157624	200	4
3	5	0.0498923	0.250211	0.208509	0.0834037	0.166308	0.2162	0.182938	0.208509	0.0625528	0.166308	201	3
3	5	0.0428525	0.292712	0.243927	0.0975708	0.142842	0.185694	0.157126	0.243927	0.0731781	0.142842	202	6
3	5	0.0428525	0.292712	0.243927	0.0975708	0.142842	0.185694	0.157126	0.243927	0.0731781	0.142842	203	4
3	5	0.0409863	0.308957	0.257464	0.102986	0.136621	0.177607	0.150283	0.257464	0.0772392	0.136621	204	6
3	5	0.0472872	0.263387	0.219489	0.0877957	0.157624	0.204911	0.173386	0.219489	0.0658467	0.157624	205	2
3	5	0.0428525	0.292712	0.243927	0.0975708	0.142842	0.185694	0.157126	0.243927	0.0731781	0.142842	206	5
3	5	0.0300176	0.157325	0.131104	0.0524416	0.100059	0.130076	0.110064	0.131104	0.0393312	0.100059	207	5
3	5	0.0472872	0.277538	0.231282	0.0925128	0.157624	0.204911	0.173386	0.231282	0.0693846	0.157624	208	5
3	5	0.0498923	0.263387	0.219489	0.0877957	0.166308	0.2162	0.182938	0.219489	0.0658467	0.166308	209	1
3	5	0.0472872	0.277538	0.231282	0.0925128	0.157624	0.204911	0.173386	0.231282	0.0693846	0.157624	210	3
3	5	0.0498923	0.263387	0.219489	0.0877957	0.166308	0.2162	0.182938	0.219489	0.0658467	0.166308	211	2
3	5	0.0428525	0.308957	0.257464	0.102986	0.142842	0.185694	0.157126	0.257464	0.0772392	0.142842	212	5
3	5	0.0449468	0.292712	0.243927	0.0975708	0.149823	0.194769	0.164805	0.243927	0.0731781	0.149823	213	4
3	5	0.0428525	0.308957	0.257464	0.102986	0.142842	0.185694	0.157126	0.257464	0.0772392	0.142842	214	6
3	5	0.0472872	0.277538	0.231282	0.0925128	0.157624	0.204911	0.173386	0.231282	0.0693846	0.157624	215	3
3	5	0.0428525	0.308957	0.257464	0.102986	0.142842	0.185694	0.157126	0.257464	0.0772392	0.142842	216	1

## Sheet: scenario 4
real-time travel time information
currentScene	currentEvolve	section 1	section 2	section 3	section 4	section 5	section 6	section 7	section 8	section 9	section 10	currentPersonNo	roadSelect
4	1	0.03	0.12	0.1	0.04	0.1	0.13	0.11	0.1	0.03	0.1	1	3
4	2	0.0300005	0.120002	0.151315	0.0605261	0.100002	0.130002	0.110002	0.151315	0.0453946	0.100002	1	4
4	3	0.0393312	0.157325	0.100796	0.0403185	0.131104	0.170435	0.144214	0.100796	0.0302389	0.131104	1	2
4	4	0.0300072	0.120029	0.140265	0.0561061	0.100024	0.130031	0.110026	0.140265	0.0420796	0.100024	1	2
4	5	0.0428525	0.17141	0.100384	0.0401536	0.142842	0.185694	0.157126	0.100384	0.0301152	0.142842	1	3
4	1	0.0300023	0.120009	0.145539	0.0582157	0.100008	0.13001	0.110008	0.145539	0.0436618	0.100008	2	2
4	2	0.0393312	0.157325	0.100796	0.0403185	0.131104	0.170435	0.144214	0.100796	0.0302389	0.131104	2	4
4	3	0.0300023	0.120009	0.145539	0.0582157	0.100008	0.13001	0.110008	0.145539	0.0436618	0.100008	2	1
4	4	0.0428525	0.17141	0.100384	0.0401536	0.142842	0.185694	0.157126	0.100384	0.0301152	0.142842	2	3
4	5	0.03	0.12	0.157624	0.0630496	0.1	0.13	0.11	0.157624	0.0472872	0.1	2	2
4	1	0.03	0.12	0.1	0.04	0.1	0.13	0.11	0.1	0.03	0.1	3	4
4	2	0.0300005	0.120002	0.157624	0.0630496	0.100002	0.130002	0.110002	0.157624	0.0472872	0.100002	3	1
4	3	0.0393312	0.157325	0.101097	0.0404387	0.131104	0.170435	0.144214	0.101097	0.030329	0.131104	3	5
4	4	0.0300072	0.120029	0.145539	0.0582157	0.100024	0.130031	0.110026	0.145539	0.0436618	0.100024	3	3
4	5	0.0428525	0.17141	0.100562	0.0402249	0.142842	0.185694	0.157126	0.100562	0.0301687	0.142842	3	5
4	1	0.0300023	0.120009	0.151315	0.0605261	0.100008	0.13001	0.110008	0.151315	0.0453946	0.100008	4	3
4	2	0.0393312	0.157325	0.101097	0.0404387	0.131104	0.170435	0.144214	0.101097	0.030329	0.131104	4	2
4	3	0.0300072	0.120029	0.145539	0.0582157	0.100024	0.130031	0.110026	0.145539	0.0436618	0.100024	4	3
4	4	0.0428525	0.17141	0.100562	0.0402249	0.142842	0.185694	0.157126	0.100562	0.0301687	0.142842	4	6
4	5	0.03	0.12	0.164497	0.0657989	0.1	0.13	0.11	0.164497	0.0493492	0.1	4	1
4	1	0.03	0.12	0.100001	0.0400002	0.1	0.13	0.11	0.100001	0.0300002	0.1	5	5
4	2	0.0300023	0.120009	0.157624	0.0630496	0.100008	0.13001	0.110008	0.157624	0.0472872	0.100008	5	3
4	3	0.0393312	0.157325	0.101475	0.0405901	0.131104	0.170435	0.144214	0.101475	0.0304426	0.131104	5	2
4	4	0.0300072	0.120029	0.151315	0.0605261	0.100024	0.130031	0.110026	0.151315	0.0453946	0.100024	5	6
4	5	0.0428525	0.17141	0.100796	0.0403185	0.142842	0.185694	0.157126	0.100796	0.0302389	0.142842	5	3
4	1	0.0300072	0.120029	0.151315	0.0605261	0.100024	0.130031	0.110026	0.151315	0.0453946	0.100024	6	4
4	2	0.0393312	0.157325	0.101475	0.0405901	0.131104	0.170435	0.144214	0.101475	0.0304426	0.131104	6	4
4	3	0.0300072	0.120029	0.151315	0.0605261	0.100024	0.130031	0.110026	0.151315	0.0453946	0.100024	6	3
4	4	0.0428525	0.17141	0.100796	0.0403185	0.142842	0.185694	0.157126	0.100796	0.0302389	0.142842	6	5
4	5	0.0300005	0.120002	0.164497	0.0657989	0.100002	0.130002	0.110002	0.164497	0.0493492	0.100002	6	5
4	1	0.03	0.12	0.100003	0.0400012	0.1	0.13	0.11	0.100003	0.0300009	0.1	7	4
4	2	0.0300023	0.120009	0.164497	0.0657989	0.100008	0.13001	0.110008	0.164497	0.0493492	0.100008	7	1
4	3	0.0393312	0.157325	0.101944	0.0407776	0.131104	0.170435	0.144214	0.101944	0.0305832	0.131104	7	3
4	4	0.0300072	0.120029	0.157624	0.0630496	0.100024	0.130031	0.110026	0.157624	0.0472872	0.100024	7	1
4	5	0.0428525	0.17141	0.101097	0.0404387	0.142842	0.185694	0.157126	0.101097	0.030329	0.142842	7	6
4	1	0.0300072	0.120029	0.157624	0.0630496	0.100024	0.130031	0.110026	0.157624	0.0472872	0.100024	8	1
4	2	0.0393312	0.157325	0.101944	0.0407776	0.131104	0.170435	0.144214	0.101944	0.0305832	0.131104	8	3
4	3	0.0300072	0.120029	0.157624	0.0630496	0.100024	0.130031	0.110026	0.157624	0.0472872	0.100024	8	5
4	4	0.0428525	0.17141	0.101097	0.0404387	0.142842	0.185694	0.157126	0.101097	0.030329	0.142842	8	3
4	5	0.0300005	0.120002	0.171968	0.0687871	0.100002	0.130002	0.110002	0.171968	0.0515903	0.100002	8	1
4	1	0.03	0.12	0.100003	0.0400012	0.1	0.13	0.11	0.100003	0.0300009	0.1	9	3
4	2	0.0300072	0.120029	0.164497	0.0657989	0.100024	0.130031	0.110026	0.164497	0.0493492	0.100024	9	6
4	3	0.0393312	0.157325	0.102517	0.0410066	0.131104	0.170435	0.144214	0.102517	0.030755	0.131104	9	3
4	4	0.0300176	0.12007	0.157624	0.0630496	0.100059	0.130076	0.110064	0.157624	0.0472872	0.100059	9	1
4	5	0.0428525	0.17141	0.101475	0.0405901	0.142842	0.185694	0.157126	0.101475	0.0304426	0.142842	9	3
4	1	0.0300176	0.12007	0.157624	0.0630496	0.100059	0.130076	0.110064	0.157624	0.0472872	0.100059	10	3
4	2	0.0393312	0.157325	0.102517	0.0410066	0.131104	0.170435	0.144214	0.102517	0.030755	0.131104	10	3
4	3	0.0300176	0.12007	0.157624	0.0630496	0.100059	0.130076	0.110064	0.157624	0.0472872	0.100059	10	4
4	4	0.0428525	0.17141	0.101475	0.0405901	0.142842	0.185694	0.157126	0.101475	0.0304426	0.142842	10	3
4	5	0.0300023	0.120009	0.171968	0.0687871	0.100008	0.13001	0.110008	0.171968	0.0515903	0.100008	10	1
4	1	0.03	0.12	0.10001	0.0400039	0.1	0.13	0.11	0.10001	0.0300029	0.1	11	2
4	2	0.0300176	0.12007	0.164497	0.0657989	0.100059	0.130076	0.110064	0.164497	0.0493492	0.100059	11	3
4	3	0.0393312	0.157325	0.103207	0.0412829	0.131104	0.170435	0.144214	0.103207	0.0309622	0.131104	11	4
4	4	0.0300365	0.120146	0.157624	0.0630496	0.100122	0.130158	0.110134	0.157624	0.0472872	0.100122	11	1
4	5	0.0428525	0.17141	0.101944	0.0407776	0.142842	0.185694	0.157126	0.101944	0.0305832	0.142842	11	3
4	1	0.0300176	0.12007	0.164497	0.0657989	0.100059	0.130076	0.110064	0.164497	0.0493492	0.100059	12	1
4	2	0.0393312	0.157325	0.103207	0.0412829	0.131104	0.170435	0.144214	0.103207	0.0309622	0.131104	12	5
4	3	0.0300365	0.120146	0.157624	0.0630496	0.100122	0.130158	0.110134	0.157624	0.0472872	0.100122	12	6
4	4	0.0428525	0.17141	0.101944	0.0407776	0.142842	0.185694	0.157126	0.101944	0.0305832	0.142842	12	4
4	5	0.0300072	0.120029	0.171968	0.0687871	0.100024	0.130031	0.110026	0.171968	0.0515903	0.100024	12	1
4	1	0.03	0.12	0.100024	0.0400096	0.1	0.13	0.11	0.100024	0.0300072	0.1	13	3
4	2	0.0300365	0.120146	0.164497	0.0657989	0.100122	0.130158	0.110134	0.164497	0.0493492	0.100122	13	5
4	3	0.0393312	0.157325	0.104031	0.0416124	0.131104	0.170435	0.144214	0.104031	0.0312093	0.131104	13	6
4	4	0.0300675	0.12027	0.157624	0.0630496	0.100225	0.130293	0.110248	0.157624	0.0472872	0.100225	13	3
4	5	0.0428525	0.17141	0.102517	0.0410066	0.142842	0.185694	0.157126	0.102517	0.030755	0.142842	13	3
4	1	0.0300365	0.120146	0.164497	0.0657989	0.100122	0.130158	0.110134	0.164497	0.0493492	0.100122	14	3
4	2	0.0393312	0.157325	0.104031	0.0416124	0.131104	0.170435	0.144214	0.104031	0.0312093	0.131104	14	3
4	3	0.0300675	0.12027	0.157624	0.0630496	0.100225	0.130293	0.110248	0.157624	0.0472872	0.100225	14	3
4	4	0.0428525	0.17141	0.102517	0.0410066	0.142842	0.185694	0.157126	0.102517	0.030755	0.142842	14	4
4	5	0.0300176	0.12007	0.171968	0.0687871	0.100059	0.130076	0.110064	0.171968	0.0515903	0.100059	14	1
4	1	0.03	0.12	0.10005	0.0400199	0.1	0.13	0.11	0.10005	0.0300149	0.1	15	6
4	2	0.0300675	0.12027	0.164497	0.0657989	0.100225	0.130293	0.110248	0.164497	0.0493492	0.100225	15	6
4	3	0.0393312	0.157325	0.105004	0.0420017	0.131104	0.170435	0.144214	0.105004	0.0315013	0.131104	15	3
4	4	0.0300675	0.12027	0.164497	0.0657989	0.100225	0.130293	0.110248	0.164497	0.0493492	0.100225	15	3
4	5	0.0428525	0.17141	0.103207	0.0412829	0.142842	0.185694	0.157126	0.103207	0.0309622	0.142842	15	3
4	1	0.0300365	0.120146	0.171968	0.0687871	0.100122	0.130158	0.110134	0.171968	0.0515903	0.100122	16	1
4	2	0.0393312	0.157325	0.105004	0.0420017	0.131104	0.170435	0.144214	0.105004	0.0315013	0.131104	16	3
4	3	0.0300675	0.12027	0.164497	0.0657989	0.100225	0.130293	0.110248	0.164497	0.0493492	0.100225	16	4
4	4	0.0428525	0.17141	0.103207	0.0412829	0.142842	0.185694	0.157126	0.103207	0.0309622	0.142842	16	4
4	5	0.0300365	0.120146	0.171968	0.0687871	0.100122	0.130158	0.110134	0.171968	0.0515903	0.100122	16	1
4	1	0.03	0.12	0.100092	0.0400369	0.1	0.13	0.11	0.100092	0.0300277	0.1	17	3
4	2	0.0301152	0.120461	0.164497	0.0657989	0.100384	0.130499	0.110422	0.164497	0.0493492	0.100384	17	6
4	3	0.0393312	0.157325	0.106144	0.0424576	0.131104	0.170435	0.144214	0.106144	0.0318432	0.131104	17	6
4	4	0.0300675	0.12027	0.171968	0.0687871	0.100225	0.130293	0.110248	0.171968	0.0515903	0.100225	17	1
4	5	0.0428525	0.17141	0.104031	0.0416124	0.142842	0.185694	0.157126	0.104031	0.0312093	0.142842	17	4
4	1	0.0300675	0.12027	0.171968	0.0687871	0.100225	0.130293	0.110248	0.171968	0.0515903	0.100225	18	4
4	2	0.0393312	0.157325	0.106144	0.0424576	0.131104	0.170435	0.144214	0.106144	0.0318432	0.131104	18	5
4	3	0.0301152	0.120461	0.164497	0.0657989	0.100384	0.130499	0.110422	0.164497	0.0493492	0.100384	18	1
4	4	0.0428525	0.17141	0.104031	0.0416124	0.142842	0.185694	0.157126	0.104031	0.0312093	0.142842	18	6
4	5	0.0300675	0.12027	0.171968	0.0687871	0.100225	0.130293	0.110248	0.171968	0.0515903	0.100225	18	3
4	1	0.03	0.12	0.100157	0.0400629	0.1	0.13	0.11	0.100157	0.0300472	0.1	19	6
4	2	0.0301845	0.120738	0.164497	0.0657989	0.100615	0.1308	0.110677	0.164497	0.0493492	0.100615	19	1
4	3	0.0393312	0.157325	0.107468	0.0429872	0.131104	0.170435	0.144214	0.107468	0.0322404	0.131104	19	4
4	4	0.0301152	0.120461	0.171968	0.0687871	0.100384	0.130499	0.110422	0.171968	0.0515903	0.100384	19	1
4	5	0.0428525	0.17141	0.105004	0.0420017	0.142842	0.185694	0.157126	0.105004	0.0315013	0.142842	19	5
4	1	0.0300675	0.12027	0.180069	0.0720277	0.100225	0.130293	0.110248	0.180069	0.0540208	0.100225	20	5
4	2	0.0393312	0.157325	0.107468	0.0429872	0.131104	0.170435	0.144214	0.107468	0.0322404	0.131104	20	4
4	3	0.0301845	0.120738	0.164497	0.0657989	0.100615	0.1308	0.110677	0.164497	0.0493492	0.100615	20	1
4	4	0.0428525	0.17141	0.105004	0.0420017	0.142842	0.185694	0.157126	0.105004	0.0315013	0.142842	20	4
4	5	0.0301152	0.120461	0.171968	0.0687871	0.100384	0.130499	0.110422	0.171968	0.0515903	0.100384	20	6
4	1	0.03	0.12	0.100252	0.0401008	0.1	0.13	0.11	0.100252	0.0300756	0.1	21	5
4	2	0.0302813	0.121125	0.164497	0.0657989	0.100938	0.131219	0.111031	0.164497	0.0493492	0.100938	21	1
4	3	0.0393312	0.157325	0.108995	0.0435982	0.131104	0.170435	0.144214	0.108995	0.0326986	0.131104	21	5
4	4	0.0301845	0.120738	0.171968	0.0687871	0.100615	0.1308	0.110677	0.171968	0.0515903	0.100615	21	4
4	5	0.0428525	0.17141	0.106144	0.0424576	0.142842	0.185694	0.157126	0.106144	0.0318432	0.142842	21	6
4	1	0.0301152	0.120461	0.180069	0.0720277	0.100384	0.130499	0.110422	0.180069	0.0540208	0.100384	22	1
4	2	0.0393312	0.157325	0.108995	0.0435982	0.131104	0.170435	0.144214	0.108995	0.0326986	0.131104	22	5
4	3	0.0302813	0.121125	0.164497	0.0657989	0.100938	0.131219	0.111031	0.164497	0.0493492	0.100938	22	5
4	4	0.0428525	0.17141	0.106144	0.0424576	0.142842	0.185694	0.157126	0.106144	0.0318432	0.142842	22	3
4	5	0.0301845	0.120738	0.171968	0.0687871	0.100615	0.1308	0.110677	0.171968	0.0515903	0.100615	22	1
4	1	0.03	0.12	0.100384	0.0401536	0.1	0.13	0.11	0.100384	0.0301152	0.1	23	2
4	2	0.0304118	0.121647	0.164497	0.0657989	0.101373	0.131784	0.11151	0.164497	0.0493492	0.101373	23	1
4	3	0.0393312	0.157325	0.110746	0.0442984	0.131104	0.170435	0.144214	0.110746	0.0332238	0.131104	23	4
4	4	0.0302813	0.121125	0.171968	0.0687871	0.100938	0.131219	0.111031	0.171968	0.0515903	0.100938	23	6
4	5	0.0428525	0.17141	0.107468	0.0429872	0.142842	0.185694	0.157126	0.107468	0.0322404	0.142842	23	4
4	1	0.0301845	0.120738	0.180069	0.0720277	0.100615	0.1308	0.110677	0.180069	0.0540208	0.100615	24	1
4	2	0.0393312	0.157325	0.110746	0.0442984	0.131104	0.170435	0.144214	0.110746	0.0332238	0.131104	24	5
4	3	0.0304118	0.121647	0.164497	0.0657989	0.101373	0.131784	0.11151	0.164497	0.0493492	0.101373	24	4
4	4	0.0428525	0.17141	0.107468	0.0429872	0.142842	0.185694	0.157126	0.107468	0.0322404	0.142842	24	6
4	5	0.0302813	0.121125	0.171968	0.0687871	0.100938	0.131219	0.111031	0.171968	0.0515903	0.100938	24	1
4	1	0.03	0.12	0.100562	0.0402249	0.1	0.13	0.11	0.100562	0.0301687	0.1	25	3
4	2	0.0305832	0.122333	0.164497	0.0657989	0.101944	0.132527	0.112138	0.164497	0.0493492	0.101944	25	6
4	3	0.0393312	0.157325	0.11274	0.0450961	0.131104	0.170435	0.144214	0.11274	0.0338221	0.131104	25	4
4	4	0.0304118	0.121647	0.171968	0.0687871	0.101373	0.131784	0.11151	0.171968	0.0515903	0.101373	25	1
4	5	0.0428525	0.17141	0.108995	0.0435982	0.142842	0.185694	0.157126	0.108995	0.0326986	0.142842	25	5
4	1	0.0302813	0.121125	0.180069	0.0720277	0.100938	0.131219	0.111031	0.180069	0.0540208	0.100938	26	6
4	2	0.0393312	0.157325	0.11274	0.0450961	0.131104	0.170435	0.144214	0.11274	0.0338221	0.131104	26	6
4	3	0.0305832	0.122333	0.164497	0.0657989	0.101944	0.132527	0.112138	0.164497	0.0493492	0.101944	26	1
4	4	0.0428525	0.17141	0.108995	0.0435982	0.142842	0.185694	0.157126	0.108995	0.0326986	0.142842	26	3
4	5	0.0304118	0.121647	0.171968	0.0687871	0.101373	0.131784	0.11151	0.171968	0.0515903	0.101373	26	1
4	1	0.03	0.12	0.100796	0.0403185	0.1	0.13	0.11	0.100796	0.0302389	0.1	27	4
4	2	0.0308033	0.123213	0.164497	0.0657989	0.102678	0.133481	0.112945	0.164497	0.0493492	0.102678	27	4
4	3	0.0393312	0.157325	0.115	0.046	0.131104	0.170435	0.144214	0.115	0.0345	0.131104	27	3
4	4	0.0305832	0.122333	0.171968	0.0687871	0.101944	0.132527	0.112138	0.171968	0.0515903	0.101944	27	1
4	5	0.0428525	0.17141	0.110746	0.0442984	0.142842	0.185694	0.157126	0.110746	0.0332238	0.142842	27	5
4	1	0.0304118	0.121647	0.180069	0.0720277	0.101373	0.131784	0.11151	0.180069	0.0540208	0.101373	28	3
4	2	0.0393312	0.157325	0.115	0.046	0.131104	0.170435	0.144214	0.115	0.0345	0.131104	28	6
4	3	0.0308033	0.123213	0.164497	0.0657989	0.102678	0.133481	0.112945	0.164497	0.0493492	0.102678	28	1
4	4	0.0428525	0.17141	0.110746	0.0442984	0.142842	0.185694	0.157126	0.110746	0.0332238	0.142842	28	3
4	5	0.0305832	0.122333	0.171968	0.0687871	0.101944	0.132527	0.112138	0.171968	0.0515903	0.101944	28	5
4	1	0.03	0.12	0.101097	0.0404387	0.1	0.13	0.11	0.101097	0.030329	0.1	29	5
4	2	0.0310805	0.124322	0.164497	0.0657989	0.103602	0.134682	0.113962	0.164497	0.0493492	0.103602	29	1
4	3	0.0393312	0.157325	0.117548	0.0470192	0.131104	0.170435	0.144214	0.117548	0.0352644	0.131104	29	4
4	4	0.0308033	0.123213	0.171968	0.0687871	0.102678	0.133481	0.112945	0.171968	0.0515903	0.102678	29	1
4	5	0.0428525	0.17141	0.11274	0.0450961	0.142842	0.185694	0.157126	0.11274	0.0338221	0.142842	29	3
4	1	0.0305832	0.122333	0.180069	0.0720277	0.101944	0.132527	0.112138	0.180069	0.0540208	0.101944	30	6
4	2	0.0393312	0.157325	0.117548	0.0470192	0.131104	0.170435	0.144214	0.117548	0.0352644	0.131104	30	5
4	3	0.0310805	0.124322	0.164497	0.0657989	0.103602	0.134682	0.113962	0.164497	0.0493492	0.103602	30	1
4	4	0.0428525	0.17141	0.11274	0.0450961	0.142842	0.185694	0.157126	0.11274	0.0338221	0.142842	30	6
4	5	0.0308033	0.123213	0.171968	0.0687871	0.102678	0.133481	0.112945	0.171968	0.0515903	0.102678	30	1
4	1	0.03	0.12	0.101475	0.0405901	0.1	0.13	0.11	0.101475	0.0304426	0.1	31	4
4	2	0.0314238	0.125695	0.164497	0.0657989	0.104746	0.13617	0.115221	0.164497	0.0493492	0.104746	31	1
4	3	0.0393312	0.157325	0.120407	0.0481629	0.131104	0.170435	0.144214	0.120407	0.0361222	0.131104	31	4
4	4	0.0310805	0.124322	0.171968	0.0687871	0.103602	0.134682	0.113962	0.171968	0.0515903	0.103602	31	6
4	5	0.0428525	0.17141	0.115	0.046	0.142842	0.185694	0.157126	0.115	0.0345	0.142842	31	1
4	1	0.0308033	0.123213	0.180069	0.0720277	0.102678	0.133481	0.112945	0.180069	0.0540208	0.102678	32	3
4	2	0.0393312	0.157325	0.120407	0.0481629	0.131104	0.170435	0.144214	0.120407	0.0361222	0.131104	32	1
4	3	0.0314238	0.125695	0.164497	0.0657989	0.104746	0.13617	0.115221	0.164497	0.0493492	0.104746	32	1
4	4	0.0428525	0.17141	0.115	0.046	0.142842	0.185694	0.157126	0.115	0.0345	0.142842	32	6
4	5	0.0310805	0.124322	0.171968	0.0687871	0.103602	0.134682	0.113962	0.171968	0.0515903	0.103602	32	1
4	1	0.0300005	0.120002	0.101475	0.0405901	0.100002	0.130002	0.110002	0.101475	0.0304426	0.100002	33	3
4	2	0.0318432	0.127373	0.164497	0.0657989	0.106144	0.137987	0.116758	0.164497	0.0493492	0.106144	33	1
4	3	0.0393312	0.157325	0.123603	0.0494411	0.131104	0.170435	0.144214	0.123603	0.0370808	0.131104	33	6
4	4	0.0314238	0.125695	0.171968	0.0687871	0.104746	0.13617	0.115221	0.171968	0.0515903	0.104746	33	5
4	5	0.0449468	0.179787	0.115	0.046	0.149823	0.194769	0.164805	0.115	0.0345	0.149823	33	5
4	1	0.0310805	0.124322	0.180069	0.0720277	0.103602	0.134682	0.113962	0.180069	0.0540208	0.103602	34	1
4	2	0.0409863	0.163945	0.120407	0.0481629	0.136621	0.177607	0.150283	0.120407	0.0361222	0.136621	34	4
4	3	0.0318432	0.127373	0.164497	0.0657989	0.106144	0.137987	0.116758	0.164497	0.0493492	0.106144	34	1
4	4	0.0449468	0.179787	0.115	0.046	0.149823	0.194769	0.164805	0.115	0.0345	0.149823	34	3
4	5	0.0314238	0.125695	0.171968	0.0687871	0.104746	0.13617	0.115221	0.171968	0.0515903	0.104746	34	5
4	1	0.0300005	0.120002	0.101944	0.0407776	0.100002	0.130002	0.110002	0.101944	0.0305832	0.100002	35	4
4	2	0.032349	0.129396	0.164497	0.0657989	0.10783	0.140179	0.118613	0.164497	0.0493492	0.10783	35	5
4	3	0.0393312	0.157325	0.12716	0.0508638	0.131104	0.170435	0.144214	0.12716	0.0381479	0.131104	35	6
4	4	0.0318432	0.127373	0.171968	0.0687871	0.106144	0.137987	0.116758	0.171968	0.0515903	0.106144	35	3
4	5	0.0449468	0.179787	0.117548	0.0470192	0.149823	0.194769	0.164805	0.117548	0.0352644	0.149823	35	5
4	1	0.0314238	0.125695	0.180069	0.0720277	0.104746	0.13617	0.115221	0.180069	0.0540208	0.104746	36	4
4	2	0.0409863	0.163945	0.123603	0.0494411	0.136621	0.177607	0.150283	0.123603	0.0370808	0.136621	36	5
4	3	0.032349	0.129396	0.164497	0.0657989	0.10783	0.140179	0.118613	0.164497	0.0493492	0.10783	36	1
4	4	0.0449468	0.179787	0.117548	0.0470192	0.149823	0.194769	0.164805	0.117548	0.0352644	0.149823	36	6
4	5	0.0314238	0.125695	0.180069	0.0720277	0.104746	0.13617	0.115221	0.180069	0.0540208	0.104746	36	5
4	1	0.0300005	0.120002	0.102517	0.0410066	0.100002	0.130002	0.110002	0.102517	0.030755	0.100002	37	6
4	2	0.032349	0.129396	0.171968	0.0687871	0.10783	0.140179	0.118613	0.171968	0.0515903	0.10783	37	3
4	3	0.0393312	0.157325	0.131104	0.0524416	0.131104	0.170435	0.144214	0.131104	0.0393312	0.131104	37	6
4	4	0.0318432	0.127373	0.180069	0.0720277	0.106144	0.137987	0.116758	0.180069	0.0540208	0.106144	37	5
4	5	0.0449468	0.179787	0.120407	0.0481629	0.149823	0.194769	0.164805	0.120407	0.0361222	0.149823	37	4
4	1	0.0314238	0.125695	0.188836	0.0755345	0.104746	0.13617	0.115221	0.188836	0.0566508	0.104746	38	4
4	2	0.0409863	0.163945	0.12716	0.0508638	0.136621	0.177607	0.150283	0.12716	0.0381479	0.136621	38	4
4	3	0.032349	0.129396	0.171968	0.0687871	0.10783	0.140179	0.118613	0.171968	0.0515903	0.10783	38	1
4	4	0.0449468	0.179787	0.120407	0.0481629	0.149823	0.194769	0.164805	0.120407	0.0361222	0.149823	38	6
4	5	0.0314238	0.125695	0.188836	0.0755345	0.104746	0.13617	0.115221	0.188836	0.0566508	0.104746	38	6
4	1	0.0300005	0.120002	0.103207	0.0412829	0.100002	0.130002	0.110002	0.103207	0.0309622	0.100002	39	5
4	2	0.032349	0.129396	0.180069	0.0720277	0.10783	0.140179	0.118613	0.180069	0.0540208	0.10783	39	1
4	3	0.0393312	0.157325	0.135463	0.0541853	0.131104	0.170435	0.144214	0.135463	0.040639	0.131104	39	5
4	4	0.0318432	0.127373	0.188836	0.0755345	0.106144	0.137987	0.116758	0.188836	0.0566508	0.106144	39	6
4	5	0.0449468	0.179787	0.123603	0.0494411	0.149823	0.194769	0.164805	0.123603	0.0370808	0.149823	39	6
4	1	0.0318432	0.127373	0.188836	0.0755345	0.106144	0.137987	0.116758	0.188836	0.0566508	0.106144	40	1
4	2	0.0409863	0.163945	0.131104	0.0524416	0.136621	0.177607	0.150283	0.131104	0.0393312	0.136621	40	4
4	3	0.0329525	0.13181	0.171968	0.0687871	0.109842	0.142794	0.120826	0.171968	0.0515903	0.109842	40	3
4	4	0.0449468	0.179787	0.123603	0.0494411	0.149823	0.194769	0.164805	0.123603	0.0370808	0.149823	40	5
4	5	0.0314238	0.125695	0.198304	0.0793216	0.104746	0.13617	0.115221	0.198304	0.0594912	0.104746	40	1
4	1	0.0300005	0.120002	0.104031	0.0416124	0.100002	0.130002	0.110002	0.104031	0.0312093	0.100002	41	3
4	2	0.0329525	0.13181	0.180069	0.0720277	0.109842	0.142794	0.120826	0.180069	0.0540208	0.109842	41	5
4	3	0.0393312	0.157325	0.140265	0.0561061	0.131104	0.170435	0.144214	0.140265	0.0420796	0.131104	41	6
4	4	0.032349	0.129396	0.188836	0.0755345	0.10783	0.140179	0.118613	0.188836	0.0566508	0.10783	41	1
4	5	0.0449468	0.179787	0.12716	0.0508638	0.149823	0.194769	0.164805	0.12716	0.0381479	0.149823	41	4
4	1	0.032349	0.129396	0.188836	0.0755345	0.10783	0.140179	0.118613	0.188836	0.0566508	0.10783	42	1
4	2	0.0409863	0.163945	0.135463	0.0541853	0.136621	0.177607	0.150283	0.135463	0.040639	0.136621	42	2
4	3	0.0336653	0.134661	0.171968	0.0687871	0.112218	0.145883	0.123439	0.171968	0.0515903	0.112218	42	6
4	4	0.0449468	0.179787	0.12716	0.0508638	0.149823	0.194769	0.164805	0.12716	0.0381479	0.149823	42	5
4	5	0.0318432	0.127373	0.198304	0.0793216	0.106144	0.137987	0.116758	0.198304	0.0594912	0.106144	42	1
4	1	0.0300005	0.120002	0.105004	0.0420017	0.100002	0.130002	0.110002	0.105004	0.0315013	0.100002	43	4
4	2	0.0336653	0.134661	0.180069	0.0720277	0.112218	0.145883	0.123439	0.180069	0.0540208	0.112218	43	4
4	3	0.0393312	0.157325	0.145539	0.0582157	0.131104	0.170435	0.144214	0.145539	0.0436618	0.131104	43	6
4	4	0.0329525	0.13181	0.188836	0.0755345	0.109842	0.142794	0.120826	0.188836	0.0566508	0.109842	43	1
4	5	0.0449468	0.179787	0.131104	0.0524416	0.149823	0.194769	0.164805	0.131104	0.0393312	0.149823	43	1
4	1	0.0329525	0.13181	0.188836	0.0755345	0.109842	0.142794	0.120826	0.188836	0.0566508	0.109842	44	6
4	2	0.0409863	0.163945	0.140265	0.0561061	0.136621	0.177607	0.150283	0.140265	0.0420796	0.136621	44	3
4	3	0.0345	0.138	0.171968	0.0687871	0.115	0.1495	0.1265	0.171968	0.0515903	0.115	44	1
4	4	0.0449468	0.179787	0.131104	0.0524416	0.149823	0.194769	0.164805	0.131104	0.0393312	0.149823	44	4
4	5	0.032349	0.129396	0.198304	0.0793216	0.10783	0.140179	0.118613	0.198304	0.0594912	0.10783	44	4
4	1	0.0300005	0.120002	0.106144	0.0424576	0.100002	0.130002	0.110002	0.106144	0.0318432	0.100002	45	3
4	2	0.0345	0.138	0.180069	0.0720277	0.115	0.1495	0.1265	0.180069	0.0540208	0.115	45	1
4	3	0.0393312	0.157325	0.151315	0.0605261	0.131104	0.170435	0.144214	0.151315	0.0453946	0.131104	45	1
4	4	0.0336653	0.134661	0.188836	0.0755345	0.112218	0.145883	0.123439	0.188836	0.0566508	0.112218	45	5
4	5	0.0472872	0.189149	0.131104	0.0524416	0.157624	0.204911	0.173386	0.131104	0.0393312	0.157624	45	1
4	1	0.0336653	0.134661	0.188836	0.0755345	0.112218	0.145883	0.123439	0.188836	0.0566508	0.112218	46	1
4	2	0.0409863	0.163945	0.145539	0.0582157	0.136621	0.177607	0.150283	0.145539	0.0436618	0.136621	46	3
4	3	0.0354698	0.141879	0.171968	0.0687871	0.118233	0.153702	0.130056	0.171968	0.0515903	0.118233	46	3
4	4	0.0449468	0.179787	0.135463	0.0541853	0.149823	0.194769	0.164805	0.135463	0.040639	0.149823	46	5
4	5	0.0329525	0.13181	0.198304	0.0793216	0.109842	0.142794	0.120826	0.198304	0.0594912	0.109842	46	1
4	1	0.0300005	0.120002	0.107468	0.0429872	0.100002	0.130002	0.110002	0.107468	0.0322404	0.100002	47	5
4	2	0.0354698	0.141879	0.180069	0.0720277	0.118233	0.153702	0.130056	0.180069	0.0540208	0.118233	47	5
4	3	0.0409863	0.163945	0.151315	0.0605261	0.136621	0.177607	0.150283	0.151315	0.0453946	0.136621	47	4
4	4	0.0345	0.138	0.188836	0.0755345	0.115	0.1495	0.1265	0.188836	0.0566508	0.115	47	1
4	5	0.0498923	0.199569	0.131104	0.0524416	0.166308	0.2162	0.182938	0.131104	0.0393312	0.166308	47	6
4	1	0.0345	0.138	0.188836	0.0755345	0.115	0.1495	0.1265	0.188836	0.0566508	0.115	48	6
4	2	0.0409863	0.163945	0.151315	0.0605261	0.136621	0.177607	0.150283	0.151315	0.0453946	0.136621	48	3
4	3	0.0365885	0.146354	0.171968	0.0687871	0.121962	0.15855	0.134158	0.171968	0.0515903	0.121962	48	4
4	4	0.0449468	0.179787	0.140265	0.0561061	0.149823	0.194769	0.164805	0.140265	0.0420796	0.149823	48	6
4	5	0.0336653	0.134661	0.198304	0.0793216	0.112218	0.145883	0.123439	0.198304	0.0594912	0.112218	48	1
4	1	0.0300005	0.120002	0.108995	0.0435982	0.100002	0.130002	0.110002	0.108995	0.0326986	0.100002	49	6
4	2	0.0365885	0.146354	0.180069	0.0720277	0.121962	0.15855	0.134158	0.180069	0.0540208	0.121962	49	3
4	3	0.0409863	0.163945	0.157624	0.0630496	0.136621	0.177607	0.150283	0.157624	0.0472872	0.136621	49	2
4	4	0.0354698	0.141879	0.188836	0.0755345	0.118233	0.153702	0.130056	0.188836	0.0566508	0.118233	49	4
4	5	0.0498923	0.199569	0.135463	0.0541853	0.166308	0.2162	0.182938	0.135463	0.040639	0.166308	49	5
4	1	0.0354698	0.141879	0.188836	0.0755345	0.118233	0.153702	0.130056	0.188836	0.0566508	0.118233	50	5
4	2	0.0409863	0.163945	0.157624	0.0630496	0.136621	0.177607	0.150283	0.157624	0.0472872	0.136621	50	4
4	3	0.0365885	0.146354	0.180069	0.0720277	0.121962	0.15855	0.134158	0.180069	0.0540208	0.121962	50	4
4	4	0.0449468	0.179787	0.145539	0.0582157	0.149823	0.194769	0.164805	0.145539	0.0436618	0.149823	50	5
4	5	0.0345	0.138	0.198304	0.0793216	0.115	0.1495	0.1265	0.198304	0.0594912	0.115	50	1
4	1	0.0300005	0.120002	0.110746	0.0442984	0.100002	0.130002	0.110002	0.110746	0.0332238	0.100002	51	3
4	2	0.0365885	0.146354	0.188836	0.0755345	0.121962	0.15855	0.134158	0.188836	0.0566508	0.121962	51	1
4	3	0.0409863	0.163945	0.164497	0.0657989	0.136621	0.177607	0.150283	0.164497	0.0493492	0.136621	51	6
4	4	0.0365885	0.146354	0.188836	0.0755345	0.121962	0.15855	0.134158	0.188836	0.0566508	0.121962	51	3
4	5	0.0498923	0.199569	0.140265	0.0561061	0.166308	0.2162	0.182938	0.140265	0.0420796	0.166308	51	5
4	1	0.0365885	0.146354	0.188836	0.0755345	0.121962	0.15855	0.134158	0.188836	0.0566508	0.121962	52	1
4	2	0.0409863	0.163945	0.164497	0.0657989	0.136621	0.177607	0.150283	0.164497	0.0493492	0.136621	52	4
4	3	0.0365885	0.146354	0.188836	0.0755345	0.121962	0.15855	0.134158	0.188836	0.0566508	0.121962	52	1
4	4	0.0449468	0.179787	0.151315	0.0605261	0.149823	0.194769	0.164805	0.151315	0.0453946	0.149823	52	4
4	5	0.0354698	0.141879	0.198304	0.0793216	0.118233	0.153702	0.130056	0.198304	0.0594912	0.118233	52	6
4	1	0.0300005	0.120002	0.11274	0.0450961	0.100002	0.130002	0.110002	0.11274	0.0338221	0.100002	53	3
4	2	0.0378705	0.151482	0.188836	0.0755345	0.126235	0.164106	0.138859	0.188836	0.0566508	0.126235	53	5
4	3	0.0409863	0.163945	0.171968	0.0687871	0.136621	0.177607	0.150283	0.171968	0.0515903	0.136621	53	5
4	4	0.0378705	0.151482	0.188836	0.0755345	0.126235	0.164106	0.138859	0.188836	0.0566508	0.126235	53	1
4	5	0.0498923	0.199569	0.145539	0.0582157	0.166308	0.2162	0.182938	0.145539	0.0436618	0.166308	53	5
4	1	0.0378705	0.151482	0.188836	0.0755345	0.126235	0.164106	0.138859	0.188836	0.0566508	0.126235	54	4
4	2	0.0409863	0.163945	0.171968	0.0687871	0.136621	0.177607	0.150283	0.171968	0.0515903	0.136621	54	6
4	3	0.0378705	0.151482	0.188836	0.0755345	0.126235	0.164106	0.138859	0.188836	0.0566508	0.126235	54	3
4	4	0.0449468	0.179787	0.157624	0.0630496	0.149823	0.194769	0.164805	0.157624	0.0472872	0.149823	54	4
4	5	0.0365885	0.146354	0.198304	0.0793216	0.121962	0.15855	0.134158	0.198304	0.0594912	0.121962	54	1
4	1	0.0300005	0.120002	0.115	0.046	0.100002	0.130002	0.110002	0.115	0.0345	0.100002	55	5
4	2	0.0378705	0.151482	0.198304	0.0793216	0.126235	0.164106	0.138859	0.198304	0.0594912	0.126235	55	4
4	3	0.0409863	0.163945	0.180069	0.0720277	0.136621	0.177607	0.150283	0.180069	0.0540208	0.136621	55	5
4	4	0.0393312	0.157325	0.188836	0.0755345	0.131104	0.170435	0.144214	0.188836	0.0566508	0.131104	55	5
4	5	0.0498923	0.199569	0.151315	0.0605261	0.166308	0.2162	0.182938	0.151315	0.0453946	0.166308	55	3
4	1	0.0393312	0.157325	0.188836	0.0755345	0.131104	0.170435	0.144214	0.188836	0.0566508	0.131104	56	5
4	2	0.0409863	0.163945	0.180069	0.0720277	0.136621	0.177607	0.150283	0.180069	0.0540208	0.136621	56	6
4	3	0.0378705	0.151482	0.198304	0.0793216	0.126235	0.164106	0.138859	0.198304	0.0594912	0.126235	56	1
4	4	0.0449468	0.179787	0.164497	0.0657989	0.149823	0.194769	0.164805	0.164497	0.0493492	0.149823	56	4
4	5	0.0378705	0.151482	0.198304	0.0793216	0.126235	0.164106	0.138859	0.198304	0.0594912	0.126235	56	6
4	1	0.0300005	0.120002	0.117548	0.0470192	0.100002	0.130002	0.110002	0.117548	0.0352644	0.100002	57	4
4	2	0.0378705	0.151482	0.208509	0.0834037	0.126235	0.164106	0.138859	0.208509	0.0625528	0.126235	57	3
4	3	0.0428525	0.17141	0.180069	0.0720277	0.142842	0.185694	0.157126	0.180069	0.0540208	0.142842	57	1
4	4	0.0393312	0.157325	0.198304	0.0793216	0.131104	0.170435	0.144214	0.198304	0.0594912	0.131104	57	4
4	5	0.0498923	0.199569	0.157624	0.0630496	0.166308	0.2162	0.182938	0.157624	0.0472872	0.166308	57	5
4	1	0.0393312	0.157325	0.198304	0.0793216	0.131104	0.170435	0.144214	0.198304	0.0594912	0.131104	58	1
4	2	0.0409863	0.163945	0.188836	0.0755345	0.136621	0.177607	0.150283	0.188836	0.0566508	0.136621	58	3
4	3	0.0393312	0.157325	0.198304	0.0793216	0.131104	0.170435	0.144214	0.198304	0.0594912	0.131104	58	1
4	4	0.0449468	0.179787	0.171968	0.0687871	0.149823	0.194769	0.164805	0.171968	0.0515903	0.149823	58	6
4	5	0.0393312	0.157325	0.198304	0.0793216	0.131104	0.170435	0.144214	0.198304	0.0594912	0.131104	58	5
4	1	0.0300005	0.120002	0.120407	0.0481629	0.100002	0.130002	0.110002	0.120407	0.0361222	0.100002	59	5
4	2	0.0378705	0.151482	0.219489	0.0877957	0.126235	0.164106	0.138859	0.219489	0.0658467	0.126235	59	1
4	3	0.0449468	0.179787	0.180069	0.0720277	0.149823	0.194769	0.164805	0.180069	0.0540208	0.149823	59	6
4	4	0.0393312	0.157325	0.208509	0.0834037	0.131104	0.170435	0.144214	0.208509	0.0625528	0.131104	59	6
4	5	0.0498923	0.199569	0.164497	0.0657989	0.166308	0.2162	0.182938	0.164497	0.0493492	0.166308	59	5
4	1	0.0409863	0.163945	0.198304	0.0793216	0.136621	0.177607	0.150283	0.198304	0.0594912	0.136621	60	3
4	2	0.0428525	0.17141	0.188836	0.0755345	0.142842	0.185694	0.157126	0.188836	0.0566508	0.142842	60	6
4	3	0.0409863	0.163945	0.198304	0.0793216	0.136621	0.177607	0.150283	0.198304	0.0594912	0.136621	60	5
4	4	0.0449468	0.179787	0.180069	0.0720277	0.149823	0.194769	0.164805	0.180069	0.0540208	0.149823	60	2
4	5	0.0409863	0.163945	0.198304	0.0793216	0.136621	0.177607	0.150283	0.198304	0.0594912	0.136621	60	3
4	1	0.0300005	0.120002	0.123603	0.0494411	0.100002	0.130002	0.110002	0.123603	0.0370808	0.100002	61	6
4	2	0.0393312	0.157325	0.219489	0.0877957	0.131104	0.170435	0.144214	0.219489	0.0658467	0.131104	61	1
4	3	0.0449468	0.179787	0.188836	0.0755345	0.149823	0.194769	0.164805	0.188836	0.0566508	0.149823	61	6
4	4	0.0409863	0.163945	0.208509	0.0834037	0.136621	0.177607	0.150283	0.208509	0.0625528	0.136621	61	4
4	5	0.0498923	0.199569	0.171968	0.0687871	0.166308	0.2162	0.182938	0.171968	0.0515903	0.166308	61	5
4	1	0.0409863	0.163945	0.208509	0.0834037	0.136621	0.177607	0.150283	0.208509	0.0625528	0.136621	62	4
4	2	0.0428525	0.17141	0.198304	0.0793216	0.142842	0.185694	0.157126	0.198304	0.0594912	0.142842	62	5
4	3	0.0409863	0.163945	0.208509	0.0834037	0.136621	0.177607	0.150283	0.208509	0.0625528	0.136621	62	1
4	4	0.0449468	0.179787	0.188836	0.0755345	0.149823	0.194769	0.164805	0.188836	0.0566508	0.149823	62	4
4	5	0.0409863	0.163945	0.208509	0.0834037	0.136621	0.177607	0.150283	0.208509	0.0625528	0.136621	62	3
4	1	0.0300005	0.120002	0.12716	0.0508638	0.100002	0.130002	0.110002	0.12716	0.0381479	0.100002	63	4
4	2	0.0409863	0.163945	0.219489	0.0877957	0.136621	0.177607	0.150283	0.219489	0.0658467	0.136621	63	1
4	3	0.0449468	0.179787	0.198304	0.0793216	0.149823	0.194769	0.164805	0.198304	0.0594912	0.149823	63	6
4	4	0.0428525	0.17141	0.208509	0.0834037	0.142842	0.185694	0.157126	0.208509	0.0625528	0.142842	63	1
4	5	0.0498923	0.199569	0.180069	0.0720277	0.166308	0.2162	0.182938	0.180069	0.0540208	0.166308	63	2
4	1	0.0409863	0.163945	0.219489	0.0877957	0.136621	0.177607	0.150283	0.219489	0.0658467	0.136621	64	5
4	2	0.0428525	0.17141	0.208509	0.0834037	0.142842	0.185694	0.157126	0.208509	0.0625528	0.142842	64	6
4	3	0.0428525	0.17141	0.208509	0.0834037	0.142842	0.185694	0.157126	0.208509	0.0625528	0.142842	64	5
4	4	0.0449468	0.179787	0.198304	0.0793216	0.149823	0.194769	0.164805	0.198304	0.0594912	0.149823	64	5
4	5	0.0428525	0.17141	0.208509	0.0834037	0.142842	0.185694	0.157126	0.208509	0.0625528	0.142842	64	6
4	1	0.0300005	0.120002	0.131104	0.0524416	0.100002	0.130002	0.110002	0.131104	0.0393312	0.100002	65	4
4	2	0.0428525	0.17141	0.219489	0.0877957	0.142842	0.185694	0.157126	0.219489	0.0658467	0.142842	65	2
4	3	0.0449468	0.179787	0.208509	0.0834037	0.149823	0.194769	0.164805	0.208509	0.0625528	0.149823	65	6
4	4	0.0449468	0.179787	0.208509	0.0834037	0.149823	0.194769	0.164805	0.208509	0.0625528	0.149823	65	1
4	5	0.0498923	0.199569	0.188836	0.0755345	0.166308	0.2162	0.182938	0.188836	0.0566508	0.166308	65	4
4	1	0.0409863	0.163945	0.231282	0.0925128	0.136621	0.177607	0.150283	0.231282	0.0693846	0.136621	66	1
4	2	0.0428525	0.17141	0.219489	0.0877957	0.142842	0.185694	0.157126	0.219489	0.0658467	0.142842	66	6
4	3	0.0449468	0.179787	0.208509	0.0834037	0.149823	0.194769	0.164805	0.208509	0.0625528	0.149823	66	1
4	4	0.0449468	0.179787	0.208509	0.0834037	0.149823	0.194769	0.164805	0.208509	0.0625528	0.149823	66	4
4	5	0.0428525	0.17141	0.219489	0.0877957	0.142842	0.185694	0.157126	0.219489	0.0658467	0.142842	66	5
4	1	0.0300005	0.120002	0.135463	0.0541853	0.100002	0.130002	0.110002	0.135463	0.040639	0.100002	67	6
4	2	0.0428525	0.17141	0.231282	0.0925128	0.142842	0.185694	0.157126	0.231282	0.0693846	0.142842	67	4
4	3	0.0449468	0.179787	0.219489	0.0877957	0.149823	0.194769	0.164805	0.219489	0.0658467	0.149823	67	5
4	4	0.0472872	0.189149	0.208509	0.0834037	0.157624	0.204911	0.173386	0.208509	0.0625528	0.157624	67	1
4	5	0.0498923	0.199569	0.198304	0.0793216	0.166308	0.2162	0.182938	0.198304	0.0594912	0.166308	67	4
4	1	0.0428525	0.17141	0.231282	0.0925128	0.142842	0.185694	0.157126	0.231282	0.0693846	0.142842	68	2
4	2	0.0449468	0.179787	0.219489	0.0877957	0.149823	0.194769	0.164805	0.219489	0.0658467	0.149823	68	6
4	3	0.0472872	0.189149	0.208509	0.0834037	0.157624	0.204911	0.173386	0.208509	0.0625528	0.157624	68	4
4	4	0.0449468	0.179787	0.219489	0.0877957	0.149823	0.194769	0.164805	0.219489	0.0658467	0.149823	68	4
4	5	0.0428525	0.17141	0.231282	0.0925128	0.142842	0.185694	0.157126	0.231282	0.0693846	0.142842	68	5
4	1	0.0300005	0.120002	0.140265	0.0561061	0.100002	0.130002	0.110002	0.140265	0.0420796	0.100002	69	6
4	2	0.0428525	0.17141	0.243927	0.0975708	0.142842	0.185694	0.157126	0.243927	0.0731781	0.142842	69	5
4	3	0.0472872	0.189149	0.219489	0.0877957	0.157624	0.204911	0.173386	0.219489	0.0658467	0.157624	69	2
4	4	0.0498923	0.199569	0.208509	0.0834037	0.166308	0.2162	0.182938	0.208509	0.0625528	0.166308	69	1
4	5	0.0498923	0.199569	0.208509	0.0834037	0.166308	0.2162	0.182938	0.208509	0.0625528	0.166308	69	5
4	1	0.0428525	0.17141	0.243927	0.0975708	0.142842	0.185694	0.157126	0.243927	0.0731781	0.142842	70	4
4	2	0.0449468	0.179787	0.231282	0.0925128	0.149823	0.194769	0.164805	0.231282	0.0693846	0.149823	70	6
4	3	0.0472872	0.189149	0.219489	0.0877957	0.157624	0.204911	0.173386	0.219489	0.0658467	0.157624	70	6
4	4	0.0449468	0.179787	0.231282	0.0925128	0.149823	0.194769	0.164805	0.231282	0.0693846	0.149823	70	5
4	5	0.0428525	0.17141	0.243927	0.0975708	0.142842	0.185694	0.157126	0.243927	0.0731781	0.142842	70	1
4	1	0.0300005	0.120002	0.145539	0.0582157	0.100002	0.130002	0.110002	0.145539	0.0436618	0.100002	71	4
4	2	0.0428525	0.17141	0.257464	0.102986	0.142842	0.185694	0.157126	0.257464	0.0772392	0.142842	71	6
4	3	0.0472872	0.189149	0.231282	0.0925128	0.157624	0.204911	0.173386	0.231282	0.0693846	0.157624	71	4
4	4	0.0527813	0.211125	0.208509	0.0834037	0.175938	0.228719	0.193531	0.208509	0.0625528	0.175938	71	6
4	5	0.0498923	0.199569	0.219489	0.0877957	0.166308	0.2162	0.182938	0.219489	0.0658467	0.166308	71	4
4	1	0.0428525	0.17141	0.257464	0.102986	0.142842	0.185694	0.157126	0.257464	0.0772392	0.142842	72	4
4	2	0.0449468	0.179787	0.243927	0.0975708	0.149823	0.194769	0.164805	0.243927	0.0731781	0.149823	72	5
4	3	0.0498923	0.199569	0.219489	0.0877957	0.166308	0.2162	0.182938	0.219489	0.0658467	0.166308	72	4
4	4	0.0449468	0.179787	0.243927	0.0975708	0.149823	0.194769	0.164805	0.243927	0.0731781	0.149823	72	6
4	5	0.0449468	0.179787	0.243927	0.0975708	0.149823	0.194769	0.164805	0.243927	0.0731781	0.149823	72	1
4	1	0.03	0.12	0.1	0.04	0.1	0.13	0.11	0.1	0.03	0.1	73	5
4	2	0.0300005	0.120002	0.151315	0.0605261	0.100002	0.130002	0.110002	0.151315	0.0453946	0.100002	73	4
4	3	0.0393312	0.157325	0.100796	0.0403185	0.131104	0.170435	0.144214	0.100796	0.0302389	0.131104	73	6
4	4	0.0300072	0.120029	0.140265	0.0561061	0.100024	0.130031	0.110026	0.140265	0.0420796	0.100024	73	5
4	5	0.0428525	0.17141	0.100384	0.0401536	0.142842	0.185694	0.157126	0.100384	0.0301152	0.142842	73	4
4	1	0.0300023	0.120009	0.145539	0.0582157	0.100008	0.13001	0.110008	0.145539	0.0436618	0.100008	74	6
4	2	0.0393312	0.157325	0.100796	0.0403185	0.131104	0.170435	0.144214	0.100796	0.0302389	0.131104	74	4
4	3	0.0300023	0.120009	0.145539	0.0582157	0.100008	0.13001	0.110008	0.145539	0.0436618	0.100008	74	3
4	4	0.0428525	0.17141	0.100384	0.0401536	0.142842	0.185694	0.157126	0.100384	0.0301152	0.142842	74	5
4	5	0.03	0.12	0.157624	0.0630496	0.1	0.13	0.11	0.157624	0.0472872	0.1	74	6
4	1	0.03	0.12	0.1	0.04	0.1	0.13	0.11	0.1	0.03	0.1	75	5
4	2	0.0300005	0.120002	0.157624	0.0630496	0.100002	0.130002	0.110002	0.157624	0.0472872	0.100002	75	1
4	3	0.0393312	0.157325	0.101097	0.0404387	0.131104	0.170435	0.144214	0.101097	0.030329	0.131104	75	3
4	4	0.0300072	0.120029	0.145539	0.0582157	0.100024	0.130031	0.110026	0.145539	0.0436618	0.100024	75	4
4	5	0.0428525	0.17141	0.100562	0.0402249	0.142842	0.185694	0.157126	0.100562	0.0301687	0.142842	75	5
4	1	0.0300023	0.120009	0.151315	0.0605261	0.100008	0.13001	0.110008	0.151315	0.0453946	0.100008	76	5
4	2	0.0393312	0.157325	0.101097	0.0404387	0.131104	0.170435	0.144214	0.101097	0.030329	0.131104	76	6
4	3	0.0300072	0.120029	0.145539	0.0582157	0.100024	0.130031	0.110026	0.145539	0.0436618	0.100024	76	2
4	4	0.0428525	0.17141	0.100562	0.0402249	0.142842	0.185694	0.157126	0.100562	0.0301687	0.142842	76	3
4	5	0.03	0.12	0.164497	0.0657989	0.1	0.13	0.11	0.164497	0.0493492	0.1	76	1
4	1	0.03	0.12	0.100001	0.0400002	0.1	0.13	0.11	0.100001	0.0300002	0.1	77	5
4	2	0.0300023	0.120009	0.157624	0.0630496	0.100008	0.13001	0.110008	0.157624	0.0472872	0.100008	77	5
4	3	0.0393312	0.157325	0.101475	0.0405901	0.131104	0.170435	0.144214	0.101475	0.0304426	0.131104	77	5
4	4	0.0300072	0.120029	0.151315	0.0605261	0.100024	0.130031	0.110026	0.151315	0.0453946	0.100024	77	6
4	5	0.0428525	0.17141	0.100796	0.0403185	0.142842	0.185694	0.157126	0.100796	0.0302389	0.142842	77	3
4	1	0.0300072	0.120029	0.151315	0.0605261	0.100024	0.130031	0.110026	0.151315	0.0453946	0.100024	78	6
4	2	0.0393312	0.157325	0.101475	0.0405901	0.131104	0.170435	0.144214	0.101475	0.0304426	0.131104	78	4
4	3	0.0300072	0.120029	0.151315	0.0605261	0.100024	0.130031	0.110026	0.151315	0.0453946	0.100024	78	4
4	4	0.0428525	0.17141	0.100796	0.0403185	0.142842	0.185694	0.157126	0.100796	0.0302389	0.142842	78	2
4	5	0.0300005	0.120002	0.164497	0.0657989	0.100002	0.130002	0.110002	0.164497	0.0493492	0.100002	78	6
4	1	0.03	0.12	0.100003	0.0400012	0.1	0.13	0.11	0.100003	0.0300009	0.1	79	6
4	2	0.0300023	0.120009	0.164497	0.0657989	0.100008	0.13001	0.110008	0.164497	0.0493492	0.100008	79	1
4	3	0.0393312	0.157325	0.101944	0.0407776	0.131104	0.170435	0.144214	0.101944	0.0305832	0.131104	79	5
4	4	0.0300072	0.120029	0.157624	0.0630496	0.100024	0.130031	0.110026	0.157624	0.0472872	0.100024	79	4
4	5	0.0428525	0.17141	0.101097	0.0404387	0.142842	0.185694	0.157126	0.101097	0.030329	0.142842	79	4
4	1	0.0300072	0.120029	0.157624	0.0630496	0.100024	0.130031	0.110026	0.157624	0.0472872	0.100024	80	1
4	2	0.0393312	0.157325	0.101944	0.0407776	0.131104	0.170435	0.144214	0.101944	0.0305832	0.131104	80	4
4	3	0.0300072	0.120029	0.157624	0.0630496	0.100024	0.130031	0.110026	0.157624	0.0472872	0.100024	80	5
4	4	0.0428525	0.17141	0.101097	0.0404387	0.142842	0.185694	0.157126	0.101097	0.030329	0.142842	80	6
4	5	0.0300005	0.120002	0.171968	0.0687871	0.100002	0.130002	0.110002	0.171968	0.0515903	0.100002	80	1
4	1	0.03	0.12	0.100003	0.0400012	0.1	0.13	0.11	0.100003	0.0300009	0.1	81	5
4	2	0.0300072	0.120029	0.164497	0.0657989	0.100024	0.130031	0.110026	0.164497	0.0493492	0.100024	81	6
4	3	0.0393312	0.157325	0.102517	0.0410066	0.131104	0.170435	0.144214	0.102517	0.030755	0.131104	81	4
4	4	0.0300176	0.12007	0.157624	0.0630496	0.100059	0.130076	0.110064	0.157624	0.0472872	0.100059	81	1
4	5	0.0428525	0.17141	0.101475	0.0405901	0.142842	0.185694	0.157126	0.101475	0.0304426	0.142842	81	6
4	1	0.0300176	0.12007	0.157624	0.0630496	0.100059	0.130076	0.110064	0.157624	0.0472872	0.100059	82	2
4	2	0.0393312	0.157325	0.102517	0.0410066	0.131104	0.170435	0.144214	0.102517	0.030755	0.131104	82	5
4	3	0.0300176	0.12007	0.157624	0.0630496	0.100059	0.130076	0.110064	0.157624	0.0472872	0.100059	82	3
4	4	0.0428525	0.17141	0.101475	0.0405901	0.142842	0.185694	0.157126	0.101475	0.0304426	0.142842	82	4
4	5	0.0300023	0.120009	0.171968	0.0687871	0.100008	0.13001	0.110008	0.171968	0.0515903	0.100008	82	1
4	1	0.03	0.12	0.10001	0.0400039	0.1	0.13	0.11	0.10001	0.0300029	0.1	83	5
4	2	0.0300176	0.12007	0.164497	0.0657989	0.100059	0.130076	0.110064	0.164497	0.0493492	0.100059	83	1
4	3	0.0393312	0.157325	0.103207	0.0412829	0.131104	0.170435	0.144214	0.103207	0.0309622	0.131104	83	6
4	4	0.0300365	0.120146	0.157624	0.0630496	0.100122	0.130158	0.110134	0.157624	0.0472872	0.100122	83	3
4	5	0.0428525	0.17141	0.101944	0.0407776	0.142842	0.185694	0.157126	0.101944	0.0305832	0.142842	83	5
4	1	0.0300176	0.12007	0.164497	0.0657989	0.100059	0.130076	0.110064	0.164497	0.0493492	0.100059	84	1
4	2	0.0393312	0.157325	0.103207	0.0412829	0.131104	0.170435	0.144214	0.103207	0.0309622	0.131104	84	2
4	3	0.0300365	0.120146	0.157624	0.0630496	0.100122	0.130158	0.110134	0.157624	0.0472872	0.100122	84	1
4	4	0.0428525	0.17141	0.101944	0.0407776	0.142842	0.185694	0.157126	0.101944	0.0305832	0.142842	84	4
4	5	0.0300072	0.120029	0.171968	0.0687871	0.100024	0.130031	0.110026	0.171968	0.0515903	0.100024	84	3
4	1	0.03	0.12	0.100024	0.0400096	0.1	0.13	0.11	0.100024	0.0300072	0.1	85	3
4	2	0.0300365	0.120146	0.164497	0.0657989	0.100122	0.130158	0.110134	0.164497	0.0493492	0.100122	85	1
4	3	0.0393312	0.157325	0.104031	0.0416124	0.131104	0.170435	0.144214	0.104031	0.0312093	0.131104	85	5
4	4	0.0300675	0.12027	0.157624	0.0630496	0.100225	0.130293	0.110248	0.157624	0.0472872	0.100225	85	4
4	5	0.0428525	0.17141	0.102517	0.0410066	0.142842	0.185694	0.157126	0.102517	0.030755	0.142842	85	2
4	1	0.0300365	0.120146	0.164497	0.0657989	0.100122	0.130158	0.110134	0.164497	0.0493492	0.100122	86	5
4	2	0.0393312	0.157325	0.104031	0.0416124	0.131104	0.170435	0.144214	0.104031	0.0312093	0.131104	86	4
4	3	0.0300675	0.12027	0.157624	0.0630496	0.100225	0.130293	0.110248	0.157624	0.0472872	0.100225	86	5
4	4	0.0428525	0.17141	0.102517	0.0410066	0.142842	0.185694	0.157126	0.102517	0.030755	0.142842	86	2
4	5	0.0300176	0.12007	0.171968	0.0687871	0.100059	0.130076	0.110064	0.171968	0.0515903	0.100059	86	5
4	1	0.03	0.12	0.10005	0.0400199	0.1	0.13	0.11	0.10005	0.0300149	0.1	87	5
4	2	0.0300675	0.12027	0.164497	0.0657989	0.100225	0.130293	0.110248	0.164497	0.0493492	0.100225	87	1
4	3	0.0393312	0.157325	0.105004	0.0420017	0.131104	0.170435	0.144214	0.105004	0.0315013	0.131104	87	6
4	4	0.0300675	0.12027	0.164497	0.0657989	0.100225	0.130293	0.110248	0.164497	0.0493492	0.100225	87	4
4	5	0.0428525	0.17141	0.103207	0.0412829	0.142842	0.185694	0.157126	0.103207	0.0309622	0.142842	87	4
4	1	0.0300365	0.120146	0.171968	0.0687871	0.100122	0.130158	0.110134	0.171968	0.0515903	0.100122	88	6
4	2	0.0393312	0.157325	0.105004	0.0420017	0.131104	0.170435	0.144214	0.105004	0.0315013	0.131104	88	5
4	3	0.0300675	0.12027	0.164497	0.0657989	0.100225	0.130293	0.110248	0.164497	0.0493492	0.100225	88	1
4	4	0.0428525	0.17141	0.103207	0.0412829	0.142842	0.185694	0.157126	0.103207	0.0309622	0.142842	88	4
4	5	0.0300365	0.120146	0.171968	0.0687871	0.100122	0.130158	0.110134	0.171968	0.0515903	0.100122	88	3
4	1	0.03	0.12	0.100092	0.0400369	0.1	0.13	0.11	0.100092	0.0300277	0.1	89	2
4	2	0.0301152	0.120461	0.164497	0.0657989	0.100384	0.130499	0.110422	0.164497	0.0493492	0.100384	89	5
4	3	0.0393312	0.157325	0.106144	0.0424576	0.131104	0.170435	0.144214	0.106144	0.0318432	0.131104	89	5
4	4	0.0300675	0.12027	0.171968	0.0687871	0.100225	0.130293	0.110248	0.171968	0.0515903	0.100225	89	1
4	5	0.0428525	0.17141	0.104031	0.0416124	0.142842	0.185694	0.157126	0.104031	0.0312093	0.142842	89	5
4	1	0.0300675	0.12027	0.171968	0.0687871	0.100225	0.130293	0.110248	0.171968	0.0515903	0.100225	90	6
4	2	0.0393312	0.157325	0.106144	0.0424576	0.131104	0.170435	0.144214	0.106144	0.0318432	0.131104	90	4
4	3	0.0301152	0.120461	0.164497	0.0657989	0.100384	0.130499	0.110422	0.164497	0.0493492	0.100384	90	6
4	4	0.0428525	0.17141	0.104031	0.0416124	0.142842	0.185694	0.157126	0.104031	0.0312093	0.142842	90	2
4	5	0.0300675	0.12027	0.171968	0.0687871	0.100225	0.130293	0.110248	0.171968	0.0515903	0.100225	90	1
4	1	0.03	0.12	0.100157	0.0400629	0.1	0.13	0.11	0.100157	0.0300472	0.1	91	5
4	2	0.0301845	0.120738	0.164497	0.0657989	0.100615	0.1308	0.110677	0.164497	0.0493492	0.100615	91	1
4	3	0.0393312	0.157325	0.107468	0.0429872	0.131104	0.170435	0.144214	0.107468	0.0322404	0.131104	91	2
4	4	0.0301152	0.120461	0.171968	0.0687871	0.100384	0.130499	0.110422	0.171968	0.0515903	0.100384	91	3
4	5	0.0428525	0.17141	0.105004	0.0420017	0.142842	0.185694	0.157126	0.105004	0.0315013	0.142842	91	4
4	1	0.0300675	0.12027	0.180069	0.0720277	0.100225	0.130293	0.110248	0.180069	0.0540208	0.100225	92	1
4	2	0.0393312	0.157325	0.107468	0.0429872	0.131104	0.170435	0.144214	0.107468	0.0322404	0.131104	92	2
4	3	0.0301845	0.120738	0.164497	0.0657989	0.100615	0.1308	0.110677	0.164497	0.0493492	0.100615	92	4
4	4	0.0428525	0.17141	0.105004	0.0420017	0.142842	0.185694	0.157126	0.105004	0.0315013	0.142842	92	3
4	5	0.0301152	0.120461	0.171968	0.0687871	0.100384	0.130499	0.110422	0.171968	0.0515903	0.100384	92	1
4	1	0.03	0.12	0.100252	0.0401008	0.1	0.13	0.11	0.100252	0.0300756	0.1	93	5
4	2	0.0302813	0.121125	0.164497	0.0657989	0.100938	0.131219	0.111031	0.164497	0.0493492	0.100938	93	5
4	3	0.0393312	0.157325	0.108995	0.0435982	0.131104	0.170435	0.144214	0.108995	0.0326986	0.131104	93	4
4	4	0.0301845	0.120738	0.171968	0.0687871	0.100615	0.1308	0.110677	0.171968	0.0515903	0.100615	93	1
4	5	0.0428525	0.17141	0.106144	0.0424576	0.142842	0.185694	0.157126	0.106144	0.0318432	0.142842	93	5
4	1	0.0301152	0.120461	0.180069	0.0720277	0.100384	0.130499	0.110422	0.180069	0.0540208	0.100384	94	6
4	2	0.0393312	0.157325	0.108995	0.0435982	0.131104	0.170435	0.144214	0.108995	0.0326986	0.131104	94	4
4	3	0.0302813	0.121125	0.164497	0.0657989	0.100938	0.131219	0.111031	0.164497	0.0493492	0.100938	94	1
4	4	0.0428525	0.17141	0.106144	0.0424576	0.142842	0.185694	0.157126	0.106144	0.0318432	0.142842	94	5
4	5	0.0301845	0.120738	0.171968	0.0687871	0.100615	0.1308	0.110677	0.171968	0.0515903	0.100615	94	3
4	1	0.03	0.12	0.100384	0.0401536	0.1	0.13	0.11	0.100384	0.0301152	0.1	95	4
4	2	0.0304118	0.121647	0.164497	0.0657989	0.101373	0.131784	0.11151	0.164497	0.0493492	0.101373	95	1
4	3	0.0393312	0.157325	0.110746	0.0442984	0.131104	0.170435	0.144214	0.110746	0.0332238	0.131104	95	2
4	4	0.0302813	0.121125	0.171968	0.0687871	0.100938	0.131219	0.111031	0.171968	0.0515903	0.100938	95	4
4	5	0.0428525	0.17141	0.107468	0.0429872	0.142842	0.185694	0.157126	0.107468	0.0322404	0.142842	95	5
4	1	0.0301845	0.120738	0.180069	0.0720277	0.100615	0.1308	0.110677	0.180069	0.0540208	0.100615	96	1
4	2	0.0393312	0.157325	0.110746	0.0442984	0.131104	0.170435	0.144214	0.110746	0.0332238	0.131104	96	4
4	3	0.0304118	0.121647	0.164497	0.0657989	0.101373	0.131784	0.11151	0.164497	0.0493492	0.101373	96	5
4	4	0.0428525	0.17141	0.107468	0.0429872	0.142842	0.185694	0.157126	0.107468	0.0322404	0.142842	96	4
4	5	0.0302813	0.121125	0.171968	0.0687871	0.100938	0.131219	0.111031	0.171968	0.0515903	0.100938	96	1
4	1	0.03	0.12	0.100562	0.0402249	0.1	0.13	0.11	0.100562	0.0301687	0.1	97	5
4	2	0.0305832	0.122333	0.164497	0.0657989	0.101944	0.132527	0.112138	0.164497	0.0493492	0.101944	97	6
4	3	0.0393312	0.157325	0.11274	0.0450961	0.131104	0.170435	0.144214	0.11274	0.0338221	0.131104	97	3
4	4	0.0304118	0.121647	0.171968	0.0687871	0.101373	0.131784	0.11151	0.171968	0.0515903	0.101373	97	1
4	5	0.0428525	0.17141	0.108995	0.0435982	0.142842	0.185694	0.157126	0.108995	0.0326986	0.142842	97	1
4	1	0.0302813	0.121125	0.180069	0.0720277	0.100938	0.131219	0.111031	0.180069	0.0540208	0.100938	98	1
4	2	0.0393312	0.157325	0.11274	0.0450961	0.131104	0.170435	0.144214	0.11274	0.0338221	0.131104	98	4
4	3	0.0305832	0.122333	0.164497	0.0657989	0.101944	0.132527	0.112138	0.164497	0.0493492	0.101944	98	3
4	4	0.0428525	0.17141	0.108995	0.0435982	0.142842	0.185694	0.157126	0.108995	0.0326986	0.142842	98	5
4	5	0.0304118	0.121647	0.171968	0.0687871	0.101373	0.131784	0.11151	0.171968	0.0515903	0.101373	98	1
4	1	0.03	0.12	0.100796	0.0403185	0.1	0.13	0.11	0.100796	0.0302389	0.1	99	4
4	2	0.0308033	0.123213	0.164497	0.0657989	0.102678	0.133481	0.112945	0.164497	0.0493492	0.102678	99	4
4	3	0.0393312	0.157325	0.115	0.046	0.131104	0.170435	0.144214	0.115	0.0345	0.131104	99	5
4	4	0.0305832	0.122333	0.171968	0.0687871	0.101944	0.132527	0.112138	0.171968	0.0515903	0.101944	99	1
4	5	0.0428525	0.17141	0.110746	0.0442984	0.142842	0.185694	0.157126	0.110746	0.0332238	0.142842	99	2
4	1	0.0304118	0.121647	0.180069	0.0720277	0.101373	0.131784	0.11151	0.180069	0.0540208	0.101373	100	5
4	2	0.0393312	0.157325	0.115	0.046	0.131104	0.170435	0.144214	0.115	0.0345	0.131104	100	4
4	3	0.0308033	0.123213	0.164497	0.0657989	0.102678	0.133481	0.112945	0.164497	0.0493492	0.102678	100	1
4	4	0.0428525	0.17141	0.110746	0.0442984	0.142842	0.185694	0.157126	0.110746	0.0332238	0.142842	100	5
4	5	0.0305832	0.122333	0.171968	0.0687871	0.101944	0.132527	0.112138	0.171968	0.0515903	0.101944	100	6
4	1	0.03	0.12	0.101097	0.0404387	0.1	0.13	0.11	0.101097	0.030329	0.1	101	4
4	2	0.0310805	0.124322	0.164497	0.0657989	0.103602	0.134682	0.113962	0.164497	0.0493492	0.103602	101	1
4	3	0.0393312	0.157325	0.117548	0.0470192	0.131104	0.170435	0.144214	0.117548	0.0352644	0.131104	101	5
4	4	0.0308033	0.123213	0.171968	0.0687871	0.102678	0.133481	0.112945	0.171968	0.0515903	0.102678	101	1
4	5	0.0428525	0.17141	0.11274	0.0450961	0.142842	0.185694	0.157126	0.11274	0.0338221	0.142842	101	4
4	1	0.0305832	0.122333	0.180069	0.0720277	0.101944	0.132527	0.112138	0.180069	0.0540208	0.101944	102	3
4	2	0.0393312	0.157325	0.117548	0.0470192	0.131104	0.170435	0.144214	0.117548	0.0352644	0.131104	102	5
4	3	0.0310805	0.124322	0.164497	0.0657989	0.103602	0.134682	0.113962	0.164497	0.0493492	0.103602	102	1
4	4	0.0428525	0.17141	0.11274	0.0450961	0.142842	0.185694	0.157126	0.11274	0.0338221	0.142842	102	5
4	5	0.0308033	0.123213	0.171968	0.0687871	0.102678	0.133481	0.112945	0.171968	0.0515903	0.102678	102	4
4	1	0.03	0.12	0.101475	0.0405901	0.1	0.13	0.11	0.101475	0.0304426	0.1	103	1
4	2	0.0314238	0.125695	0.164497	0.0657989	0.104746	0.13617	0.115221	0.164497	0.0493492	0.104746	103	5
4	3	0.0393312	0.157325	0.120407	0.0481629	0.131104	0.170435	0.144214	0.120407	0.0361222	0.131104	103	4
4	4	0.0310805	0.124322	0.171968	0.0687871	0.103602	0.134682	0.113962	0.171968	0.0515903	0.103602	103	1
4	5	0.0428525	0.17141	0.115	0.046	0.142842	0.185694	0.157126	0.115	0.0345	0.142842	103	1
4	1	0.0308033	0.123213	0.180069	0.0720277	0.102678	0.133481	0.112945	0.180069	0.0540208	0.102678	104	6
4	2	0.0393312	0.157325	0.120407	0.0481629	0.131104	0.170435	0.144214	0.120407	0.0361222	0.131104	104	1
4	3	0.0314238	0.125695	0.164497	0.0657989	0.104746	0.13617	0.115221	0.164497	0.0493492	0.104746	104	3
4	4	0.0428525	0.17141	0.115	0.046	0.142842	0.185694	0.157126	0.115	0.0345	0.142842	104	1
4	5	0.0310805	0.124322	0.171968	0.0687871	0.103602	0.134682	0.113962	0.171968	0.0515903	0.103602	104	4
4	1	0.0300005	0.120002	0.101475	0.0405901	0.100002	0.130002	0.110002	0.101475	0.0304426	0.100002	105	6
4	2	0.0318432	0.127373	0.164497	0.0657989	0.106144	0.137987	0.116758	0.164497	0.0493492	0.106144	105	1
4	3	0.0393312	0.157325	0.123603	0.0494411	0.131104	0.170435	0.144214	0.123603	0.0370808	0.131104	105	2
4	4	0.0314238	0.125695	0.171968	0.0687871	0.104746	0.13617	0.115221	0.171968	0.0515903	0.104746	105	1
4	5	0.0449468	0.179787	0.115	0.046	0.149823	0.194769	0.164805	0.115	0.0345	0.149823	105	4
4	1	0.0310805	0.124322	0.180069	0.0720277	0.103602	0.134682	0.113962	0.180069	0.0540208	0.103602	106	5
4	2	0.0409863	0.163945	0.120407	0.0481629	0.136621	0.177607	0.150283	0.120407	0.0361222	0.136621	106	4
4	3	0.0318432	0.127373	0.164497	0.0657989	0.106144	0.137987	0.116758	0.164497	0.0493492	0.106144	106	1
4	4	0.0449468	0.179787	0.115	0.046	0.149823	0.194769	0.164805	0.115	0.0345	0.149823	106	2
4	5	0.0314238	0.125695	0.171968	0.0687871	0.104746	0.13617	0.115221	0.171968	0.0515903	0.104746	106	5
4	1	0.0300005	0.120002	0.101944	0.0407776	0.100002	0.130002	0.110002	0.101944	0.0305832	0.100002	107	2
4	2	0.032349	0.129396	0.164497	0.0657989	0.10783	0.140179	0.118613	0.164497	0.0493492	0.10783	107	5
4	3	0.0393312	0.157325	0.12716	0.0508638	0.131104	0.170435	0.144214	0.12716	0.0381479	0.131104	107	6
4	4	0.0318432	0.127373	0.171968	0.0687871	0.106144	0.137987	0.116758	0.171968	0.0515903	0.106144	107	4
4	5	0.0449468	0.179787	0.117548	0.0470192	0.149823	0.194769	0.164805	0.117548	0.0352644	0.149823	107	5
4	1	0.0314238	0.125695	0.180069	0.0720277	0.104746	0.13617	0.115221	0.180069	0.0540208	0.104746	108	4
4	2	0.0409863	0.163945	0.123603	0.0494411	0.136621	0.177607	0.150283	0.123603	0.0370808	0.136621	108	5
4	3	0.032349	0.129396	0.164497	0.0657989	0.10783	0.140179	0.118613	0.164497	0.0493492	0.10783	108	5
4	4	0.0449468	0.179787	0.117548	0.0470192	0.149823	0.194769	0.164805	0.117548	0.0352644	0.149823	108	6
4	5	0.0314238	0.125695	0.180069	0.0720277	0.104746	0.13617	0.115221	0.180069	0.0540208	0.104746	108	5
4	1	0.0300005	0.120002	0.102517	0.0410066	0.100002	0.130002	0.110002	0.102517	0.030755	0.100002	109	4
4	2	0.032349	0.129396	0.171968	0.0687871	0.10783	0.140179	0.118613	0.171968	0.0515903	0.10783	109	2
4	3	0.0393312	0.157325	0.131104	0.0524416	0.131104	0.170435	0.144214	0.131104	0.0393312	0.131104	109	4
4	4	0.0318432	0.127373	0.180069	0.0720277	0.106144	0.137987	0.116758	0.180069	0.0540208	0.106144	109	2
4	5	0.0449468	0.179787	0.120407	0.0481629	0.149823	0.194769	0.164805	0.120407	0.0361222	0.149823	109	5
4	1	0.0314238	0.125695	0.188836	0.0755345	0.104746	0.13617	0.115221	0.188836	0.0566508	0.104746	110	6
4	2	0.0409863	0.163945	0.12716	0.0508638	0.136621	0.177607	0.150283	0.12716	0.0381479	0.136621	110	4
4	3	0.032349	0.129396	0.171968	0.0687871	0.10783	0.140179	0.118613	0.171968	0.0515903	0.10783	110	1
4	4	0.0449468	0.179787	0.120407	0.0481629	0.149823	0.194769	0.164805	0.120407	0.0361222	0.149823	110	4
4	5	0.0314238	0.125695	0.188836	0.0755345	0.104746	0.13617	0.115221	0.188836	0.0566508	0.104746	110	5
4	1	0.0300005	0.120002	0.103207	0.0412829	0.100002	0.130002	0.110002	0.103207	0.0309622	0.100002	111	4
4	2	0.032349	0.129396	0.180069	0.0720277	0.10783	0.140179	0.118613	0.180069	0.0540208	0.10783	111	5
4	3	0.0393312	0.157325	0.135463	0.0541853	0.131104	0.170435	0.144214	0.135463	0.040639	0.131104	111	6
4	4	0.0318432	0.127373	0.188836	0.0755345	0.106144	0.137987	0.116758	0.188836	0.0566508	0.106144	111	1
4	5	0.0449468	0.179787	0.123603	0.0494411	0.149823	0.194769	0.164805	0.123603	0.0370808	0.149823	111	5
4	1	0.0318432	0.127373	0.188836	0.0755345	0.106144	0.137987	0.116758	0.188836	0.0566508	0.106144	112	1
4	2	0.0409863	0.163945	0.131104	0.0524416	0.136621	0.177607	0.150283	0.131104	0.0393312	0.136621	112	4
4	3	0.0329525	0.13181	0.171968	0.0687871	0.109842	0.142794	0.120826	0.171968	0.0515903	0.109842	112	6
4	4	0.0449468	0.179787	0.123603	0.0494411	0.149823	0.194769	0.164805	0.123603	0.0370808	0.149823	112	2
4	5	0.0314238	0.125695	0.198304	0.0793216	0.104746	0.13617	0.115221	0.198304	0.0594912	0.104746	112	1
4	1	0.0300005	0.120002	0.104031	0.0416124	0.100002	0.130002	0.110002	0.104031	0.0312093	0.100002	113	5
4	2	0.0329525	0.13181	0.180069	0.0720277	0.109842	0.142794	0.120826	0.180069	0.0540208	0.109842	113	4
4	3	0.0393312	0.157325	0.140265	0.0561061	0.131104	0.170435	0.144214	0.140265	0.0420796	0.131104	113	4
4	4	0.032349	0.129396	0.188836	0.0755345	0.10783	0.140179	0.118613	0.188836	0.0566508	0.10783	113	1
4	5	0.0449468	0.179787	0.12716	0.0508638	0.149823	0.194769	0.164805	0.12716	0.0381479	0.149823	113	5
4	1	0.032349	0.129396	0.188836	0.0755345	0.10783	0.140179	0.118613	0.188836	0.0566508	0.10783	114	6
4	2	0.0409863	0.163945	0.135463	0.0541853	0.136621	0.177607	0.150283	0.135463	0.040639	0.136621	114	5
4	3	0.0336653	0.134661	0.171968	0.0687871	0.112218	0.145883	0.123439	0.171968	0.0515903	0.112218	114	1
4	4	0.0449468	0.179787	0.12716	0.0508638	0.149823	0.194769	0.164805	0.12716	0.0381479	0.149823	114	4
4	5	0.0318432	0.127373	0.198304	0.0793216	0.106144	0.137987	0.116758	0.198304	0.0594912	0.106144	114	1
4	1	0.0300005	0.120002	0.105004	0.0420017	0.100002	0.130002	0.110002	0.105004	0.0315013	0.100002	115	6
4	2	0.0336653	0.134661	0.180069	0.0720277	0.112218	0.145883	0.123439	0.180069	0.0540208	0.112218	115	3
4	3	0.0393312	0.157325	0.145539	0.0582157	0.131104	0.170435	0.144214	0.145539	0.0436618	0.131104	115	5
4	4	0.0329525	0.13181	0.188836	0.0755345	0.109842	0.142794	0.120826	0.188836	0.0566508	0.109842	115	1
4	5	0.0449468	0.179787	0.131104	0.0524416	0.149823	0.194769	0.164805	0.131104	0.0393312	0.149823	115	1
4	1	0.0329525	0.13181	0.188836	0.0755345	0.109842	0.142794	0.120826	0.188836	0.0566508	0.109842	116	5
4	2	0.0409863	0.163945	0.140265	0.0561061	0.136621	0.177607	0.150283	0.140265	0.0420796	0.136621	116	4
4	3	0.0345	0.138	0.171968	0.0687871	0.115	0.1495	0.1265	0.171968	0.0515903	0.115	116	1
4	4	0.0449468	0.179787	0.131104	0.0524416	0.149823	0.194769	0.164805	0.131104	0.0393312	0.149823	116	2
4	5	0.032349	0.129396	0.198304	0.0793216	0.10783	0.140179	0.118613	0.198304	0.0594912	0.10783	116	4
4	1	0.0300005	0.120002	0.106144	0.0424576	0.100002	0.130002	0.110002	0.106144	0.0318432	0.100002	117	5
4	2	0.0345	0.138	0.180069	0.0720277	0.115	0.1495	0.1265	0.180069	0.0540208	0.115	117	1
4	3	0.0393312	0.157325	0.151315	0.0605261	0.131104	0.170435	0.144214	0.151315	0.0453946	0.131104	117	3
4	4	0.0336653	0.134661	0.188836	0.0755345	0.112218	0.145883	0.123439	0.188836	0.0566508	0.112218	117	1
4	5	0.0472872	0.189149	0.131104	0.0524416	0.157624	0.204911	0.173386	0.131104	0.0393312	0.157624	117	1
4	1	0.0336653	0.134661	0.188836	0.0755345	0.112218	0.145883	0.123439	0.188836	0.0566508	0.112218	118	3
4	2	0.0409863	0.163945	0.145539	0.0582157	0.136621	0.177607	0.150283	0.145539	0.0436618	0.136621	118	4
4	3	0.0354698	0.141879	0.171968	0.0687871	0.118233	0.153702	0.130056	0.171968	0.0515903	0.118233	118	1
4	4	0.0449468	0.179787	0.135463	0.0541853	0.149823	0.194769	0.164805	0.135463	0.040639	0.149823	118	5
4	5	0.0329525	0.13181	0.198304	0.0793216	0.109842	0.142794	0.120826	0.198304	0.0594912	0.109842	118	1
4	1	0.0300005	0.120002	0.107468	0.0429872	0.100002	0.130002	0.110002	0.107468	0.0322404	0.100002	119	4
4	2	0.0354698	0.141879	0.180069	0.0720277	0.118233	0.153702	0.130056	0.180069	0.0540208	0.118233	119	1
4	3	0.0409863	0.163945	0.151315	0.0605261	0.136621	0.177607	0.150283	0.151315	0.0453946	0.136621	119	2
4	4	0.0345	0.138	0.188836	0.0755345	0.115	0.1495	0.1265	0.188836	0.0566508	0.115	119	3
4	5	0.0498923	0.199569	0.131104	0.0524416	0.166308	0.2162	0.182938	0.131104	0.0393312	0.166308	119	5
4	1	0.0345	0.138	0.188836	0.0755345	0.115	0.1495	0.1265	0.188836	0.0566508	0.115	120	3
4	2	0.0409863	0.163945	0.151315	0.0605261	0.136621	0.177607	0.150283	0.151315	0.0453946	0.136621	120	4
4	3	0.0365885	0.146354	0.171968	0.0687871	0.121962	0.15855	0.134158	0.171968	0.0515903	0.121962	120	5
4	4	0.0449468	0.179787	0.140265	0.0561061	0.149823	0.194769	0.164805	0.140265	0.0420796	0.149823	120	6
4	5	0.0336653	0.134661	0.198304	0.0793216	0.112218	0.145883	0.123439	0.198304	0.0594912	0.112218	120	1
4	1	0.0300005	0.120002	0.108995	0.0435982	0.100002	0.130002	0.110002	0.108995	0.0326986	0.100002	121	4
4	2	0.0365885	0.146354	0.180069	0.0720277	0.121962	0.15855	0.134158	0.180069	0.0540208	0.121962	121	4
4	3	0.0409863	0.163945	0.157624	0.0630496	0.136621	0.177607	0.150283	0.157624	0.0472872	0.136621	121	4
4	4	0.0354698	0.141879	0.188836	0.0755345	0.118233	0.153702	0.130056	0.188836	0.0566508	0.118233	121	1
4	5	0.0498923	0.199569	0.135463	0.0541853	0.166308	0.2162	0.182938	0.135463	0.040639	0.166308	121	5
4	1	0.0354698	0.141879	0.188836	0.0755345	0.118233	0.153702	0.130056	0.188836	0.0566508	0.118233	122	3
4	2	0.0409863	0.163945	0.157624	0.0630496	0.136621	0.177607	0.150283	0.157624	0.0472872	0.136621	122	5
4	3	0.0365885	0.146354	0.180069	0.0720277	0.121962	0.15855	0.134158	0.180069	0.0540208	0.121962	122	2
4	4	0.0449468	0.179787	0.145539	0.0582157	0.149823	0.194769	0.164805	0.145539	0.0436618	0.149823	122	5
4	5	0.0345	0.138	0.198304	0.0793216	0.115	0.1495	0.1265	0.198304	0.0594912	0.115	122	1
4	1	0.0300005	0.120002	0.110746	0.0442984	0.100002	0.130002	0.110002	0.110746	0.0332238	0.100002	123	5
4	2	0.0365885	0.146354	0.188836	0.0755345	0.121962	0.15855	0.134158	0.188836	0.0566508	0.121962	123	3
4	3	0.0409863	0.163945	0.164497	0.0657989	0.136621	0.177607	0.150283	0.164497	0.0493492	0.136621	123	5
4	4	0.0365885	0.146354	0.188836	0.0755345	0.121962	0.15855	0.134158	0.188836	0.0566508	0.121962	123	5
4	5	0.0498923	0.199569	0.140265	0.0561061	0.166308	0.2162	0.182938	0.140265	0.0420796	0.166308	123	5
4	1	0.0365885	0.146354	0.188836	0.0755345	0.121962	0.15855	0.134158	0.188836	0.0566508	0.121962	124	1
4	2	0.0409863	0.163945	0.164497	0.0657989	0.136621	0.177607	0.150283	0.164497	0.0493492	0.136621	124	5
4	3	0.0365885	0.146354	0.188836	0.0755345	0.121962	0.15855	0.134158	0.188836	0.0566508	0.121962	124	6
4	4	0.0449468	0.179787	0.151315	0.0605261	0.149823	0.194769	0.164805	0.151315	0.0453946	0.149823	124	2
4	5	0.0354698	0.141879	0.198304	0.0793216	0.118233	0.153702	0.130056	0.198304	0.0594912	0.118233	124	3
4	1	0.0300005	0.120002	0.11274	0.0450961	0.100002	0.130002	0.110002	0.11274	0.0338221	0.100002	125	5
4	2	0.0378705	0.151482	0.188836	0.0755345	0.126235	0.164106	0.138859	0.188836	0.0566508	0.126235	125	4
4	3	0.0409863	0.163945	0.171968	0.0687871	0.136621	0.177607	0.150283	0.171968	0.0515903	0.136621	125	2
4	4	0.0378705	0.151482	0.188836	0.0755345	0.126235	0.164106	0.138859	0.188836	0.0566508	0.126235	125	1
4	5	0.0498923	0.199569	0.145539	0.0582157	0.166308	0.2162	0.182938	0.145539	0.0436618	0.166308	125	5
4	1	0.0378705	0.151482	0.188836	0.0755345	0.126235	0.164106	0.138859	0.188836	0.0566508	0.126235	126	4
4	2	0.0409863	0.163945	0.171968	0.0687871	0.136621	0.177607	0.150283	0.171968	0.0515903	0.136621	126	4
4	3	0.0378705	0.151482	0.188836	0.0755345	0.126235	0.164106	0.138859	0.188836	0.0566508	0.126235	126	5
4	4	0.0449468	0.179787	0.157624	0.0630496	0.149823	0.194769	0.164805	0.157624	0.0472872	0.149823	126	6
4	5	0.0365885	0.146354	0.198304	0.0793216	0.121962	0.15855	0.134158	0.198304	0.0594912	0.121962	126	1
4	1	0.0300005	0.120002	0.115	0.046	0.100002	0.130002	0.110002	0.115	0.0345	0.100002	127	5
4	2	0.0378705	0.151482	0.198304	0.0793216	0.126235	0.164106	0.138859	0.198304	0.0594912	0.126235	127	5
4	3	0.0409863	0.163945	0.180069	0.0720277	0.136621	0.177607	0.150283	0.180069	0.0540208	0.136621	127	5
4	4	0.0393312	0.157325	0.188836	0.0755345	0.131104	0.170435	0.144214	0.188836	0.0566508	0.131104	127	6
4	5	0.0498923	0.199569	0.151315	0.0605261	0.166308	0.2162	0.182938	0.151315	0.0453946	0.166308	127	5
4	1	0.0393312	0.157325	0.188836	0.0755345	0.131104	0.170435	0.144214	0.188836	0.0566508	0.131104	128	5
4	2	0.0409863	0.163945	0.180069	0.0720277	0.136621	0.177607	0.150283	0.180069	0.0540208	0.136621	128	6
4	3	0.0378705	0.151482	0.198304	0.0793216	0.126235	0.164106	0.138859	0.198304	0.0594912	0.126235	128	1
4	4	0.0449468	0.179787	0.164497	0.0657989	0.149823	0.194769	0.164805	0.164497	0.0493492	0.149823	128	5
4	5	0.0378705	0.151482	0.198304	0.0793216	0.126235	0.164106	0.138859	0.198304	0.0594912	0.126235	128	6
4	1	0.0300005	0.120002	0.117548	0.0470192	0.100002	0.130002	0.110002	0.117548	0.0352644	0.100002	129	4
4	2	0.0378705	0.151482	0.208509	0.0834037	0.126235	0.164106	0.138859	0.208509	0.0625528	0.126235	129	5
4	3	0.0428525	0.17141	0.180069	0.0720277	0.142842	0.185694	0.157126	0.180069	0.0540208	0.142842	129	3
4	4	0.0393312	0.157325	0.198304	0.0793216	0.131104	0.170435	0.144214	0.198304	0.0594912	0.131104	129	5
4	5	0.0498923	0.199569	0.157624	0.0630496	0.166308	0.2162	0.182938	0.157624	0.0472872	0.166308	129	5
4	1	0.0393312	0.157325	0.198304	0.0793216	0.131104	0.170435	0.144214	0.198304	0.0594912	0.131104	130	1
4	2	0.0409863	0.163945	0.188836	0.0755345	0.136621	0.177607	0.150283	0.188836	0.0566508	0.136621	130	5
4	3	0.0393312	0.157325	0.198304	0.0793216	0.131104	0.170435	0.144214	0.198304	0.0594912	0.131104	130	1
4	4	0.0449468	0.179787	0.171968	0.0687871	0.149823	0.194769	0.164805	0.171968	0.0515903	0.149823	130	2
4	5	0.0393312	0.157325	0.198304	0.0793216	0.131104	0.170435	0.144214	0.198304	0.0594912	0.131104	130	6
4	1	0.0300005	0.120002	0.120407	0.0481629	0.100002	0.130002	0.110002	0.120407	0.0361222	0.100002	131	6
4	2	0.0378705	0.151482	0.219489	0.0877957	0.126235	0.164106	0.138859	0.219489	0.0658467	0.126235	131	3
4	3	0.0449468	0.179787	0.180069	0.0720277	0.149823	0.194769	0.164805	0.180069	0.0540208	0.149823	131	4
4	4	0.0393312	0.157325	0.208509	0.0834037	0.131104	0.170435	0.144214	0.208509	0.0625528	0.131104	131	4
4	5	0.0498923	0.199569	0.164497	0.0657989	0.166308	0.2162	0.182938	0.164497	0.0493492	0.166308	131	4
4	1	0.0409863	0.163945	0.198304	0.0793216	0.136621	0.177607	0.150283	0.198304	0.0594912	0.136621	132	5
4	2	0.0428525	0.17141	0.188836	0.0755345	0.142842	0.185694	0.157126	0.188836	0.0566508	0.142842	132	4
4	3	0.0409863	0.163945	0.198304	0.0793216	0.136621	0.177607	0.150283	0.198304	0.0594912	0.136621	132	5
4	4	0.0449468	0.179787	0.180069	0.0720277	0.149823	0.194769	0.164805	0.180069	0.0540208	0.149823	132	4
4	5	0.0409863	0.163945	0.198304	0.0793216	0.136621	0.177607	0.150283	0.198304	0.0594912	0.136621	132	4
4	1	0.0300005	0.120002	0.123603	0.0494411	0.100002	0.130002	0.110002	0.123603	0.0370808	0.100002	133	5
4	2	0.0393312	0.157325	0.219489	0.0877957	0.131104	0.170435	0.144214	0.219489	0.0658467	0.131104	133	3
4	3	0.0449468	0.179787	0.188836	0.0755345	0.149823	0.194769	0.164805	0.188836	0.0566508	0.149823	133	4
4	4	0.0409863	0.163945	0.208509	0.0834037	0.136621	0.177607	0.150283	0.208509	0.0625528	0.136621	133	1
4	5	0.0498923	0.199569	0.171968	0.0687871	0.166308	0.2162	0.182938	0.171968	0.0515903	0.166308	133	2
4	1	0.0409863	0.163945	0.208509	0.0834037	0.136621	0.177607	0.150283	0.208509	0.0625528	0.136621	134	6
4	2	0.0428525	0.17141	0.198304	0.0793216	0.142842	0.185694	0.157126	0.198304	0.0594912	0.142842	134	3
4	3	0.0409863	0.163945	0.208509	0.0834037	0.136621	0.177607	0.150283	0.208509	0.0625528	0.136621	134	1
4	4	0.0449468	0.179787	0.188836	0.0755345	0.149823	0.194769	0.164805	0.188836	0.0566508	0.149823	134	2
4	5	0.0409863	0.163945	0.208509	0.0834037	0.136621	0.177607	0.150283	0.208509	0.0625528	0.136621	134	5
4	1	0.0300005	0.120002	0.12716	0.0508638	0.100002	0.130002	0.110002	0.12716	0.0381479	0.100002	135	5
4	2	0.0409863	0.163945	0.219489	0.0877957	0.136621	0.177607	0.150283	0.219489	0.0658467	0.136621	135	1
4	3	0.0449468	0.179787	0.198304	0.0793216	0.149823	0.194769	0.164805	0.198304	0.0594912	0.149823	135	2
4	4	0.0428525	0.17141	0.208509	0.0834037	0.142842	0.185694	0.157126	0.208509	0.0625528	0.142842	135	3
4	5	0.0498923	0.199569	0.180069	0.0720277	0.166308	0.2162	0.182938	0.180069	0.0540208	0.166308	135	2
4	1	0.0409863	0.163945	0.219489	0.0877957	0.136621	0.177607	0.150283	0.219489	0.0658467	0.136621	136	2
4	2	0.0428525	0.17141	0.208509	0.0834037	0.142842	0.185694	0.157126	0.208509	0.0625528	0.142842	136	5
4	3	0.0428525	0.17141	0.208509	0.0834037	0.142842	0.185694	0.157126	0.208509	0.0625528	0.142842	136	5
4	4	0.0449468	0.179787	0.198304	0.0793216	0.149823	0.194769	0.164805	0.198304	0.0594912	0.149823	136	5
4	5	0.0428525	0.17141	0.208509	0.0834037	0.142842	0.185694	0.157126	0.208509	0.0625528	0.142842	136	4
4	1	0.0300005	0.120002	0.131104	0.0524416	0.100002	0.130002	0.110002	0.131104	0.0393312	0.100002	137	5
4	2	0.0428525	0.17141	0.219489	0.0877957	0.142842	0.185694	0.157126	0.219489	0.0658467	0.142842	137	2
4	3	0.0449468	0.179787	0.208509	0.0834037	0.149823	0.194769	0.164805	0.208509	0.0625528	0.149823	137	4
4	4	0.0449468	0.179787	0.208509	0.0834037	0.149823	0.194769	0.164805	0.208509	0.0625528	0.149823	137	1
4	5	0.0498923	0.199569	0.188836	0.0755345	0.166308	0.2162	0.182938	0.188836	0.0566508	0.166308	137	5
4	1	0.0409863	0.163945	0.231282	0.0925128	0.136621	0.177607	0.150283	0.231282	0.0693846	0.136621	138	1
4	2	0.0428525	0.17141	0.219489	0.0877957	0.142842	0.185694	0.157126	0.219489	0.0658467	0.142842	138	3
4	3	0.0449468	0.179787	0.208509	0.0834037	0.149823	0.194769	0.164805	0.208509	0.0625528	0.149823	138	1
4	4	0.0449468	0.179787	0.208509	0.0834037	0.149823	0.194769	0.164805	0.208509	0.0625528	0.149823	138	2
4	5	0.0428525	0.17141	0.219489	0.0877957	0.142842	0.185694	0.157126	0.219489	0.0658467	0.142842	138	5
4	1	0.0300005	0.120002	0.135463	0.0541853	0.100002	0.130002	0.110002	0.135463	0.040639	0.100002	139	3
4	2	0.0428525	0.17141	0.231282	0.0925128	0.142842	0.185694	0.157126	0.231282	0.0693846	0.142842	139	4
4	3	0.0449468	0.179787	0.219489	0.0877957	0.149823	0.194769	0.164805	0.219489	0.0658467	0.149823	139	1
4	4	0.0472872	0.189149	0.208509	0.0834037	0.157624	0.204911	0.173386	0.208509	0.0625528	0.157624	139	3
4	5	0.0498923	0.199569	0.198304	0.0793216	0.166308	0.2162	0.182938	0.198304	0.0594912	0.166308	139	2
4	1	0.0428525	0.17141	0.231282	0.0925128	0.142842	0.185694	0.157126	0.231282	0.0693846	0.142842	140	5
4	2	0.0449468	0.179787	0.219489	0.0877957	0.149823	0.194769	0.164805	0.219489	0.0658467	0.149823	140	2
4	3	0.0472872	0.189149	0.208509	0.0834037	0.157624	0.204911	0.173386	0.208509	0.0625528	0.157624	140	6
4	4	0.0449468	0.179787	0.219489	0.0877957	0.149823	0.194769	0.164805	0.219489	0.0658467	0.149823	140	6
4	5	0.0428525	0.17141	0.231282	0.0925128	0.142842	0.185694	0.157126	0.231282	0.0693846	0.142842	140	2
4	1	0.0300005	0.120002	0.140265	0.0561061	0.100002	0.130002	0.110002	0.140265	0.0420796	0.100002	141	4
4	2	0.0428525	0.17141	0.243927	0.0975708	0.142842	0.185694	0.157126	0.243927	0.0731781	0.142842	141	2
4	3	0.0472872	0.189149	0.219489	0.0877957	0.157624	0.204911	0.173386	0.219489	0.0658467	0.157624	141	5
4	4	0.0498923	0.199569	0.208509	0.0834037	0.166308	0.2162	0.182938	0.208509	0.0625528	0.166308	141	1
4	5	0.0498923	0.199569	0.208509	0.0834037	0.166308	0.2162	0.182938	0.208509	0.0625528	0.166308	141	2
4	1	0.0428525	0.17141	0.243927	0.0975708	0.142842	0.185694	0.157126	0.243927	0.0731781	0.142842	142	6
4	2	0.0449468	0.179787	0.231282	0.0925128	0.149823	0.194769	0.164805	0.231282	0.0693846	0.149823	142	2
4	3	0.0472872	0.189149	0.219489	0.0877957	0.157624	0.204911	0.173386	0.219489	0.0658467	0.157624	142	3
4	4	0.0449468	0.179787	0.231282	0.0925128	0.149823	0.194769	0.164805	0.231282	0.0693846	0.149823	142	5
4	5	0.0428525	0.17141	0.243927	0.0975708	0.142842	0.185694	0.157126	0.243927	0.0731781	0.142842	142	1
4	1	0.0300005	0.120002	0.145539	0.0582157	0.100002	0.130002	0.110002	0.145539	0.0436618	0.100002	143	2
4	2	0.0428525	0.17141	0.257464	0.102986	0.142842	0.185694	0.157126	0.257464	0.0772392	0.142842	143	2
4	3	0.0472872	0.189149	0.231282	0.0925128	0.157624	0.204911	0.173386	0.231282	0.0693846	0.157624	143	6
4	4	0.0527813	0.211125	0.208509	0.0834037	0.175938	0.228719	0.193531	0.208509	0.0625528	0.175938	143	5
4	5	0.0498923	0.199569	0.219489	0.0877957	0.166308	0.2162	0.182938	0.219489	0.0658467	0.166308	143	2
4	1	0.0428525	0.17141	0.257464	0.102986	0.142842	0.185694	0.157126	0.257464	0.0772392	0.142842	144	5
4	2	0.0449468	0.179787	0.243927	0.0975708	0.149823	0.194769	0.164805	0.243927	0.0731781	0.149823	144	6
4	3	0.0498923	0.199569	0.219489	0.0877957	0.166308	0.2162	0.182938	0.219489	0.0658467	0.166308	144	2
4	4	0.0449468	0.179787	0.243927	0.0975708	0.149823	0.194769	0.164805	0.243927	0.0731781	0.149823	144	4
4	5	0.0449468	0.179787	0.243927	0.0975708	0.149823	0.194769	0.164805	0.243927	0.0731781	0.149823	144	1
4	1	0.03	0.12	0.1	0.04	0.1	0.13	0.11	0.1	0.03	0.1	145	2
4	2	0.0300005	0.120002	0.151315	0.0605261	0.100002	0.130002	0.110002	0.151315	0.0453946	0.100002	145	5
4	3	0.0393312	0.157325	0.100796	0.0403185	0.131104	0.170435	0.144214	0.100796	0.0302389	0.131104	145	2
4	4	0.0300072	0.120029	0.140265	0.0561061	0.100024	0.130031	0.110026	0.140265	0.0420796	0.100024	145	6
4	5	0.0428525	0.17141	0.100384	0.0401536	0.142842	0.185694	0.157126	0.100384	0.0301152	0.142842	145	2
4	1	0.0300023	0.120009	0.145539	0.0582157	0.100008	0.13001	0.110008	0.145539	0.0436618	0.100008	146	5
4	2	0.0393312	0.157325	0.100796	0.0403185	0.131104	0.170435	0.144214	0.100796	0.0302389	0.131104	146	2
4	3	0.0300023	0.120009	0.145539	0.0582157	0.100008	0.13001	0.110008	0.145539	0.0436618	0.100008	146	3
4	4	0.0428525	0.17141	0.100384	0.0401536	0.142842	0.185694	0.157126	0.100384	0.0301152	0.142842	146	6
4	5	0.03	0.12	0.157624	0.0630496	0.1	0.13	0.11	0.157624	0.0472872	0.1	146	5
4	1	0.03	0.12	0.1	0.04	0.1	0.13	0.11	0.1	0.03	0.1	147	5
4	2	0.0300005	0.120002	0.157624	0.0630496	0.100002	0.130002	0.110002	0.157624	0.0472872	0.100002	147	1
4	3	0.0393312	0.157325	0.101097	0.0404387	0.131104	0.170435	0.144214	0.101097	0.030329	0.131104	147	2
4	4	0.0300072	0.120029	0.145539	0.0582157	0.100024	0.130031	0.110026	0.145539	0.0436618	0.100024	147	6
4	5	0.0428525	0.17141	0.100562	0.0402249	0.142842	0.185694	0.157126	0.100562	0.0301687	0.142842	147	2
4	1	0.0300023	0.120009	0.151315	0.0605261	0.100008	0.13001	0.110008	0.151315	0.0453946	0.100008	148	4
4	2	0.0393312	0.157325	0.101097	0.0404387	0.131104	0.170435	0.144214	0.101097	0.030329	0.131104	148	2
4	3	0.0300072	0.120029	0.145539	0.0582157	0.100024	0.130031	0.110026	0.145539	0.0436618	0.100024	148	6
4	4	0.0428525	0.17141	0.100562	0.0402249	0.142842	0.185694	0.157126	0.100562	0.0301687	0.142842	148	2
4	5	0.03	0.12	0.164497	0.0657989	0.1	0.13	0.11	0.164497	0.0493492	0.1	148	1
4	1	0.03	0.12	0.100001	0.0400002	0.1	0.13	0.11	0.100001	0.0300002	0.1	149	2
4	2	0.0300023	0.120009	0.157624	0.0630496	0.100008	0.13001	0.110008	0.157624	0.0472872	0.100008	149	5
4	3	0.0393312	0.157325	0.101475	0.0405901	0.131104	0.170435	0.144214	0.101475	0.0304426	0.131104	149	2
4	4	0.0300072	0.120029	0.151315	0.0605261	0.100024	0.130031	0.110026	0.151315	0.0453946	0.100024	149	3
4	5	0.0428525	0.17141	0.100796	0.0403185	0.142842	0.185694	0.157126	0.100796	0.0302389	0.142842	149	5
4	1	0.0300072	0.120029	0.151315	0.0605261	0.100024	0.130031	0.110026	0.151315	0.0453946	0.100024	150	4
4	2	0.0393312	0.157325	0.101475	0.0405901	0.131104	0.170435	0.144214	0.101475	0.0304426	0.131104	150	2
4	3	0.0300072	0.120029	0.151315	0.0605261	0.100024	0.130031	0.110026	0.151315	0.0453946	0.100024	150	6
4	4	0.0428525	0.17141	0.100796	0.0403185	0.142842	0.185694	0.157126	0.100796	0.0302389	0.142842	150	3
4	5	0.0300005	0.120002	0.164497	0.0657989	0.100002	0.130002	0.110002	0.164497	0.0493492	0.100002	150	4
4	1	0.03	0.12	0.100003	0.0400012	0.1	0.13	0.11	0.100003	0.0300009	0.1	151	3
4	2	0.0300023	0.120009	0.164497	0.0657989	0.100008	0.13001	0.110008	0.164497	0.0493492	0.100008	151	1
4	3	0.0393312	0.157325	0.101944	0.0407776	0.131104	0.170435	0.144214	0.101944	0.0305832	0.131104	151	5
4	4	0.0300072	0.120029	0.157624	0.0630496	0.100024	0.130031	0.110026	0.157624	0.0472872	0.100024	151	5
4	5	0.0428525	0.17141	0.101097	0.0404387	0.142842	0.185694	0.157126	0.101097	0.030329	0.142842	151	6
4	1	0.0300072	0.120029	0.157624	0.0630496	0.100024	0.130031	0.110026	0.157624	0.0472872	0.100024	152	1
4	2	0.0393312	0.157325	0.101944	0.0407776	0.131104	0.170435	0.144214	0.101944	0.0305832	0.131104	152	3
4	3	0.0300072	0.120029	0.157624	0.0630496	0.100024	0.130031	0.110026	0.157624	0.0472872	0.100024	152	3
4	4	0.0428525	0.17141	0.101097	0.0404387	0.142842	0.185694	0.157126	0.101097	0.030329	0.142842	152	6
4	5	0.0300005	0.120002	0.171968	0.0687871	0.100002	0.130002	0.110002	0.171968	0.0515903	0.100002	152	1
4	1	0.03	0.12	0.100003	0.0400012	0.1	0.13	0.11	0.100003	0.0300009	0.1	153	4
4	2	0.0300072	0.120029	0.164497	0.0657989	0.100024	0.130031	0.110026	0.164497	0.0493492	0.100024	153	6
4	3	0.0393312	0.157325	0.102517	0.0410066	0.131104	0.170435	0.144214	0.102517	0.030755	0.131104	153	5
4	4	0.0300176	0.12007	0.157624	0.0630496	0.100059	0.130076	0.110064	0.157624	0.0472872	0.100059	153	1
4	5	0.0428525	0.17141	0.101475	0.0405901	0.142842	0.185694	0.157126	0.101475	0.0304426	0.142842	153	2
4	1	0.0300176	0.12007	0.157624	0.0630496	0.100059	0.130076	0.110064	0.157624	0.0472872	0.100059	154	6
4	2	0.0393312	0.157325	0.102517	0.0410066	0.131104	0.170435	0.144214	0.102517	0.030755	0.131104	154	2
4	3	0.0300176	0.12007	0.157624	0.0630496	0.100059	0.130076	0.110064	0.157624	0.0472872	0.100059	154	3
4	4	0.0428525	0.17141	0.101475	0.0405901	0.142842	0.185694	0.157126	0.101475	0.0304426	0.142842	154	4
4	5	0.0300023	0.120009	0.171968	0.0687871	0.100008	0.13001	0.110008	0.171968	0.0515903	0.100008	154	1
4	1	0.03	0.12	0.10001	0.0400039	0.1	0.13	0.11	0.10001	0.0300029	0.1	155	5
4	2	0.0300176	0.12007	0.164497	0.0657989	0.100059	0.130076	0.110064	0.164497	0.0493492	0.100059	155	5
4	3	0.0393312	0.157325	0.103207	0.0412829	0.131104	0.170435	0.144214	0.103207	0.0309622	0.131104	155	2
4	4	0.0300365	0.120146	0.157624	0.0630496	0.100122	0.130158	0.110134	0.157624	0.0472872	0.100122	155	1
4	5	0.0428525	0.17141	0.101944	0.0407776	0.142842	0.185694	0.157126	0.101944	0.0305832	0.142842	155	2
4	1	0.0300176	0.12007	0.164497	0.0657989	0.100059	0.130076	0.110064	0.164497	0.0493492	0.100059	156	3
4	2	0.0393312	0.157325	0.103207	0.0412829	0.131104	0.170435	0.144214	0.103207	0.0309622	0.131104	156	6
4	3	0.0300365	0.120146	0.157624	0.0630496	0.100122	0.130158	0.110134	0.157624	0.0472872	0.100122	156	1
4	4	0.0428525	0.17141	0.101944	0.0407776	0.142842	0.185694	0.157126	0.101944	0.0305832	0.142842	156	5
4	5	0.0300072	0.120029	0.171968	0.0687871	0.100024	0.130031	0.110026	0.171968	0.0515903	0.100024	156	4
4	1	0.03	0.12	0.100024	0.0400096	0.1	0.13	0.11	0.100024	0.0300072	0.1	157	2
4	2	0.0300365	0.120146	0.164497	0.0657989	0.100122	0.130158	0.110134	0.164497	0.0493492	0.100122	157	1
4	3	0.0393312	0.157325	0.104031	0.0416124	0.131104	0.170435	0.144214	0.104031	0.0312093	0.131104	157	2
4	4	0.0300675	0.12027	0.157624	0.0630496	0.100225	0.130293	0.110248	0.157624	0.0472872	0.100225	157	6
4	5	0.0428525	0.17141	0.102517	0.0410066	0.142842	0.185694	0.157126	0.102517	0.030755	0.142842	157	2
4	1	0.0300365	0.120146	0.164497	0.0657989	0.100122	0.130158	0.110134	0.164497	0.0493492	0.100122	158	4
4	2	0.0393312	0.157325	0.104031	0.0416124	0.131104	0.170435	0.144214	0.104031	0.0312093	0.131104	158	2
4	3	0.0300675	0.12027	0.157624	0.0630496	0.100225	0.130293	0.110248	0.157624	0.0472872	0.100225	158	5
4	4	0.0428525	0.17141	0.102517	0.0410066	0.142842	0.185694	0.157126	0.102517	0.030755	0.142842	158	2
4	5	0.0300176	0.12007	0.171968	0.0687871	0.100059	0.130076	0.110064	0.171968	0.0515903	0.100059	158	1
4	1	0.03	0.12	0.10005	0.0400199	0.1	0.13	0.11	0.10005	0.0300149	0.1	159	6
4	2	0.0300675	0.12027	0.164497	0.0657989	0.100225	0.130293	0.110248	0.164497	0.0493492	0.100225	159	5
4	3	0.0393312	0.157325	0.105004	0.0420017	0.131104	0.170435	0.144214	0.105004	0.0315013	0.131104	159	2
4	4	0.0300675	0.12027	0.164497	0.0657989	0.100225	0.130293	0.110248	0.164497	0.0493492	0.100225	159	5
4	5	0.0428525	0.17141	0.103207	0.0412829	0.142842	0.185694	0.157126	0.103207	0.0309622	0.142842	159	2
4	1	0.0300365	0.120146	0.171968	0.0687871	0.100122	0.130158	0.110134	0.171968	0.0515903	0.100122	160	1
4	2	0.0393312	0.157325	0.105004	0.0420017	0.131104	0.170435	0.144214	0.105004	0.0315013	0.131104	160	5
4	3	0.0300675	0.12027	0.164497	0.0657989	0.100225	0.130293	0.110248	0.164497	0.0493492	0.100225	160	3
4	4	0.0428525	0.17141	0.103207	0.0412829	0.142842	0.185694	0.157126	0.103207	0.0309622	0.142842	160	2
4	5	0.0300365	0.120146	0.171968	0.0687871	0.100122	0.130158	0.110134	0.171968	0.0515903	0.100122	160	1
4	1	0.03	0.12	0.100092	0.0400369	0.1	0.13	0.11	0.100092	0.0300277	0.1	161	6
4	2	0.0301152	0.120461	0.164497	0.0657989	0.100384	0.130499	0.110422	0.164497	0.0493492	0.100384	161	5
4	3	0.0393312	0.157325	0.106144	0.0424576	0.131104	0.170435	0.144214	0.106144	0.0318432	0.131104	161	3
4	4	0.0300675	0.12027	0.171968	0.0687871	0.100225	0.130293	0.110248	0.171968	0.0515903	0.100225	161	1
4	5	0.0428525	0.17141	0.104031	0.0416124	0.142842	0.185694	0.157126	0.104031	0.0312093	0.142842	161	2
4	1	0.0300675	0.12027	0.171968	0.0687871	0.100225	0.130293	0.110248	0.171968	0.0515903	0.100225	162	4
4	2	0.0393312	0.157325	0.106144	0.0424576	0.131104	0.170435	0.144214	0.106144	0.0318432	0.131104	162	5
4	3	0.0301152	0.120461	0.164497	0.0657989	0.100384	0.130499	0.110422	0.164497	0.0493492	0.100384	162	3
4	4	0.0428525	0.17141	0.104031	0.0416124	0.142842	0.185694	0.157126	0.104031	0.0312093	0.142842	162	6
4	5	0.0300675	0.12027	0.171968	0.0687871	0.100225	0.130293	0.110248	0.171968	0.0515903	0.100225	162	1
4	1	0.03	0.12	0.100157	0.0400629	0.1	0.13	0.11	0.100157	0.0300472	0.1	163	3
4	2	0.0301845	0.120738	0.164497	0.0657989	0.100615	0.1308	0.110677	0.164497	0.0493492	0.100615	163	6
4	3	0.0393312	0.157325	0.107468	0.0429872	0.131104	0.170435	0.144214	0.107468	0.0322404	0.131104	163	5
4	4	0.0301152	0.120461	0.171968	0.0687871	0.100384	0.130499	0.110422	0.171968	0.0515903	0.100384	163	1
4	5	0.0428525	0.17141	0.105004	0.0420017	0.142842	0.185694	0.157126	0.105004	0.0315013	0.142842	163	2
4	1	0.0300675	0.12027	0.180069	0.0720277	0.100225	0.130293	0.110248	0.180069	0.0540208	0.100225	164	4
4	2	0.0393312	0.157325	0.107468	0.0429872	0.131104	0.170435	0.144214	0.107468	0.0322404	0.131104	164	2
4	3	0.0301845	0.120738	0.164497	0.0657989	0.100615	0.1308	0.110677	0.164497	0.0493492	0.100615	164	1
4	4	0.0428525	0.17141	0.105004	0.0420017	0.142842	0.185694	0.157126	0.105004	0.0315013	0.142842	164	5
4	5	0.0301152	0.120461	0.171968	0.0687871	0.100384	0.130499	0.110422	0.171968	0.0515903	0.100384	164	5
4	1	0.03	0.12	0.100252	0.0401008	0.1	0.13	0.11	0.100252	0.0300756	0.1	165	2
4	2	0.0302813	0.121125	0.164497	0.0657989	0.100938	0.131219	0.111031	0.164497	0.0493492	0.100938	165	1
4	3	0.0393312	0.157325	0.108995	0.0435982	0.131104	0.170435	0.144214	0.108995	0.0326986	0.131104	165	6
4	4	0.0301845	0.120738	0.171968	0.0687871	0.100615	0.1308	0.110677	0.171968	0.0515903	0.100615	165	3
4	5	0.0428525	0.17141	0.106144	0.0424576	0.142842	0.185694	0.157126	0.106144	0.0318432	0.142842	165	2
4	1	0.0301152	0.120461	0.180069	0.0720277	0.100384	0.130499	0.110422	0.180069	0.0540208	0.100384	166	1
4	2	0.0393312	0.157325	0.108995	0.0435982	0.131104	0.170435	0.144214	0.108995	0.0326986	0.131104	166	4
4	3	0.0302813	0.121125	0.164497	0.0657989	0.100938	0.131219	0.111031	0.164497	0.0493492	0.100938	166	6
4	4	0.0428525	0.17141	0.106144	0.0424576	0.142842	0.185694	0.157126	0.106144	0.0318432	0.142842	166	5
4	5	0.0301845	0.120738	0.171968	0.0687871	0.100615	0.1308	0.110677	0.171968	0.0515903	0.100615	166	1
4	1	0.03	0.12	0.100384	0.0401536	0.1	0.13	0.11	0.100384	0.0301152	0.1	167	6
4	2	0.0304118	0.121647	0.164497	0.0657989	0.101373	0.131784	0.11151	0.164497	0.0493492	0.101373	167	3
4	3	0.0393312	0.157325	0.110746	0.0442984	0.131104	0.170435	0.144214	0.110746	0.0332238	0.131104	167	3
4	4	0.0302813	0.121125	0.171968	0.0687871	0.100938	0.131219	0.111031	0.171968	0.0515903	0.100938	167	1
4	5	0.0428525	0.17141	0.107468	0.0429872	0.142842	0.185694	0.157126	0.107468	0.0322404	0.142842	167	5
4	1	0.0301845	0.120738	0.180069	0.0720277	0.100615	0.1308	0.110677	0.180069	0.0540208	0.100615	168	5
4	2	0.0393312	0.157325	0.110746	0.0442984	0.131104	0.170435	0.144214	0.110746	0.0332238	0.131104	168	6
4	3	0.0304118	0.121647	0.164497	0.0657989	0.101373	0.131784	0.11151	0.164497	0.0493492	0.101373	168	1
4	4	0.0428525	0.17141	0.107468	0.0429872	0.142842	0.185694	0.157126	0.107468	0.0322404	0.142842	168	3
4	5	0.0302813	0.121125	0.171968	0.0687871	0.100938	0.131219	0.111031	0.171968	0.0515903	0.100938	168	6
4	1	0.03	0.12	0.100562	0.0402249	0.1	0.13	0.11	0.100562	0.0301687	0.1	169	2
4	2	0.0305832	0.122333	0.164497	0.0657989	0.101944	0.132527	0.112138	0.164497	0.0493492	0.101944	169	1
4	3	0.0393312	0.157325	0.11274	0.0450961	0.131104	0.170435	0.144214	0.11274	0.0338221	0.131104	169	2
4	4	0.0304118	0.121647	0.171968	0.0687871	0.101373	0.131784	0.11151	0.171968	0.0515903	0.101373	169	4
4	5	0.0428525	0.17141	0.108995	0.0435982	0.142842	0.185694	0.157126	0.108995	0.0326986	0.142842	169	5
4	1	0.0302813	0.121125	0.180069	0.0720277	0.100938	0.131219	0.111031	0.180069	0.0540208	0.100938	170	1
4	2	0.0393312	0.157325	0.11274	0.0450961	0.131104	0.170435	0.144214	0.11274	0.0338221	0.131104	170	6
4	3	0.0305832	0.122333	0.164497	0.0657989	0.101944	0.132527	0.112138	0.164497	0.0493492	0.101944	170	3
4	4	0.0428525	0.17141	0.108995	0.0435982	0.142842	0.185694	0.157126	0.108995	0.0326986	0.142842	170	3
4	5	0.0304118	0.121647	0.171968	0.0687871	0.101373	0.131784	0.11151	0.171968	0.0515903	0.101373	170	1
4	1	0.03	0.12	0.100796	0.0403185	0.1	0.13	0.11	0.100796	0.0302389	0.1	171	2
4	2	0.0308033	0.123213	0.164497	0.0657989	0.102678	0.133481	0.112945	0.164497	0.0493492	0.102678	171	5
4	3	0.0393312	0.157325	0.115	0.046	0.131104	0.170435	0.144214	0.115	0.0345	0.131104	171	2
4	4	0.0305832	0.122333	0.171968	0.0687871	0.101944	0.132527	0.112138	0.171968	0.0515903	0.101944	171	1
4	5	0.0428525	0.17141	0.110746	0.0442984	0.142842	0.185694	0.157126	0.110746	0.0332238	0.142842	171	2
4	1	0.0304118	0.121647	0.180069	0.0720277	0.101373	0.131784	0.11151	0.180069	0.0540208	0.101373	172	6
4	2	0.0393312	0.157325	0.115	0.046	0.131104	0.170435	0.144214	0.115	0.0345	0.131104	172	2
4	3	0.0308033	0.123213	0.164497	0.0657989	0.102678	0.133481	0.112945	0.164497	0.0493492	0.102678	172	1
4	4	0.0428525	0.17141	0.110746	0.0442984	0.142842	0.185694	0.157126	0.110746	0.0332238	0.142842	172	2
4	5	0.0305832	0.122333	0.171968	0.0687871	0.101944	0.132527	0.112138	0.171968	0.0515903	0.101944	172	3
4	1	0.03	0.12	0.101097	0.0404387	0.1	0.13	0.11	0.101097	0.030329	0.1	173	2
4	2	0.0310805	0.124322	0.164497	0.0657989	0.103602	0.134682	0.113962	0.164497	0.0493492	0.103602	173	1
4	3	0.0393312	0.157325	0.117548	0.0470192	0.131104	0.170435	0.144214	0.117548	0.0352644	0.131104	173	2
4	4	0.0308033	0.123213	0.171968	0.0687871	0.102678	0.133481	0.112945	0.171968	0.0515903	0.102678	173	1
4	5	0.0428525	0.17141	0.11274	0.0450961	0.142842	0.185694	0.157126	0.11274	0.0338221	0.142842	173	2
4	1	0.0305832	0.122333	0.180069	0.0720277	0.101944	0.132527	0.112138	0.180069	0.0540208	0.101944	174	4
4	2	0.0393312	0.157325	0.117548	0.0470192	0.131104	0.170435	0.144214	0.117548	0.0352644	0.131104	174	2
4	3	0.0310805	0.124322	0.164497	0.0657989	0.103602	0.134682	0.113962	0.164497	0.0493492	0.103602	174	1
4	4	0.0428525	0.17141	0.11274	0.0450961	0.142842	0.185694	0.157126	0.11274	0.0338221	0.142842	174	2
4	5	0.0308033	0.123213	0.171968	0.0687871	0.102678	0.133481	0.112945	0.171968	0.0515903	0.102678	174	3
4	1	0.03	0.12	0.101475	0.0405901	0.1	0.13	0.11	0.101475	0.0304426	0.1	175	1
4	2	0.0314238	0.125695	0.164497	0.0657989	0.104746	0.13617	0.115221	0.164497	0.0493492	0.104746	175	4
4	3	0.0393312	0.157325	0.120407	0.0481629	0.131104	0.170435	0.144214	0.120407	0.0361222	0.131104	175	2
4	4	0.0310805	0.124322	0.171968	0.0687871	0.103602	0.134682	0.113962	0.171968	0.0515903	0.103602	175	1
4	5	0.0428525	0.17141	0.115	0.046	0.142842	0.185694	0.157126	0.115	0.0345	0.142842	175	5
4	1	0.0308033	0.123213	0.180069	0.0720277	0.102678	0.133481	0.112945	0.180069	0.0540208	0.102678	176	3
4	2	0.0393312	0.157325	0.120407	0.0481629	0.131104	0.170435	0.144214	0.120407	0.0361222	0.131104	176	1
4	3	0.0314238	0.125695	0.164497	0.0657989	0.104746	0.13617	0.115221	0.164497	0.0493492	0.104746	176	5
4	4	0.0428525	0.17141	0.115	0.046	0.142842	0.185694	0.157126	0.115	0.0345	0.142842	176	1
4	5	0.0310805	0.124322	0.171968	0.0687871	0.103602	0.134682	0.113962	0.171968	0.0515903	0.103602	176	4
4	1	0.0300005	0.120002	0.101475	0.0405901	0.100002	0.130002	0.110002	0.101475	0.0304426	0.100002	177	2
4	2	0.0318432	0.127373	0.164497	0.0657989	0.106144	0.137987	0.116758	0.164497	0.0493492	0.106144	177	1
4	3	0.0393312	0.157325	0.123603	0.0494411	0.131104	0.170435	0.144214	0.123603	0.0370808	0.131104	177	2
4	4	0.0314238	0.125695	0.171968	0.0687871	0.104746	0.13617	0.115221	0.171968	0.0515903	0.104746	177	3
4	5	0.0449468	0.179787	0.115	0.046	0.149823	0.194769	0.164805	0.115	0.0345	0.149823	177	2
4	1	0.0310805	0.124322	0.180069	0.0720277	0.103602	0.134682	0.113962	0.180069	0.0540208	0.103602	178	1
4	2	0.0409863	0.163945	0.120407	0.0481629	0.136621	0.177607	0.150283	0.120407	0.0361222	0.136621	178	2
4	3	0.0318432	0.127373	0.164497	0.0657989	0.106144	0.137987	0.116758	0.164497	0.0493492	0.106144	178	5
4	4	0.0449468	0.179787	0.115	0.046	0.149823	0.194769	0.164805	0.115	0.0345	0.149823	178	2
4	5	0.0314238	0.125695	0.171968	0.0687871	0.104746	0.13617	0.115221	0.171968	0.0515903	0.104746	178	2
4	1	0.0300005	0.120002	0.101944	0.0407776	0.100002	0.130002	0.110002	0.101944	0.0305832	0.100002	179	2
4	2	0.032349	0.129396	0.164497	0.0657989	0.10783	0.140179	0.118613	0.164497	0.0493492	0.10783	179	2
4	3	0.0393312	0.157325	0.12716	0.0508638	0.131104	0.170435	0.144214	0.12716	0.0381479	0.131104	179	2
4	4	0.0318432	0.127373	0.171968	0.0687871	0.106144	0.137987	0.116758	0.171968	0.0515903	0.106144	179	2
4	5	0.0449468	0.179787	0.117548	0.0470192	0.149823	0.194769	0.164805	0.117548	0.0352644	0.149823	179	2
4	1	0.0314238	0.125695	0.180069	0.0720277	0.104746	0.13617	0.115221	0.180069	0.0540208	0.104746	180	2
4	2	0.0409863	0.163945	0.123603	0.0494411	0.136621	0.177607	0.150283	0.123603	0.0370808	0.136621	180	2
4	3	0.032349	0.129396	0.164497	0.0657989	0.10783	0.140179	0.118613	0.164497	0.0493492	0.10783	180	2
4	4	0.0449468	0.179787	0.117548	0.0470192	0.149823	0.194769	0.164805	0.117548	0.0352644	0.149823	180	2
4	5	0.0314238	0.125695	0.180069	0.0720277	0.104746	0.13617	0.115221	0.180069	0.0540208	0.104746	180	2
4	1	0.0300005	0.120002	0.102517	0.0410066	0.100002	0.130002	0.110002	0.102517	0.030755	0.100002	181	2
4	2	0.032349	0.129396	0.171968	0.0687871	0.10783	0.140179	0.118613	0.171968	0.0515903	0.10783	181	2
4	3	0.0393312	0.157325	0.131104	0.0524416	0.131104	0.170435	0.144214	0.131104	0.0393312	0.131104	181	2
4	4	0.0318432	0.127373	0.180069	0.0720277	0.106144	0.137987	0.116758	0.180069	0.0540208	0.106144	181	2
4	5	0.0449468	0.179787	0.120407	0.0481629	0.149823	0.194769	0.164805	0.120407	0.0361222	0.149823	181	2
4	1	0.0314238	0.125695	0.188836	0.0755345	0.104746	0.13617	0.115221	0.188836	0.0566508	0.104746	182	1
4	2	0.0409863	0.163945	0.12716	0.0508638	0.136621	0.177607	0.150283	0.12716	0.0381479	0.136621	182	2
4	3	0.032349	0.129396	0.171968	0.0687871	0.10783	0.140179	0.118613	0.171968	0.0515903	0.10783	182	3
4	4	0.0449468	0.179787	0.120407	0.0481629	0.149823	0.194769	0.164805	0.120407	0.0361222	0.149823	182	2
4	5	0.0314238	0.125695	0.188836	0.0755345	0.104746	0.13617	0.115221	0.188836	0.0566508	0.104746	182	2
4	1	0.0300005	0.120002	0.103207	0.0412829	0.100002	0.130002	0.110002	0.103207	0.0309622	0.100002	183	2
4	2	0.032349	0.129396	0.180069	0.0720277	0.10783	0.140179	0.118613	0.180069	0.0540208	0.10783	183	1
4	3	0.0393312	0.157325	0.135463	0.0541853	0.131104	0.170435	0.144214	0.135463	0.040639	0.131104	183	2
4	4	0.0318432	0.127373	0.188836	0.0755345	0.106144	0.137987	0.116758	0.188836	0.0566508	0.106144	183	6
4	5	0.0449468	0.179787	0.123603	0.0494411	0.149823	0.194769	0.164805	0.123603	0.0370808	0.149823	183	2
4	1	0.0318432	0.127373	0.188836	0.0755345	0.106144	0.137987	0.116758	0.188836	0.0566508	0.106144	184	1
4	2	0.0409863	0.163945	0.131104	0.0524416	0.136621	0.177607	0.150283	0.131104	0.0393312	0.136621	184	2
4	3	0.0329525	0.13181	0.171968	0.0687871	0.109842	0.142794	0.120826	0.171968	0.0515903	0.109842	184	3
4	4	0.0449468	0.179787	0.123603	0.0494411	0.149823	0.194769	0.164805	0.123603	0.0370808	0.149823	184	2
4	5	0.0314238	0.125695	0.198304	0.0793216	0.104746	0.13617	0.115221	0.198304	0.0594912	0.104746	184	1
4	1	0.0300005	0.120002	0.104031	0.0416124	0.100002	0.130002	0.110002	0.104031	0.0312093	0.100002	185	2
4	2	0.0329525	0.13181	0.180069	0.0720277	0.109842	0.142794	0.120826	0.180069	0.0540208	0.109842	185	4
4	3	0.0393312	0.157325	0.140265	0.0561061	0.131104	0.170435	0.144214	0.140265	0.0420796	0.131104	185	2
4	4	0.032349	0.129396	0.188836	0.0755345	0.10783	0.140179	0.118613	0.188836	0.0566508	0.10783	185	1
4	5	0.0449468	0.179787	0.12716	0.0508638	0.149823	0.194769	0.164805	0.12716	0.0381479	0.149823	185	2
4	1	0.032349	0.129396	0.188836	0.0755345	0.10783	0.140179	0.118613	0.188836	0.0566508	0.10783	186	1
4	2	0.0409863	0.163945	0.135463	0.0541853	0.136621	0.177607	0.150283	0.135463	0.040639	0.136621	186	2
4	3	0.0336653	0.134661	0.171968	0.0687871	0.112218	0.145883	0.123439	0.171968	0.0515903	0.112218	186	5
4	4	0.0449468	0.179787	0.12716	0.0508638	0.149823	0.194769	0.164805	0.12716	0.0381479	0.149823	186	2
4	5	0.0318432	0.127373	0.198304	0.0793216	0.106144	0.137987	0.116758	0.198304	0.0594912	0.106144	186	1
4	1	0.0300005	0.120002	0.105004	0.0420017	0.100002	0.130002	0.110002	0.105004	0.0315013	0.100002	187	2
4	2	0.0336653	0.134661	0.180069	0.0720277	0.112218	0.145883	0.123439	0.180069	0.0540208	0.112218	187	3
4	3	0.0393312	0.157325	0.145539	0.0582157	0.131104	0.170435	0.144214	0.145539	0.0436618	0.131104	187	2
4	4	0.0329525	0.13181	0.188836	0.0755345	0.109842	0.142794	0.120826	0.188836	0.0566508	0.109842	187	1
4	5	0.0449468	0.179787	0.131104	0.0524416	0.149823	0.194769	0.164805	0.131104	0.0393312	0.149823	187	6
4	1	0.0329525	0.13181	0.188836	0.0755345	0.109842	0.142794	0.120826	0.188836	0.0566508	0.109842	188	1
4	2	0.0409863	0.163945	0.140265	0.0561061	0.136621	0.177607	0.150283	0.140265	0.0420796	0.136621	188	2
4	3	0.0345	0.138	0.171968	0.0687871	0.115	0.1495	0.1265	0.171968	0.0515903	0.115	188	4
4	4	0.0449468	0.179787	0.131104	0.0524416	0.149823	0.194769	0.164805	0.131104	0.0393312	0.149823	188	2
4	5	0.032349	0.129396	0.198304	0.0793216	0.10783	0.140179	0.118613	0.198304	0.0594912	0.10783	188	1
4	1	0.0300005	0.120002	0.106144	0.0424576	0.100002	0.130002	0.110002	0.106144	0.0318432	0.100002	189	2
4	2	0.0345	0.138	0.180069	0.0720277	0.115	0.1495	0.1265	0.180069	0.0540208	0.115	189	3
4	3	0.0393312	0.157325	0.151315	0.0605261	0.131104	0.170435	0.144214	0.151315	0.0453946	0.131104	189	1
4	4	0.0336653	0.134661	0.188836	0.0755345	0.112218	0.145883	0.123439	0.188836	0.0566508	0.112218	189	5
4	5	0.0472872	0.189149	0.131104	0.0524416	0.157624	0.204911	0.173386	0.131104	0.0393312	0.157624	189	1
4	1	0.0336653	0.134661	0.188836	0.0755345	0.112218	0.145883	0.123439	0.188836	0.0566508	0.112218	190	6
4	2	0.0409863	0.163945	0.145539	0.0582157	0.136621	0.177607	0.150283	0.145539	0.0436618	0.136621	190	2
4	3	0.0354698	0.141879	0.171968	0.0687871	0.118233	0.153702	0.130056	0.171968	0.0515903	0.118233	190	1
4	4	0.0449468	0.179787	0.135463	0.0541853	0.149823	0.194769	0.164805	0.135463	0.040639	0.149823	190	2
4	5	0.0329525	0.13181	0.198304	0.0793216	0.109842	0.142794	0.120826	0.198304	0.0594912	0.109842	190	3
4	1	0.0300005	0.120002	0.107468	0.0429872	0.100002	0.130002	0.110002	0.107468	0.0322404	0.100002	191	2
4	2	0.0354698	0.141879	0.180069	0.0720277	0.118233	0.153702	0.130056	0.180069	0.0540208	0.118233	191	1
4	3	0.0409863	0.163945	0.151315	0.0605261	0.136621	0.177607	0.150283	0.151315	0.0453946	0.136621	191	2
4	4	0.0345	0.138	0.188836	0.0755345	0.115	0.1495	0.1265	0.188836	0.0566508	0.115	191	4
4	5	0.0498923	0.199569	0.131104	0.0524416	0.166308	0.2162	0.182938	0.131104	0.0393312	0.166308	191	2
4	1	0.0345	0.138	0.188836	0.0755345	0.115	0.1495	0.1265	0.188836	0.0566508	0.115	192	1
4	2	0.0409863	0.163945	0.151315	0.0605261	0.136621	0.177607	0.150283	0.151315	0.0453946	0.136621	192	2
4	3	0.0365885	0.146354	0.171968	0.0687871	0.121962	0.15855	0.134158	0.171968	0.0515903	0.121962	192	2
4	4	0.0449468	0.179787	0.140265	0.0561061	0.149823	0.194769	0.164805	0.140265	0.0420796	0.149823	192	2
4	5	0.0336653	0.134661	0.198304	0.0793216	0.112218	0.145883	0.123439	0.198304	0.0594912	0.112218	192	5
4	1	0.0300005	0.120002	0.108995	0.0435982	0.100002	0.130002	0.110002	0.108995	0.0326986	0.100002	193	2
4	2	0.0365885	0.146354	0.180069	0.0720277	0.121962	0.15855	0.134158	0.180069	0.0540208	0.121962	193	2
4	3	0.0409863	0.163945	0.157624	0.0630496	0.136621	0.177607	0.150283	0.157624	0.0472872	0.136621	193	2
4	4	0.0354698	0.141879	0.188836	0.0755345	0.118233	0.153702	0.130056	0.188836	0.0566508	0.118233	193	1
4	5	0.0498923	0.199569	0.135463	0.0541853	0.166308	0.2162	0.182938	0.135463	0.040639	0.166308	193	2
4	1	0.0354698	0.141879	0.188836	0.0755345	0.118233	0.153702	0.130056	0.188836	0.0566508	0.118233	194	6
4	2	0.0409863	0.163945	0.157624	0.0630496	0.136621	0.177607	0.150283	0.157624	0.0472872	0.136621	194	2
4	3	0.0365885	0.146354	0.180069	0.0720277	0.121962	0.15855	0.134158	0.180069	0.0540208	0.121962	194	2
4	4	0.0449468	0.179787	0.145539	0.0582157	0.149823	0.194769	0.164805	0.145539	0.0436618	0.149823	194	2
4	5	0.0345	0.138	0.198304	0.0793216	0.115	0.1495	0.1265	0.198304	0.0594912	0.115	194	1
4	1	0.0300005	0.120002	0.110746	0.0442984	0.100002	0.130002	0.110002	0.110746	0.0332238	0.100002	195	2
4	2	0.0365885	0.146354	0.188836	0.0755345	0.121962	0.15855	0.134158	0.188836	0.0566508	0.121962	195	3
4	3	0.0409863	0.163945	0.164497	0.0657989	0.136621	0.177607	0.150283	0.164497	0.0493492	0.136621	195	2
4	4	0.0365885	0.146354	0.188836	0.0755345	0.121962	0.15855	0.134158	0.188836	0.0566508	0.121962	195	1
4	5	0.0498923	0.199569	0.140265	0.0561061	0.166308	0.2162	0.182938	0.140265	0.0420796	0.166308	195	2
4	1	0.0365885	0.146354	0.188836	0.0755345	0.121962	0.15855	0.134158	0.188836	0.0566508	0.121962	196	5
4	2	0.0409863	0.163945	0.164497	0.0657989	0.136621	0.177607	0.150283	0.164497	0.0493492	0.136621	196	2
4	3	0.0365885	0.146354	0.188836	0.0755345	0.121962	0.15855	0.134158	0.188836	0.0566508	0.121962	196	1
4	4	0.0449468	0.179787	0.151315	0.0605261	0.149823	0.194769	0.164805	0.151315	0.0453946	0.149823	196	2
4	5	0.0354698	0.141879	0.198304	0.0793216	0.118233	0.153702	0.130056	0.198304	0.0594912	0.118233	196	6
4	1	0.0300005	0.120002	0.11274	0.0450961	0.100002	0.130002	0.110002	0.11274	0.0338221	0.100002	197	2
4	2	0.0378705	0.151482	0.188836	0.0755345	0.126235	0.164106	0.138859	0.188836	0.0566508	0.126235	197	2
4	3	0.0409863	0.163945	0.171968	0.0687871	0.136621	0.177607	0.150283	0.171968	0.0515903	0.136621	197	2
4	4	0.0378705	0.151482	0.188836	0.0755345	0.126235	0.164106	0.138859	0.188836	0.0566508	0.126235	197	1
4	5	0.0498923	0.199569	0.145539	0.0582157	0.166308	0.2162	0.182938	0.145539	0.0436618	0.166308	197	2
4	1	0.0378705	0.151482	0.188836	0.0755345	0.126235	0.164106	0.138859	0.188836	0.0566508	0.126235	198	3
4	2	0.0409863	0.163945	0.171968	0.0687871	0.136621	0.177607	0.150283	0.171968	0.0515903	0.136621	198	2
4	3	0.0378705	0.151482	0.188836	0.0755345	0.126235	0.164106	0.138859	0.188836	0.0566508	0.126235	198	2
4	4	0.0449468	0.179787	0.157624	0.0630496	0.149823	0.194769	0.164805	0.157624	0.0472872	0.149823	198	2
4	5	0.0365885	0.146354	0.198304	0.0793216	0.121962	0.15855	0.134158	0.198304	0.0594912	0.121962	198	1
4	1	0.0300005	0.120002	0.115	0.046	0.100002	0.130002	0.110002	0.115	0.0345	0.100002	199	2
4	2	0.0378705	0.151482	0.198304	0.0793216	0.126235	0.164106	0.138859	0.198304	0.0594912	0.126235	199	2
4	3	0.0409863	0.163945	0.180069	0.0720277	0.136621	0.177607	0.150283	0.180069	0.0540208	0.136621	199	4
4	4	0.0393312	0.157325	0.188836	0.0755345	0.131104	0.170435	0.144214	0.188836	0.0566508	0.131104	199	2
4	5	0.0498923	0.199569	0.151315	0.0605261	0.166308	0.2162	0.182938	0.151315	0.0453946	0.166308	199	2
4	1	0.0393312	0.157325	0.188836	0.0755345	0.131104	0.170435	0.144214	0.188836	0.0566508	0.131104	200	2
4	2	0.0409863	0.163945	0.180069	0.0720277	0.136621	0.177607	0.150283	0.180069	0.0540208	0.136621	200	2
4	3	0.0378705	0.151482	0.198304	0.0793216	0.126235	0.164106	0.138859	0.198304	0.0594912	0.126235	200	5
4	4	0.0449468	0.179787	0.164497	0.0657989	0.149823	0.194769	0.164805	0.164497	0.0493492	0.149823	200	2
4	5	0.0378705	0.151482	0.198304	0.0793216	0.126235	0.164106	0.138859	0.198304	0.0594912	0.126235	200	1
4	1	0.0300005	0.120002	0.117548	0.0470192	0.100002	0.130002	0.110002	0.117548	0.0352644	0.100002	201	2
4	2	0.0378705	0.151482	0.208509	0.0834037	0.126235	0.164106	0.138859	0.208509	0.0625528	0.126235	201	2
4	3	0.0428525	0.17141	0.180069	0.0720277	0.142842	0.185694	0.157126	0.180069	0.0540208	0.142842	201	5
4	4	0.0393312	0.157325	0.198304	0.0793216	0.131104	0.170435	0.144214	0.198304	0.0594912	0.131104	201	2
4	5	0.0498923	0.199569	0.157624	0.0630496	0.166308	0.2162	0.182938	0.157624	0.0472872	0.166308	201	2
4	1	0.0393312	0.157325	0.198304	0.0793216	0.131104	0.170435	0.144214	0.198304	0.0594912	0.131104	202	1
4	2	0.0409863	0.163945	0.188836	0.0755345	0.136621	0.177607	0.150283	0.188836	0.0566508	0.136621	202	3
4	3	0.0393312	0.157325	0.198304	0.0793216	0.131104	0.170435	0.144214	0.198304	0.0594912	0.131104	202	1
4	4	0.0449468	0.179787	0.171968	0.0687871	0.149823	0.194769	0.164805	0.171968	0.0515903	0.149823	202	2
4	5	0.0393312	0.157325	0.198304	0.0793216	0.131104	0.170435	0.144214	0.198304	0.0594912	0.131104	202	5
4	1	0.0300005	0.120002	0.120407	0.0481629	0.100002	0.130002	0.110002	0.120407	0.0361222	0.100002	203	2
4	2	0.0378705	0.151482	0.219489	0.0877957	0.126235	0.164106	0.138859	0.219489	0.0658467	0.126235	203	1
4	3	0.0449468	0.179787	0.180069	0.0720277	0.149823	0.194769	0.164805	0.180069	0.0540208	0.149823	203	2
4	4	0.0393312	0.157325	0.208509	0.0834037	0.131104	0.170435	0.144214	0.208509	0.0625528	0.131104	203	3
4	5	0.0498923	0.199569	0.164497	0.0657989	0.166308	0.2162	0.182938	0.164497	0.0493492	0.166308	203	2
4	1	0.0409863	0.163945	0.198304	0.0793216	0.136621	0.177607	0.150283	0.198304	0.0594912	0.136621	204	2
4	2	0.0428525	0.17141	0.188836	0.0755345	0.142842	0.185694	0.157126	0.188836	0.0566508	0.142842	204	2
4	3	0.0409863	0.163945	0.198304	0.0793216	0.136621	0.177607	0.150283	0.198304	0.0594912	0.136621	204	2
4	4	0.0449468	0.179787	0.180069	0.0720277	0.149823	0.194769	0.164805	0.180069	0.0540208	0.149823	204	2
4	5	0.0409863	0.163945	0.198304	0.0793216	0.136621	0.177607	0.150283	0.198304	0.0594912	0.136621	204	2
4	1	0.0300005	0.120002	0.123603	0.0494411	0.100002	0.130002	0.110002	0.123603	0.0370808	0.100002	205	2
4	2	0.0393312	0.157325	0.219489	0.0877957	0.131104	0.170435	0.144214	0.219489	0.0658467	0.131104	205	1
4	3	0.0449468	0.179787	0.188836	0.0755345	0.149823	0.194769	0.164805	0.188836	0.0566508	0.149823	205	2
4	4	0.0409863	0.163945	0.208509	0.0834037	0.136621	0.177607	0.150283	0.208509	0.0625528	0.136621	205	5
4	5	0.0498923	0.199569	0.171968	0.0687871	0.166308	0.2162	0.182938	0.171968	0.0515903	0.166308	205	2
4	1	0.0409863	0.163945	0.208509	0.0834037	0.136621	0.177607	0.150283	0.208509	0.0625528	0.136621	206	2
4	2	0.0428525	0.17141	0.198304	0.0793216	0.142842	0.185694	0.157126	0.198304	0.0594912	0.142842	206	2
4	3	0.0409863	0.163945	0.208509	0.0834037	0.136621	0.177607	0.150283	0.208509	0.0625528	0.136621	206	1
4	4	0.0449468	0.179787	0.188836	0.0755345	0.149823	0.194769	0.164805	0.188836	0.0566508	0.149823	206	2
4	5	0.0409863	0.163945	0.208509	0.0834037	0.136621	0.177607	0.150283	0.208509	0.0625528	0.136621	206	6
4	1	0.0300005	0.120002	0.12716	0.0508638	0.100002	0.130002	0.110002	0.12716	0.0381479	0.100002	207	2
4	2	0.0409863	0.163945	0.219489	0.0877957	0.136621	0.177607	0.150283	0.219489	0.0658467	0.136621	207	1
4	3	0.0449468	0.179787	0.198304	0.0793216	0.149823	0.194769	0.164805	0.198304	0.0594912	0.149823	207	2
4	4	0.0428525	0.17141	0.208509	0.0834037	0.142842	0.185694	0.157126	0.208509	0.0625528	0.142842	207	4
4	5	0.0498923	0.199569	0.180069	0.0720277	0.166308	0.2162	0.182938	0.180069	0.0540208	0.166308	207	2
4	1	0.0409863	0.163945	0.219489	0.0877957	0.136621	0.177607	0.150283	0.219489	0.0658467	0.136621	208	2
4	2	0.0428525	0.17141	0.208509	0.0834037	0.142842	0.185694	0.157126	0.208509	0.0625528	0.142842	208	2
4	3	0.0428525	0.17141	0.208509	0.0834037	0.142842	0.185694	0.157126	0.208509	0.0625528	0.142842	208	1
4	4	0.0449468	0.179787	0.198304	0.0793216	0.149823	0.194769	0.164805	0.198304	0.0594912	0.149823	208	2
4	5	0.0428525	0.17141	0.208509	0.0834037	0.142842	0.185694	0.157126	0.208509	0.0625528	0.142842	208	2
4	1	0.0300005	0.120002	0.131104	0.0524416	0.100002	0.130002	0.110002	0.131104	0.0393312	0.100002	209	2
4	2	0.0428525	0.17141	0.219489	0.0877957	0.142842	0.185694	0.157126	0.219489	0.0658467	0.142842	209	2
4	3	0.0449468	0.179787	0.208509	0.0834037	0.149823	0.194769	0.164805	0.208509	0.0625528	0.149823	209	2
4	4	0.0449468	0.179787	0.208509	0.0834037	0.149823	0.194769	0.164805	0.208509	0.0625528	0.149823	209	1
4	5	0.0498923	0.199569	0.188836	0.0755345	0.166308	0.2162	0.182938	0.188836	0.0566508	0.166308	209	2
4	1	0.0409863	0.163945	0.231282	0.0925128	0.136621	0.177607	0.150283	0.231282	0.0693846	0.136621	210	6
4	2	0.0428525	0.17141	0.219489	0.0877957	0.142842	0.185694	0.157126	0.219489	0.0658467	0.142842	210	1
4	3	0.0449468	0.179787	0.208509	0.0834037	0.149823	0.194769	0.164805	0.208509	0.0625528	0.149823	210	6
4	4	0.0449468	0.179787	0.208509	0.0834037	0.149823	0.194769	0.164805	0.208509	0.0625528	0.149823	210	2
4	5	0.0428525	0.17141	0.219489	0.0877957	0.142842	0.185694	0.157126	0.219489	0.0658467	0.142842	210	2
4	1	0.0300005	0.120002	0.135463	0.0541853	0.100002	0.130002	0.110002	0.135463	0.040639	0.100002	211	2
4	2	0.0428525	0.17141	0.231282	0.0925128	0.142842	0.185694	0.157126	0.231282	0.0693846	0.142842	211	2
4	3	0.0449468	0.179787	0.219489	0.0877957	0.149823	0.194769	0.164805	0.219489	0.0658467	0.149823	211	1
4	4	0.0472872	0.189149	0.208509	0.0834037	0.157624	0.204911	0.173386	0.208509	0.0625528	0.157624	211	1
4	5	0.0498923	0.199569	0.198304	0.0793216	0.166308	0.2162	0.182938	0.198304	0.0594912	0.166308	211	2
4	1	0.0428525	0.17141	0.231282	0.0925128	0.142842	0.185694	0.157126	0.231282	0.0693846	0.142842	212	2
4	2	0.0449468	0.179787	0.219489	0.0877957	0.149823	0.194769	0.164805	0.219489	0.0658467	0.149823	212	2
4	3	0.0472872	0.189149	0.208509	0.0834037	0.157624	0.204911	0.173386	0.208509	0.0625528	0.157624	212	2
4	4	0.0449468	0.179787	0.219489	0.0877957	0.149823	0.194769	0.164805	0.219489	0.0658467	0.149823	212	2
4	5	0.0428525	0.17141	0.231282	0.0925128	0.142842	0.185694	0.157126	0.231282	0.0693846	0.142842	212	2
4	1	0.0300005	0.120002	0.140265	0.0561061	0.100002	0.130002	0.110002	0.140265	0.0420796	0.100002	213	2
4	2	0.0428525	0.17141	0.243927	0.0975708	0.142842	0.185694	0.157126	0.243927	0.0731781	0.142842	213	2
4	3	0.0472872	0.189149	0.219489	0.0877957	0.157624	0.204911	0.173386	0.219489	0.0658467	0.157624	213	2
4	4	0.0498923	0.199569	0.208509	0.0834037	0.166308	0.2162	0.182938	0.208509	0.0625528	0.166308	213	6
4	5	0.0498923	0.199569	0.208509	0.0834037	0.166308	0.2162	0.182938	0.208509	0.0625528	0.166308	213	2
4	1	0.0428525	0.17141	0.243927	0.0975708	0.142842	0.185694	0.157126	0.243927	0.0731781	0.142842	214	2
4	2	0.0449468	0.179787	0.231282	0.0925128	0.149823	0.194769	0.164805	0.231282	0.0693846	0.149823	214	2
4	3	0.0472872	0.189149	0.219489	0.0877957	0.157624	0.204911	0.173386	0.219489	0.0658467	0.157624	214	1
4	4	0.0449468	0.179787	0.231282	0.0925128	0.149823	0.194769	0.164805	0.231282	0.0693846	0.149823	214	2
4	5	0.0428525	0.17141	0.243927	0.0975708	0.142842	0.185694	0.157126	0.243927	0.0731781	0.142842	214	1
4	1	0.0300005	0.120002	0.145539	0.0582157	0.100002	0.130002	0.110002	0.145539	0.0436618	0.100002	215	2
4	2	0.0428525	0.17141	0.257464	0.102986	0.142842	0.185694	0.157126	0.257464	0.0772392	0.142842	215	2
4	3	0.0472872	0.189149	0.231282	0.0925128	0.157624	0.204911	0.173386	0.231282	0.0693846	0.157624	215	2
4	4	0.0527813	0.211125	0.208509	0.0834037	0.175938	0.228719	0.193531	0.208509	0.0625528	0.175938	215	2
4	5	0.0498923	0.199569	0.219489	0.0877957	0.166308	0.2162	0.182938	0.219489	0.0658467	0.166308	215	2
4	1	0.0428525	0.17141	0.257464	0.102986	0.142842	0.185694	0.157126	0.257464	0.0772392	0.142842	216	1
4	2	0.0449468	0.179787	0.243927	0.0975708	0.149823	0.194769	0.164805	0.243927	0.0731781	0.149823	216	2
4	3	0.0498923	0.199569	0.219489	0.0877957	0.166308	0.2162	0.182938	0.219489	0.0658467	0.166308	216	2
4	4	0.0449468	0.179787	0.243927	0.0975708	0.149823	0.194769	0.164805	0.243927	0.0731781	0.149823	216	2
4	5	0.0449468	0.179787	0.243927	0.0975708	0.149823	0.194769	0.164805	0.243927	0.0731781	0.149823	216	6
